# Supplementary material for: A DFT examination of the role of proximal boron functionalities in the S-alkylation of sulfenic acid anions
Source: Royal Society of Chemistry journal article supplement (doi:10.1039/d1ob02083h), 2021-12-24
Supplement: d1ob02083h1.pdf [file d1ob02083h1.pdf]

## ELECTRONIC SUPPORTING INFORMATION

### **A DFT Examination of the Role of Proximal Boron Functionalities on the S-Alkylation of Sulfenic Acid Anions**

Andrew G. Durant, Eric A. Nicol, Brandon M. McInnes and Adrian L. Schwan\*

*Department of Chemistry, University of Guelph, Guelph, Ontario, Canada N1G 2W1*

#### Table of Contents

|                                                                                    |    |
|------------------------------------------------------------------------------------|----|
| Images of optimized alkylation transition states                                   | S2 |
| Optimized geometric parameters for selected complexes and transition states        | S4 |
| Natural bond orbital representations of selected transition states                 | S5 |
| Cartesian coordinates and thermochemistry data of structures and transition states | S8 |

**Table S1. Optimized alkylation transition states.**

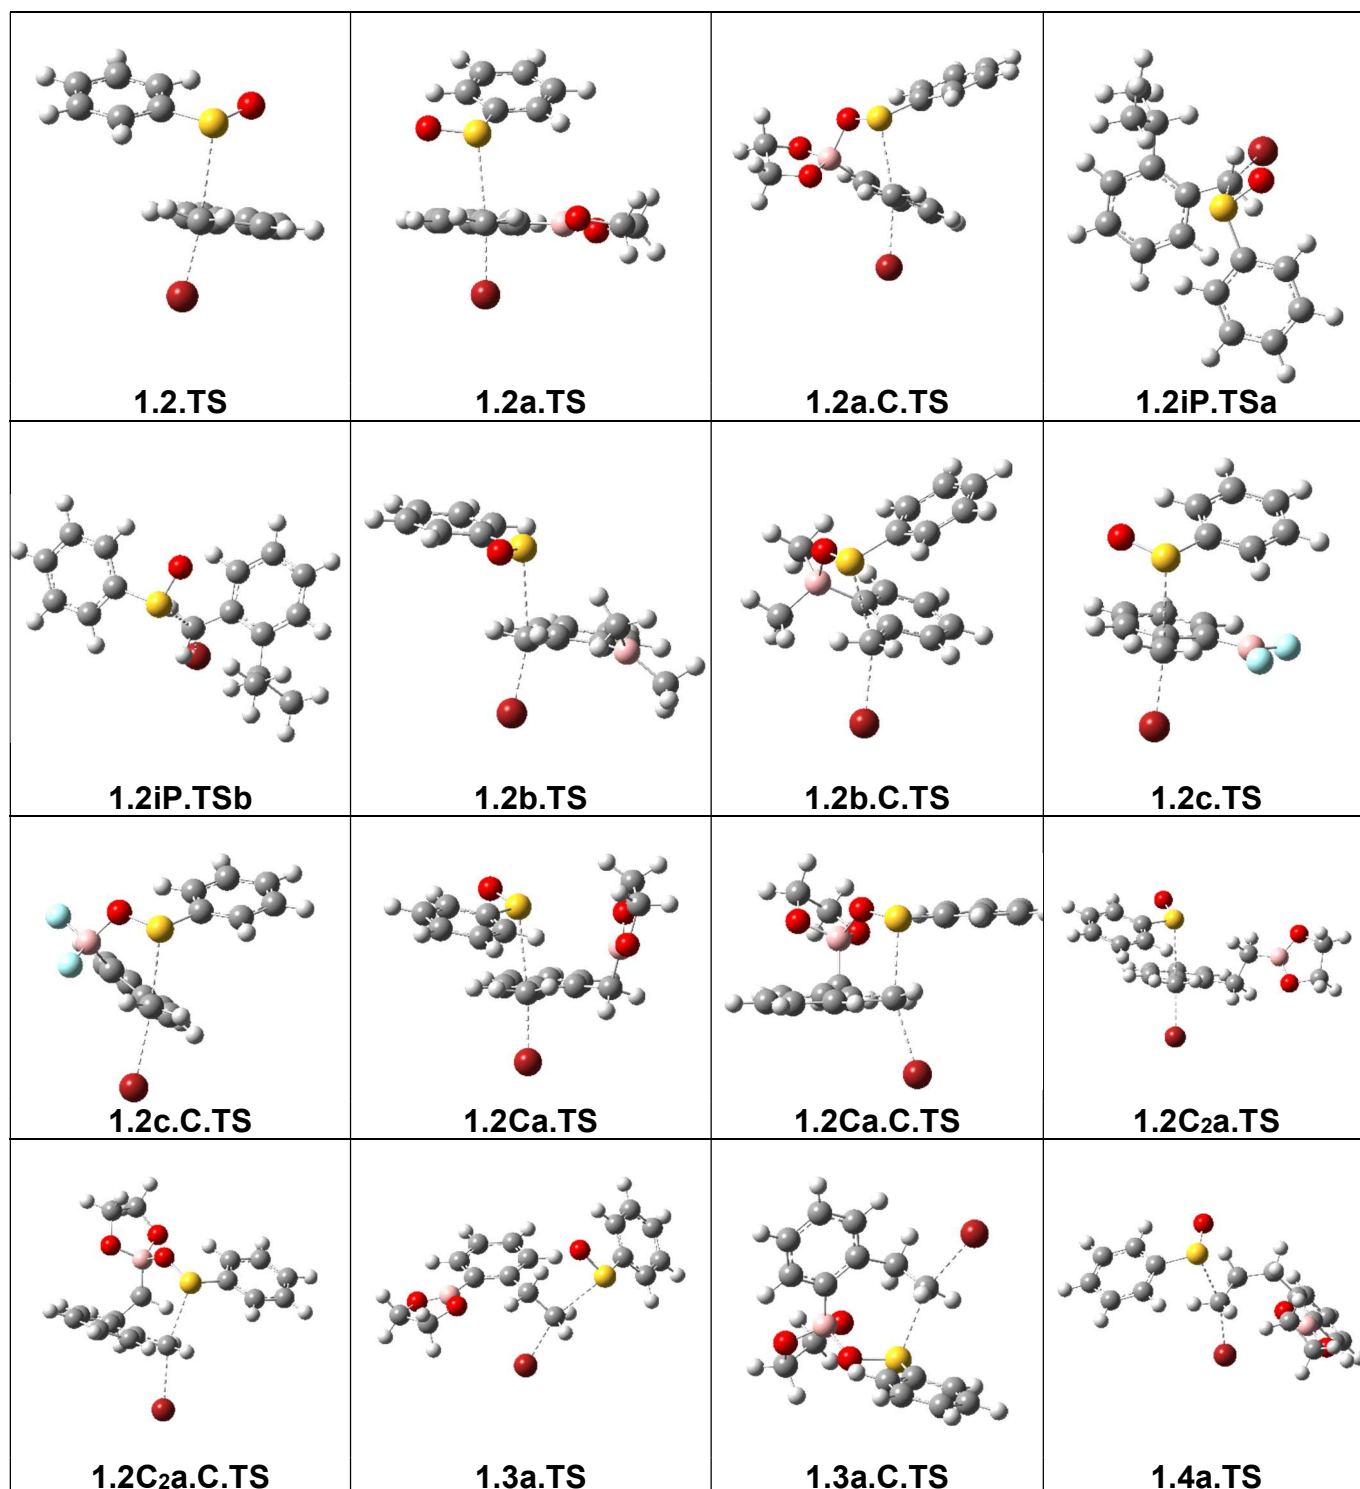

Table S1. Alkylation transitions states, continued

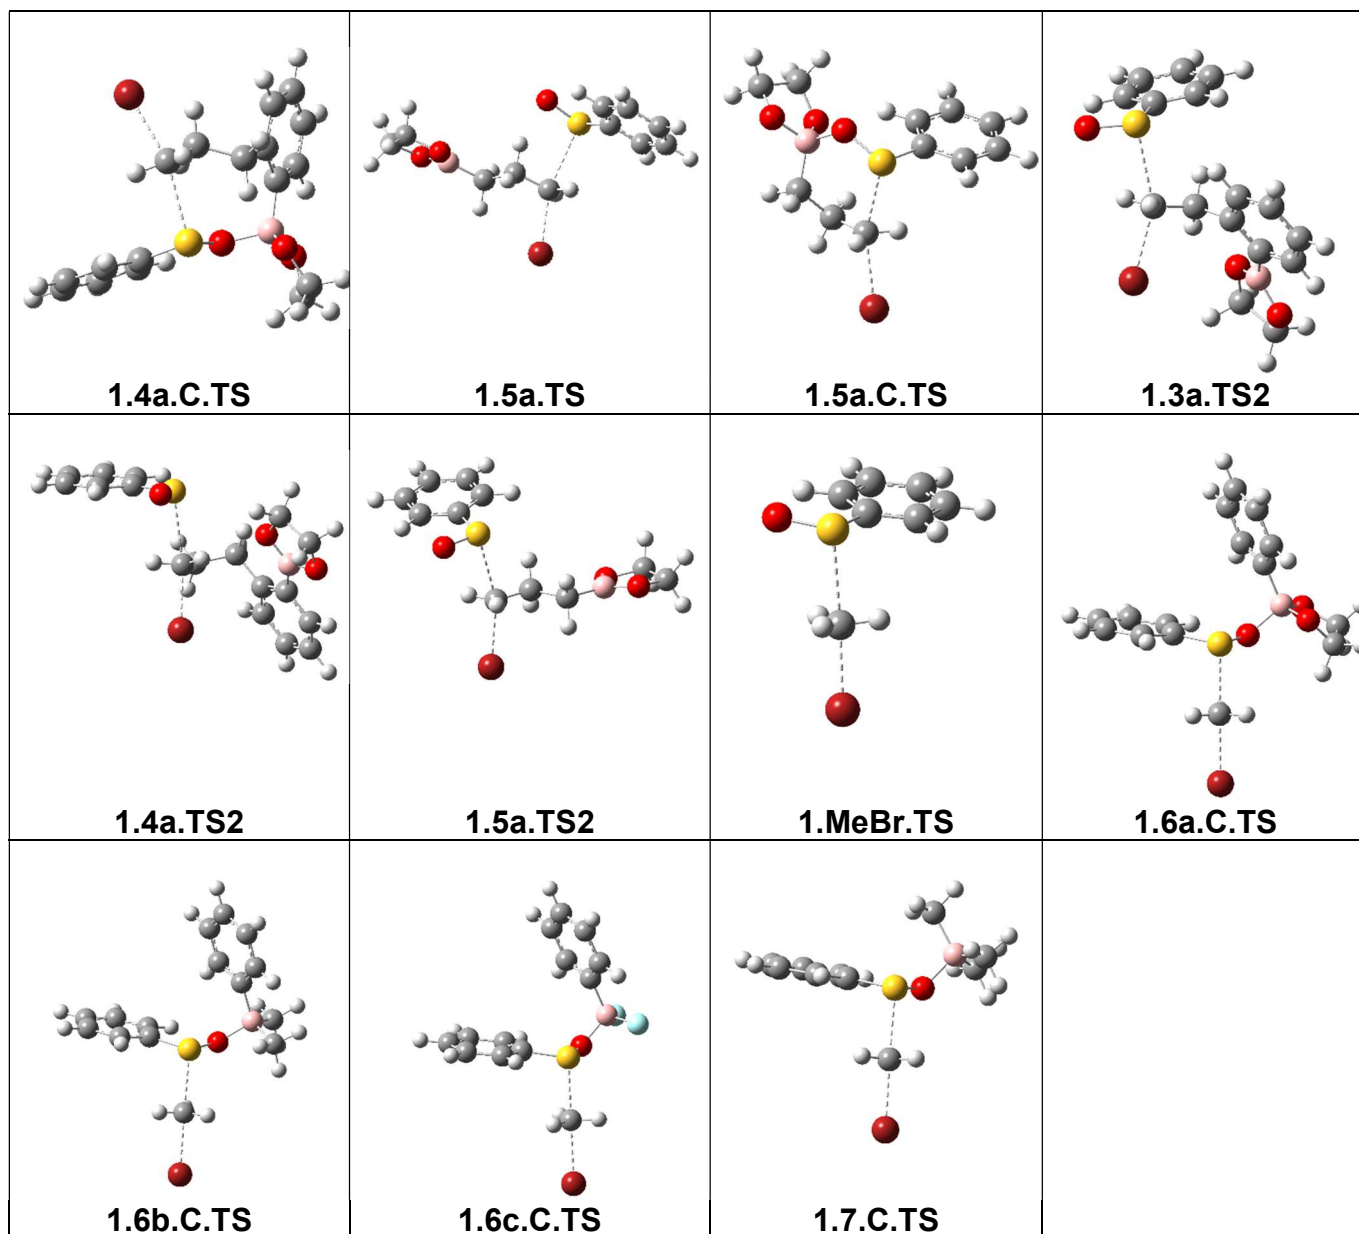

**Table S2. Optimized geometric parameters for selected complexes and transition states.**

| Structure                     | r(S-O) (Å) | C-S-O (°) | r(O-B) (Å) | r(S-C) (Å) | r(C-Br) (Å) | Br-C-S (°) |
|-------------------------------|------------|-----------|------------|------------|-------------|------------|
| <b>1</b>                      | 1.608      | 106.82    |            |            |             |            |
| <b>1.2a.C</b>                 | 1.660      | 102.87    | 1.556      |            |             |            |
| <b>1.2a.C.TS</b>              | 1.630      | 103.10    | 1.610      | 2.739      | 2.667       | 156.74     |
| <b>1.2a.TS</b>                | 1.582      | 106.64    | 5.759      | 2.917      | 2.379       | 157.44     |
| <b>1.2b.C</b>                 | 1.661      | 102.84    | 1.505      |            |             |            |
| <b>1.2b.C.TS</b>              | 1.635      | 102.75    | 1.536      | 2.642      | 2.721       | 156.47     |
| <b>1.2b.TS</b>                | 1.577      | 106.68    | 5.546      | 2.926      | 2.351       | 162.39     |
| <b>1.2c.C</b>                 | 1.652      | 103.68    | 1.585      |            |             |            |
| <b>1.2c.C.TS</b>              | 1.625      | 103.93    | 1.623      | 2.761      | 2.567       | 155.54     |
| <b>1.2c.TS</b>                | 1.582      | 106.57    | 5.279      | 2.889      | 2.389       | 155.55     |
| <b>1.2Ca.C</b>                | 1.653      | 103.73    | 1.550      |            |             |            |
| <b>1.2Ca.C.TS</b>             | 1.625      | 107.17    | 1.591      | 2.673      | 2.629       | 159.02     |
| <b>1.2Ca.TS</b>               | 1.582      | 106.66    | 4.850      | 2.959      | 2.383       | 159.49     |
| <b>1.2C<sub>2</sub>a.C</b>    | 1.654      | 103.52    | 1.566      |            |             |            |
| <b>1.2C<sub>2</sub>a.C.TS</b> | 1.614      | 107.31    | 1.626      | 2.698      | 2.643       | 162.72     |
| <b>1.2C<sub>2</sub>a.TS</b>   | 1.582      | 106.57    | 5.799      | 2.974      | 2.393       | 158.16     |
| <b>1.3a.C</b>                 | 1.660      | 102.65    | 1.558      |            |             |            |
| <b>1.3a.C.TS</b>              | 1.633      | 101.48    | 1.589      | 2.601      | 2.571       | 156.85     |
| <b>1.3a.TS</b>                | 1.584      | 106.46    | 5.746      | 2.805      | 2.495       | 161.14     |
| <b>1.4a.C</b>                 | 1.659      | 102.96    | 1.559      |            |             |            |
| <b>1.4a.C.TS</b>              | 1.635      | 100.86    | 1.595      | 2.621      | 2.516       | 156.24     |
| <b>1.4a.TS</b>                | 1.583      | 106.43    | 6.024      | 2.805      | 2.477       | 160.27     |
| <b>1.5a.C</b>                 | 1.654      | 103.35    | 1.569      |            |             |            |
| <b>1.5a.C.TS</b>              | 1.627      | 105.46    | 1.583      | 2.611      | 2.534       | 157.54     |
| <b>1.5a.TS</b>                | 1.583      | 106.40    | 4.423      | 2.815      | 2.477       | 162.57     |
| <b>1.3a.TS2</b>               | 1.578      | 106.92    | 7.477      | 2.714      | 2.471       | 151.98     |
| <b>1.4a.TS2</b>               | 1.580      | 106.73    | 5.422      | 2.722      | 2.438       | 154.440    |
| <b>1.5a.TS2</b>               | 1.579      | 106.78    | 6.518      | 2.712      | 2.436       | 156.11     |

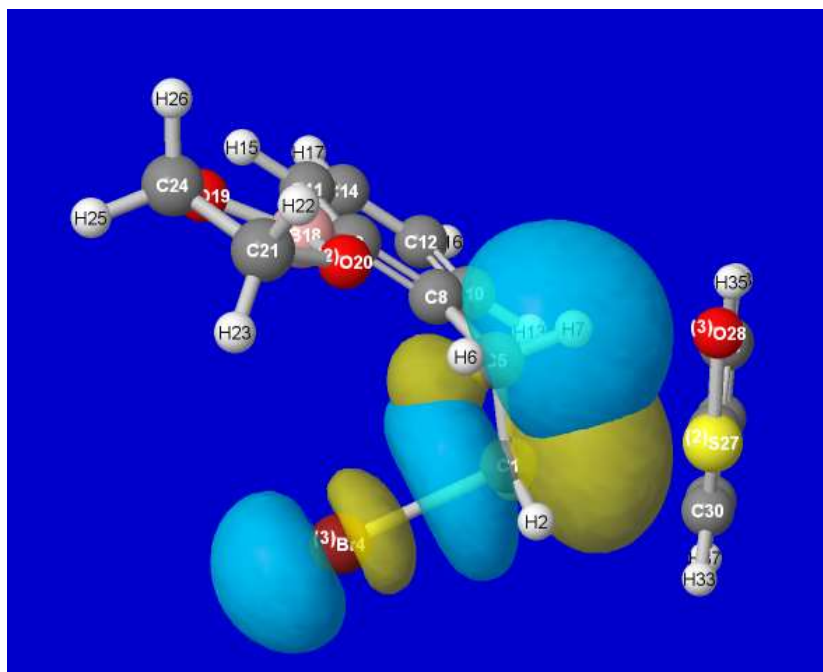

**Figure S1.** NBO representation of alkyl transition state hyperconjugation [ $\sigma_{\text{C-H}} \rightarrow \sigma^*_{\text{C-Br}}$ ] of **1.3a.TS**.

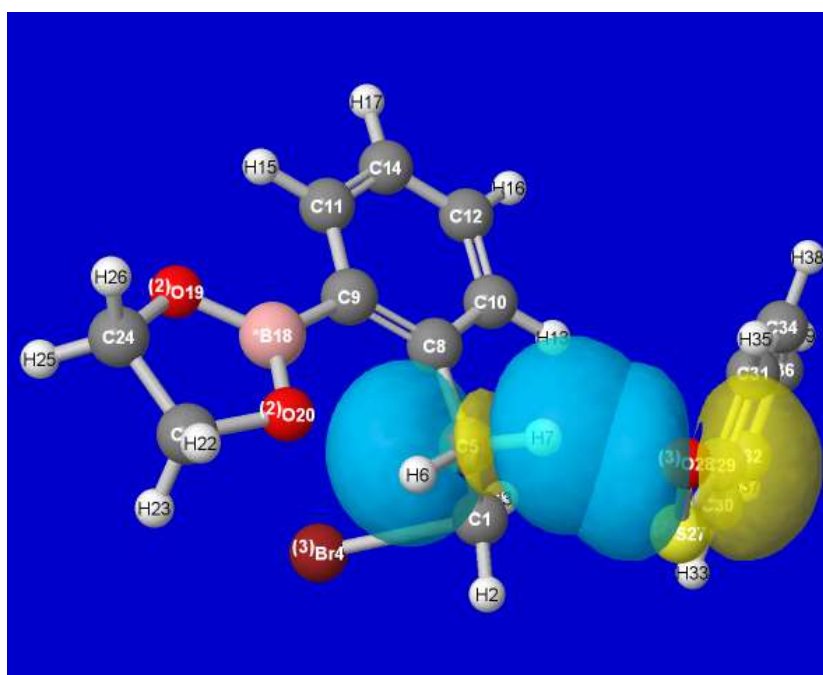

**Figure S2.** NBO representation H-bonding during alkylation transition state of **1.3a.TS**. [ $n_{\text{O}} \rightarrow \sigma^*_{\text{C-H}}$ ]

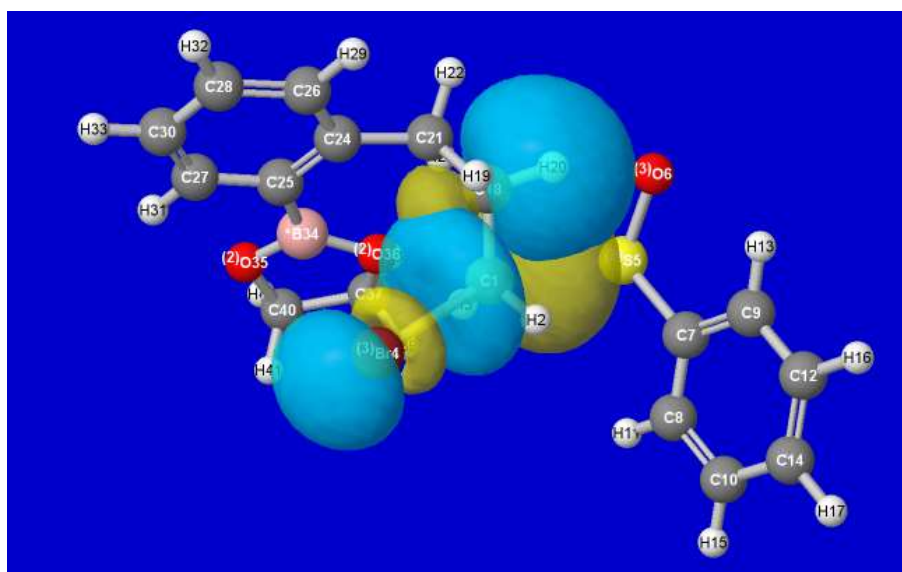

Figure S3. NBO representation of alkyl transition state hyperconjugation [ $\sigma_{\text{C-H}} \rightarrow \sigma^*_{\text{C-Br}}$ ] of **1.4a.TS**.

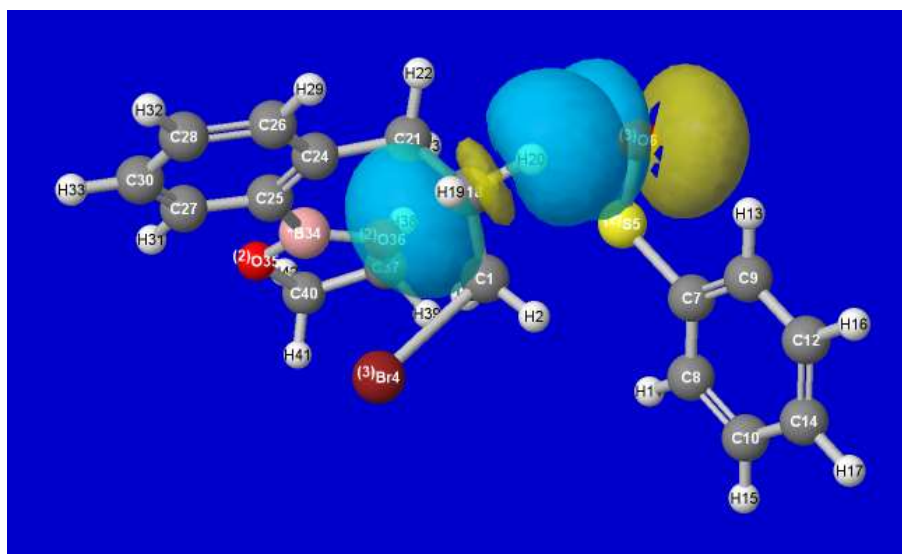

Figure S4. NBO representation H-bonding during alkyl transition state of **1.4a.TS**. [ $n_{\text{O}} \rightarrow \sigma^*_{\text{C-H}}$ ]

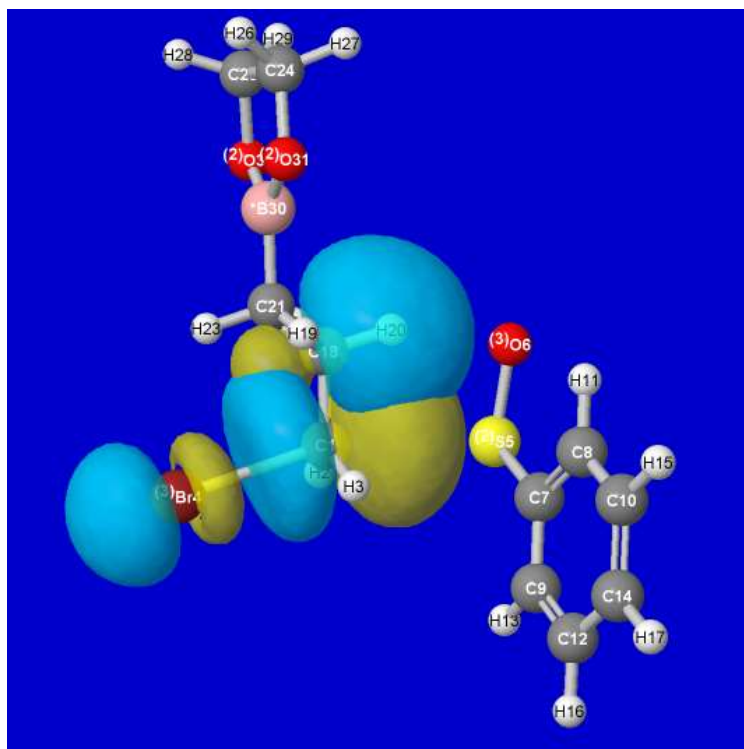

Figure S5. NBO representation of alkylation transition state hyperconjugation [ $\sigma_{C-H} \rightarrow \sigma^*_{C-Br}$ ] of **1.5a.TS**.

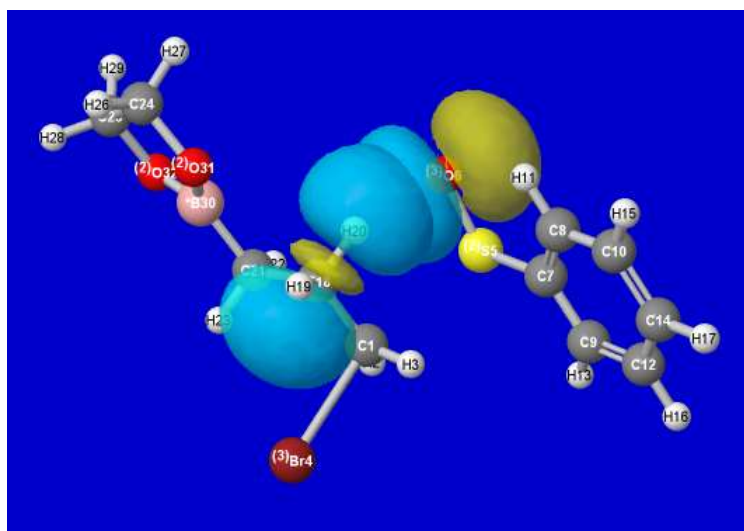

Figure S6. NBO representation H-bonding during alkylation transition state of **1.5a.TS**. [ $n_{O} \rightarrow \sigma^*_{C-H}$ ]

# Cartesian Coordinates and Thermochemistry Data of Structures and Transition States

Methyl sulfenate

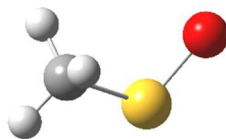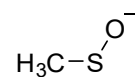

| -1 1 |  |             |             |             |
|------|--|-------------|-------------|-------------|
| S    |  | 0.19133800  | -0.54633800 | 0.00000000  |
| C    |  | -1.40664400 | 0.35176800  | 0.00000000  |
| H    |  | -2.20805100 | -0.39414800 | 0.00000000  |
| H    |  | -1.49874000 | 0.97862700  | 0.89232500  |
| H    |  | -1.49874100 | 0.97862700  | -0.89232600 |
| O    |  | 1.32299800  | 0.63346200  | 0.00000000  |

|                                              |             |
|----------------------------------------------|-------------|
| Zero-point correction=                       | 0.039081    |
| (Hartree/Particle)                           |             |
| Thermal correction to Energy=                | 0.043215    |
| Thermal correction to Enthalpy=              | 0.044159    |
| Thermal correction to Gibbs Free Energy=     | 0.012900    |
| Sum of electronic and zero-point Energies=   | -513.432167 |
| Sum of electronic and thermal Energies=      | -513.428033 |
| Sum of electronic and thermal Enthalpies=    | -513.427089 |
| Sum of electronic and thermal Free Energies= | -513.458348 |

Methyl sulfenate S coordinated with PhB(OH)<sub>2</sub>

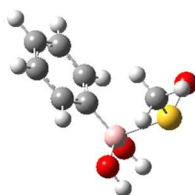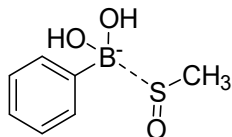

| -1 1 |  |             |             |            |
|------|--|-------------|-------------|------------|
| C    |  | -1.53050200 | -1.76297700 | 1.08961700 |
| H    |  | -1.55329300 | -1.29222800 | 2.07364300 |
| H    |  | -0.51219600 | -2.06962500 | 0.84295900 |
| H    |  | -2.19972100 | -2.62441900 | 1.07209100 |



|   |             |             |             |
|---|-------------|-------------|-------------|
| S | -2.11593600 | -0.54251600 | -0.13657000 |
| O | -1.96778500 | -1.25577000 | -1.54117300 |
| B | -0.72659700 | 1.08197700  | 0.16239900  |
| C | 0.75598600  | 0.49918000  | 0.05374400  |
| C | 1.38671900  | 0.33236400  | -1.19224500 |
| C | 1.48920200  | 0.12132000  | 1.19264300  |
| C | 2.67768500  | -0.18759300 | -1.29953400 |
| H | 0.85521500  | 0.62058600  | -2.09260300 |
| C | 2.78180200  | -0.39747600 | 1.09770800  |
| H | 1.03856500  | 0.24450500  | 2.17190400  |
| C | 3.38252700  | -0.55613500 | -0.15231800 |
| H | 3.13572900  | -0.30350000 | -2.27700200 |
| H | 3.32216100  | -0.67589800 | 1.99734100  |
| H | 4.38682300  | -0.95931200 | -0.23128000 |
| O | -1.07856000 | 1.49040800  | 1.50502700  |
| H | -1.92288500 | 1.95004600  | 1.53323500  |
| O | -1.04831200 | 1.99135300  | -0.90941800 |
| H | -1.96570200 | 2.28018300  | -0.89034300 |

Zero-point correction= 0.164068  
(Hartree/Particle)  
Thermal correction to Energy= 0.177391  
Thermal correction to Enthalpy= 0.178335  
Thermal correction to Gibbs Free Energy= 0.124159  
Sum of electronic and zero-point Energies= -921.709675  
Sum of electronic and thermal Energies= -921.696352  
Sum of electronic and thermal Enthalpies= -921.695408  
Sum of electronic and thermal Free Energies= -921.749584

### Methyl sulfenate O coordinated with PhB(OH)<sub>2</sub>

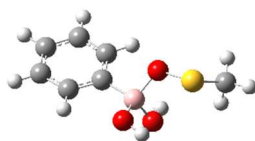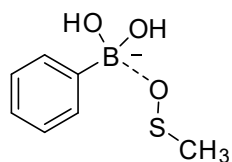

|    |             |             |             |
|----|-------------|-------------|-------------|
| -1 | 1           |             |             |
| B  | 0.41905300  | 0.62545100  | 0.29354000  |
| O  | 0.58387200  | 2.03414300  | -0.05349600 |
| H  | 1.46521000  | 2.31490200  | 0.21275100  |
| O  | 0.88626200  | 0.44465800  | 1.69273700  |
| H  | 0.80719900  | -0.47729900 | 1.95289200  |
| C  | -1.13121000 | 0.15777200  | 0.07469000  |
| C  | -2.16580100 | 1.09006400  | -0.11070700 |
| C  | -1.50863600 | -1.19698900 | 0.11076800  |
| C  | -3.50090300 | 0.70005800  | -0.24963700 |

|   |             |             |             |
|---|-------------|-------------|-------------|
| H | -1.91529600 | 2.14538300  | -0.14795200 |
| C | -2.83773500 | -1.60255100 | -0.02634900 |
| H | -0.74280600 | -1.95671000 | 0.24085400  |
| C | -3.84439900 | -0.65175400 | -0.20769000 |
| H | -4.27335200 | 1.45017700  | -0.39225900 |
| H | -3.08968900 | -2.65852700 | 0.00484000  |
| H | -4.87906300 | -0.96054300 | -0.31627300 |
| O | 1.23083100  | -0.29383900 | -0.64126400 |
| S | 2.87322500  | -0.00869700 | -0.79785600 |
| C | 3.59866700  | -1.18030400 | 0.39325000  |
| H | 3.28701300  | -2.20127100 | 0.16456400  |
| H | 4.68318600  | -1.10295200 | 0.27430000  |
| H | 3.32312700  | -0.91871500 | 1.41450300  |

|                                              |             |
|----------------------------------------------|-------------|
| Zero-point correction=                       | 0.164253    |
| (Hartree/Particle)                           |             |
| Thermal correction to Energy=                | 0.177391    |
| Thermal correction to Enthalpy=              | 0.178335    |
| Thermal correction to Gibbs Free Energy=     | 0.123883    |
| Sum of electronic and zero-point Energies=   | -921.735146 |
| Sum of electronic and thermal Energies=      | -921.722007 |
| Sum of electronic and thermal Enthalpies=    | -921.721063 |
| Sum of electronic and thermal Free Energies= | -921.775516 |

### Methyl sulfenate S coordinated with MeB(EG)

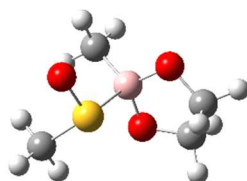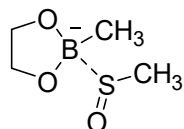

|    |             |             |             |
|----|-------------|-------------|-------------|
| -1 | 1           |             |             |
| C  | -2.08373600 | 0.82247000  | 1.16250700  |
| H  | -2.96139300 | 1.44948700  | 0.99792100  |
| H  | -1.38734000 | 1.32232200  | 1.83779900  |
| H  | -2.38761900 | -0.13983300 | 1.57973900  |
| S  | -1.23305000 | 0.55789800  | -0.43416400 |
| B  | 0.44831100  | -0.61025600 | 0.21535200  |
| C  | -0.10521100 | -1.99168900 | 0.79195800  |
| H  | 0.73547600  | -2.64059100 | 1.07220300  |
| H  | -0.72235700 | -1.85946800 | 1.68703700  |
| H  | -0.70653800 | -2.53310600 | 0.05438800  |
| O  | -2.24065800 | -0.30897700 | -1.30290000 |
| O  | 1.29519000  | -0.71057700 | -0.95681400 |
| O  | 1.10826500  | 0.30453300  | 1.13963200  |
| C  | 2.12953400  | 0.44444500  | -0.97138500 |
| H  | 1.64916000  | 1.25778500  | -1.53171900 |

|   |            |            |             |
|---|------------|------------|-------------|
| H | 3.08245300 | 0.20757600 | -1.45270900 |
| C | 2.28430500 | 0.81560300 | 0.51179500  |
| H | 2.36142400 | 1.89652000 | 0.66745300  |
| H | 3.17226000 | 0.33941200 | 0.94915200  |

|                                              |             |
|----------------------------------------------|-------------|
| Zero-point correction=                       | 0.146315    |
| (Hartree/Particle)                           |             |
| Thermal correction to Energy=                | 0.157604    |
| Thermal correction to Enthalpy=              | 0.158548    |
| Thermal correction to Gibbs Free Energy=     | 0.108980    |
| Sum of electronic and zero-point Energies=   | -807.349411 |
| Sum of electronic and thermal Energies=      | -807.338123 |
| Sum of electronic and thermal Enthalpies=    | -807.337179 |
| Sum of electronic and thermal Free Energies= | -807.386746 |

### Methyl sulfenate O coordinated with MeB(EG)

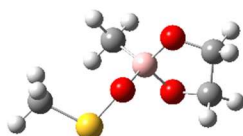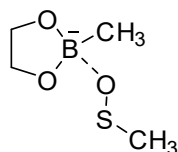

|      |             |             |             |
|------|-------------|-------------|-------------|
| -1 1 |             |             |             |
| C    | -3.17851500 | 0.30301100  | 0.36346000  |
| H    | -4.11501700 | -0.04277500 | -0.08343600 |
| H    | -2.95900200 | 1.31073700  | 0.00885800  |
| H    | -3.27868400 | 0.30033400  | 1.45059400  |
| S    | -1.89535600 | -0.87657400 | -0.16401400 |
| O    | -0.55313400 | -0.32936200 | 0.66605700  |
| B    | 0.51863800  | 0.49959200  | -0.08194200 |
| C    | -0.08721900 | 1.86338300  | -0.70525500 |
| H    | 0.69891900  | 2.44614800  | -1.20185100 |
| H    | -0.87083000 | 1.67647700  | -1.44965500 |
| H    | -0.52324100 | 2.50231100  | 0.07301800  |
| O    | 1.55882400  | 0.72711700  | 0.95517600  |
| O    | 1.19160300  | -0.34054100 | -1.10418200 |
| C    | 2.21137300  | -1.05332500 | -0.42503900 |
| H    | 1.81300100  | -1.97170200 | 0.03335100  |
| H    | 3.00599400  | -1.33717200 | -1.12376000 |
| C    | 2.69100300  | -0.07544500 | 0.65899200  |
| H    | 3.51282100  | 0.55276700  | 0.28032400  |
| H    | 3.05035700  | -0.59336500 | 1.55713500  |

|                                 |          |
|---------------------------------|----------|
| Zero-point correction=          | 0.146814 |
| (Hartree/Particle)              |          |
| Thermal correction to Energy=   | 0.157573 |
| Thermal correction to Enthalpy= | 0.158517 |

|                                              |             |
|----------------------------------------------|-------------|
| Thermal correction to Gibbs Free Energy=     | 0.110165    |
| Sum of electronic and zero-point Energies=   | -807.372902 |
| Sum of electronic and thermal Energies=      | -807.362144 |
| Sum of electronic and thermal Enthalpies=    | -807.361199 |
| Sum of electronic and thermal Free Energies= | -807.409551 |

### Methyl sulfenate S coordinated with Me<sub>3</sub>B

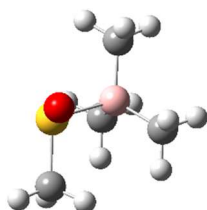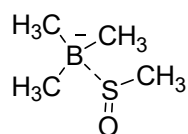

|      |             |             |             |
|------|-------------|-------------|-------------|
| -1 1 |             |             |             |
| B    | 0.99164000  | 0.04694800  | -0.05899800 |
| S    | -0.94554300 | -0.22878800 | 0.51836800  |
| C    | -1.78409500 | 1.25547100  | -0.14563100 |
| H    | -1.36830500 | 2.14266800  | 0.33447200  |
| H    | -1.64255700 | 1.30789900  | -1.22662500 |
| H    | -2.84637900 | 1.17383400  | 0.08844300  |
| O    | -1.61237800 | -1.43443800 | -0.26207700 |
| C    | 1.05970600  | 0.22234600  | -1.67341800 |
| H    | 0.56007200  | 1.12660200  | -2.04607800 |
| H    | 2.11078300  | 0.29989000  | -1.99017500 |
| H    | 0.63463200  | -0.63173400 | -2.21651100 |
| C    | 1.74054600  | -1.30411300 | 0.46439100  |
| H    | 1.38898500  | -2.21670900 | -0.03354100 |
| H    | 2.81835000  | -1.22965600 | 0.25738700  |
| H    | 1.64190500  | -1.46732800 | 1.54698600  |
| C    | 1.46975900  | 1.37330300  | 0.76668700  |
| H    | 2.55452300  | 1.50239500  | 0.63845900  |
| H    | 1.00609700  | 2.30732800  | 0.42281900  |
| H    | 1.29590600  | 1.30415100  | 1.84991000  |

|                                              |             |
|----------------------------------------------|-------------|
| Zero-point correction=                       | 0.154665    |
| (Hartree/Particle)                           |             |
| Thermal correction to Energy=                | 0.165681    |
| Thermal correction to Enthalpy=              | 0.166625    |
| Thermal correction to Gibbs Free Energy=     | 0.119388    |
| Sum of electronic and zero-point Energies=   | -657.996037 |
| Sum of electronic and thermal Energies=      | -657.985021 |
| Sum of electronic and thermal Enthalpies=    | -657.984077 |
| Sum of electronic and thermal Free Energies= | -658.031314 |

### Methyl sulfenate O coordinated with Me<sub>3</sub>B

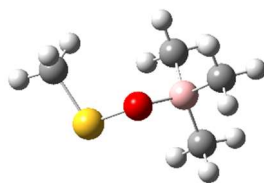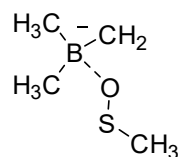

|    |   |             |             |             |
|----|---|-------------|-------------|-------------|
| -1 | 1 |             |             |             |
| C  |   | -2.53731000 | 0.79683600  | 0.01334600  |
| H  |   | -3.51323900 | 0.51980400  | -0.39613600 |
| H  |   | -2.07391600 | 1.54743600  | -0.62779500 |
| H  |   | -2.67319000 | 1.19680000  | 1.02041000  |
| S  |   | -1.54688400 | -0.73232800 | 0.06011700  |
| O  |   | -0.14677500 | -0.23055200 | 0.81124600  |
| B  |   | 1.15157700  | 0.07856000  | -0.02846000 |
| C  |   | 0.86170500  | 1.27261500  | -1.11683700 |
| H  |   | 1.77274400  | 1.51875700  | -1.68213400 |
| H  |   | 0.09978700  | 0.99802400  | -1.86055000 |
| H  |   | 0.52477200  | 2.20540800  | -0.64042800 |
| C  |   | 1.66200900  | -1.29554200 | -0.76637900 |
| H  |   | 0.93369000  | -1.68241600 | -1.49378100 |
| H  |   | 2.59947400  | -1.13355500 | -1.31894100 |
| H  |   | 1.85581000  | -2.10466800 | -0.04603000 |
| C  |   | 2.21195600  | 0.56558000  | 1.12223400  |
| H  |   | 1.86849200  | 1.46420000  | 1.65579700  |
| H  |   | 2.39136000  | -0.20982000 | 1.88141000  |
| H  |   | 3.19052000  | 0.81196600  | 0.68443500  |

|                                              |             |
|----------------------------------------------|-------------|
| Zero-point correction=                       | 0.154105    |
| (Hartree/Particle)                           |             |
| Thermal correction to Energy=                | 0.165082    |
| Thermal correction to Enthalpy=              | 0.166026    |
| Thermal correction to Gibbs Free Energy=     | 0.118642    |
| Sum of electronic and zero-point Energies=   | -658.011229 |
| Sum of electronic and thermal Energies=      | -658.000253 |
| Sum of electronic and thermal Enthalpies=    | -657.999308 |
| Sum of electronic and thermal Free Energies= | -658.046692 |

Methyl sulfenate S coordinated with BF<sub>3</sub>

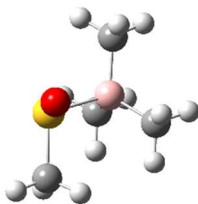

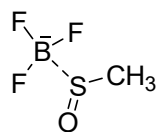

|   | -1          | 1           |             |
|---|-------------|-------------|-------------|
| B | -0.97097000 | 0.01617700  | 0.02965600  |
| S | 0.93423600  | -0.23142200 | -0.51728500 |
| C | 1.60052500  | 1.32336500  | 0.17926000  |
| H | 1.12201300  | 2.16094600  | -0.33097100 |
| H | 1.39292000  | 1.35661900  | 1.24930500  |
| H | 2.67493900  | 1.33953500  | -0.00265600 |
| O | 1.55327800  | -1.39203700 | 0.33960100  |
| F | -1.05554000 | 0.23375600  | 1.40684000  |
| F | -1.43630700 | 1.13023000  | -0.68758600 |
| F | -1.65395100 | -1.14611100 | -0.33923000 |

|                                              |             |
|----------------------------------------------|-------------|
| Zero-point correction=                       | 0.053122    |
| (Hartree/Particle)                           |             |
| Thermal correction to Energy=                | 0.061327    |
| Thermal correction to Enthalpy=              | 0.062271    |
| Thermal correction to Gibbs Free Energy=     | 0.019912    |
| Sum of electronic and zero-point Energies=   | -838.131926 |
| Sum of electronic and thermal Energies=      | -838.123721 |
| Sum of electronic and thermal Enthalpies=    | -838.122777 |
| Sum of electronic and thermal Free Energies= | -838.165136 |

### Methyl sulfenate O coordinated with BF<sub>3</sub>

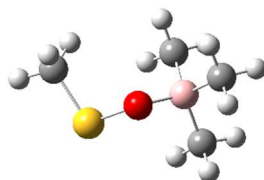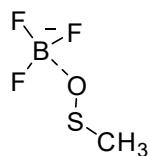

|   | -1          | 1           |             |
|---|-------------|-------------|-------------|
| B | 1.10131300  | 0.06332200  | -0.01010000 |
| F | 0.83872300  | 1.19690300  | 0.80914000  |
| F | 1.54982400  | -0.99289400 | 0.82880800  |
| O | -0.06579900 | -0.32294200 | -0.80326600 |
| S | -1.48156000 | -0.72882600 | 0.00953600  |
| F | 2.12489800  | 0.38614700  | -0.93395000 |
| C | -2.36782900 | 0.85757300  | -0.00375400 |
| H | -3.33443700 | 0.66427900  | 0.46952000  |
| H | -1.82363600 | 1.60819800  | 0.56821800  |
| H | -2.53118300 | 1.19881600  | -1.02714900 |

|                        |          |
|------------------------|----------|
| Zero-point correction= | 0.053582 |
| (Hartree/Particle)     |          |

|                                              |             |
|----------------------------------------------|-------------|
| Thermal correction to Energy=                | 0.061656    |
| Thermal correction to Enthalpy=              | 0.062601    |
| Thermal correction to Gibbs Free Energy=     | 0.019961    |
| Sum of electronic and zero-point Energies=   | -838.171672 |
| Sum of electronic and thermal Energies=      | -838.163597 |
| Sum of electronic and thermal Enthalpies=    | -838.162653 |
| Sum of electronic and thermal Free Energies= | -838.205293 |

### Methyl sulfenate with K<sup>+</sup> counterion

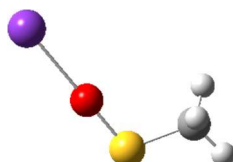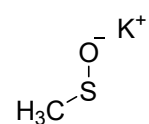

|     |             |             |             |
|-----|-------------|-------------|-------------|
| 0 1 |             |             |             |
| C   | 2.33213600  | 1.00184300  | 0.00022500  |
| H   | 3.41586300  | 0.85342900  | -0.02705000 |
| H   | 2.06924400  | 1.55777700  | 0.90467400  |
| H   | 2.02700100  | 1.57285100  | -0.88124300 |
| S   | 1.55440200  | -0.65091100 | -0.00009200 |
| O   | -0.05087800 | -0.32415400 | 0.00078600  |
| K   | -2.41938600 | 0.15856300  | -0.00013400 |

|                                              |              |
|----------------------------------------------|--------------|
| Zero-point correction=                       | 0.040027     |
| (Hartree/Particle)                           |              |
| Thermal correction to Energy=                | 0.046378     |
| Thermal correction to Enthalpy=              | 0.047322     |
| Thermal correction to Gibbs Free Energy=     | 0.007745     |
| Sum of electronic and zero-point Energies=   | -1113.339599 |
| Sum of electronic and thermal Energies=      | -1113.333248 |
| Sum of electronic and thermal Enthalpies=    | -1113.332304 |
| Sum of electronic and thermal Free Energies= | -1113.371880 |

### Methyl sulfenate with Li<sup>+</sup> counterion

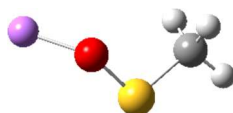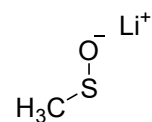

|     |            |            |             |
|-----|------------|------------|-------------|
| 0 1 |            |            |             |
| C   | 1.49125000 | 0.63386700 | -0.02974200 |

|    |             |             |             |
|----|-------------|-------------|-------------|
| H  | 2.43459000  | 0.13474900  | -0.26969400 |
| H  | 1.56491400  | 1.08040000  | 0.96506100  |
| H  | 1.29906500  | 1.41416000  | -0.77065300 |
| S  | 0.18650100  | -0.63882300 | -0.06718200 |
| O  | -1.16197000 | 0.20223400  | 0.34799400  |
| Li | -2.64477200 | 0.72359500  | -0.48510100 |

|                                              |             |
|----------------------------------------------|-------------|
| Zero-point correction=                       | 0.041091    |
| (Hartree/Particle)                           |             |
| Thermal correction to Energy=                | 0.046931    |
| Thermal correction to Enthalpy=              | 0.047875    |
| Thermal correction to Gibbs Free Energy=     | 0.011835    |
| Sum of electronic and zero-point Energies=   | -520.939104 |
| Sum of electronic and thermal Energies=      | -520.933264 |
| Sum of electronic and thermal Enthalpies=    | -520.932320 |
| Sum of electronic and thermal Free Energies= | -520.968361 |

### Methyl sulfenate O coordinated with Me<sub>3</sub>B, with K<sup>+</sup>

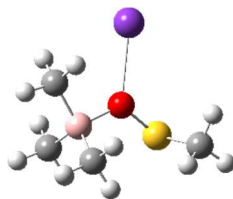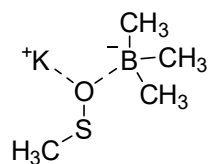

|   |             |             |             |  |
|---|-------------|-------------|-------------|--|
| 0 | 1           |             |             |  |
| C | -0.61730200 | -2.61159700 | 0.77736000  |  |
| H | -0.83841700 | -3.62447700 | 0.42896500  |  |
| H | -1.45770900 | -2.23702900 | 1.36120500  |  |
| H | 0.28708200  | -2.63460000 | 1.38822200  |  |
| S | -0.36197700 | -1.61011100 | -0.72291000 |  |
| O | 0.08795200  | -0.12557100 | -0.09799700 |  |
| B | -0.95350000 | 1.06878700  | 0.05550400  |  |
| C | -2.13079800 | 0.64650300  | 1.10850800  |  |
| H | -2.82879000 | 1.48057100  | 1.26915000  |  |
| H | -2.73740700 | -0.19901300 | 0.75455900  |  |
| H | -1.73798100 | 0.37005400  | 2.09787900  |  |
| C | -0.00968100 | 2.26974600  | 0.65519300  |  |
| H | 0.48522100  | 1.99690700  | 1.60002800  |  |
| H | 0.77199900  | 2.59818300  | -0.04853600 |  |
| H | -0.60998200 | 3.16359600  | 0.87172700  |  |
| C | -1.55047900 | 1.45680300  | -1.41591200 |  |
| H | -2.21899700 | 2.32763400  | -1.35674600 |  |
| H | -0.75835400 | 1.71681200  | -2.13395500 |  |
| H | -2.13722800 | 0.64387600  | -1.86558600 |  |
| K | 2.60450700  | 0.27637700  | 0.05027400  |  |



|                                              |              |
|----------------------------------------------|--------------|
| Zero-point correction=                       | 0.155217     |
| (Hartree/Particle)                           |              |
| Thermal correction to Energy=                | 0.168432     |
| Thermal correction to Enthalpy=              | 0.169376     |
| Thermal correction to Gibbs Free Energy=     | 0.114426     |
| Sum of electronic and zero-point Energies=   | -1257.911184 |
| Sum of electronic and thermal Energies=      | -1257.897969 |
| Sum of electronic and thermal Enthalpies=    | -1257.897025 |
| Sum of electronic and thermal Free Energies= | -1257.951975 |

Methyl sulfenate O coordinated with Me<sub>3</sub>B, with Li<sup>+</sup>

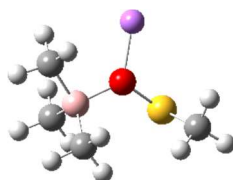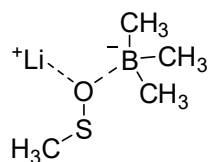

|    |   |             |             |             |
|----|---|-------------|-------------|-------------|
| 0  | 1 |             |             |             |
| C  |   | 2.52180900  | -0.53300500 | 0.65552100  |
| H  |   | 3.49437800  | -0.76038400 | 0.21008700  |
| H  |   | 2.03678100  | -1.45957900 | 0.96064500  |
| H  |   | 2.66906600  | 0.12134200  | 1.51635300  |
| S  |   | 1.56692500  | 0.30798900  | -0.64582800 |
| O  |   | 0.14643000  | 0.70915700  | 0.15723100  |
| B  |   | -1.18743000 | -0.18191500 | 0.00785000  |
| C  |   | -0.89275800 | -1.68546300 | 0.56777600  |
| H  |   | -1.80187700 | -2.30102300 | 0.51691400  |
| H  |   | -0.12797800 | -2.21802500 | -0.01439600 |
| H  |   | -0.56559000 | -1.69400400 | 1.61754100  |
| Li |   | 0.13605200  | 2.40677300  | 0.91730800  |
| C  |   | -2.24276900 | 0.63124500  | 0.95892900  |
| H  |   | -1.90104100 | 0.72240100  | 2.00139300  |
| H  |   | -2.46650900 | 1.64622900  | 0.59515900  |
| H  |   | -3.20684900 | 0.10659100  | 0.99658700  |
| C  |   | -1.64306600 | -0.17186800 | -1.55828200 |
| H  |   | -2.58666900 | -0.71800800 | -1.69831000 |
| H  |   | -1.80910400 | 0.84584200  | -1.94131100 |
| H  |   | -0.90715600 | -0.64864800 | -2.22011100 |

|                                            |             |
|--------------------------------------------|-------------|
| Zero-point correction=                     | 0.156867    |
| (Hartree/Particle)                         |             |
| Thermal correction to Energy=              | 0.169150    |
| Thermal correction to Enthalpy=            | 0.170094    |
| Thermal correction to Gibbs Free Energy=   | 0.120161    |
| Sum of electronic and zero-point Energies= | -665.505721 |

Sum of electronic and thermal Energies= -665.493437  
 Sum of electronic and thermal Enthalpies= -665.492493  
 Sum of electronic and thermal Free Energies= -665.542427

Methyl sulfenate S coordinated with Me<sub>3</sub>B, with K<sup>+</sup>

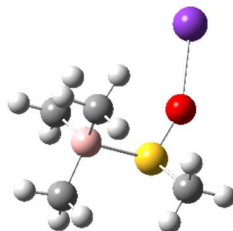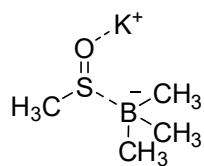

|   |   |             |             |             |
|---|---|-------------|-------------|-------------|
| 0 | 1 |             |             |             |
| C |   | -1.09987000 | -2.24620100 | 0.37735100  |
| H |   | -0.57117900 | -3.15589200 | 0.09099400  |
| H |   | -2.16430100 | -2.35781900 | 0.16597100  |
| H |   | -0.94473900 | -2.03600000 | 1.43644900  |
| S |   | -0.45136100 | -0.87048400 | -0.62909400 |
| B |   | -1.45636700 | 0.76341300  | 0.07956700  |
| C |   | -1.22537100 | 0.87356000  | 1.68292400  |
| H |   | -1.67855100 | 1.80429600  | 2.05459400  |
| H |   | -1.68427000 | 0.05852500  | 2.25761700  |
| H |   | -0.16438400 | 0.91187300  | 1.96263900  |
| O |   | 1.07988500  | -0.78394200 | -0.20492400 |
| K |   | 3.25592400  | 0.32306000  | 0.09391800  |
| C |   | -3.00536100 | 0.49283100  | -0.35121500 |
| H |   | -3.59725500 | 1.39345600  | -0.13319900 |
| H |   | -3.48563600 | -0.32907400 | 0.19540500  |
| H |   | -3.13753400 | 0.29219000  | -1.42345500 |
| C |   | -0.78386400 | 1.99551400  | -0.74905700 |
| H |   | 0.28041100  | 2.14253700  | -0.52230500 |
| H |   | -0.87253600 | 1.89196300  | -1.83940700 |
| H |   | -1.29124900 | 2.93380300  | -0.48270900 |

Zero-point correction= 0.155537  
 (Hartree/Particle)  
 Thermal correction to Energy= 0.168876  
 Thermal correction to Enthalpy= 0.169820  
 Thermal correction to Gibbs Free Energy= 0.113929  
 Sum of electronic and zero-point Energies= -1257.899088  
 Sum of electronic and thermal Energies= -1257.885749  
 Sum of electronic and thermal Enthalpies= -1257.884805  
 Sum of electronic and thermal Free Energies= -1257.940696

Methyl sulfenate S coordinated with Me<sub>3</sub>B, with Li<sup>+</sup>

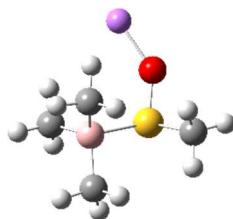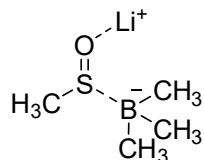

| 0  | 1 |             |             |             |
|----|---|-------------|-------------|-------------|
| C  |   | 1.40602600  | -1.70251400 | 0.29778200  |
| H  |   | 2.45076900  | -1.87969700 | 0.04188200  |
| H  |   | 0.80008000  | -2.55037100 | -0.02398000 |
| H  |   | 1.29839700  | -1.54520200 | 1.37145800  |
| S  |   | 0.84461100  | -0.22679000 | -0.60613400 |
| B  |   | -1.06550100 | 0.07866100  | 0.07071600  |
| C  |   | -1.02874200 | 0.23331300  | 1.68531900  |
| H  |   | -2.03693000 | 0.47933700  | 2.04896800  |
| H  |   | -0.72614000 | -0.67884900 | 2.21547200  |
| H  |   | -0.37106600 | 1.04276900  | 2.02922400  |
| O  |   | 1.80337600  | 0.91672600  | -0.03880500 |
| C  |   | -1.87605800 | -1.23272500 | -0.45790300 |
| H  |   | -2.94831500 | -1.08334200 | -0.26763100 |
| H  |   | -1.60083400 | -2.16536200 | 0.05067000  |
| H  |   | -1.77910400 | -1.40837300 | -1.53808600 |
| C  |   | -1.51749100 | 1.44168100  | -0.69917100 |
| H  |   | -0.94889400 | 2.33241900  | -0.39967600 |
| H  |   | -1.45502700 | 1.36982600  | -1.79344700 |
| H  |   | -2.56896500 | 1.65623900  | -0.46117900 |
| Li |   | 1.79011500  | 2.63120200  | 0.47505900  |

|                                              |             |
|----------------------------------------------|-------------|
| Zero-point correction=                       | 0.157226    |
| (Hartree/Particle)                           |             |
| Thermal correction to Energy=                | 0.169643    |
| Thermal correction to Enthalpy=              | 0.170587    |
| Thermal correction to Gibbs Free Energy=     | 0.120392    |
| Sum of electronic and zero-point Energies=   | -665.496431 |
| Sum of electronic and thermal Energies=      | -665.484014 |
| Sum of electronic and thermal Enthalpies=    | -665.483070 |
| Sum of electronic and thermal Free Energies= | -665.533265 |

Methyl sulfenate O coordinated with MeB(EG), with K<sup>+</sup>

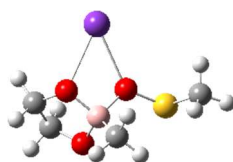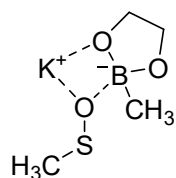

| 0 | 1 |             |             |             |
|---|---|-------------|-------------|-------------|
| C |   | 3.24709400  | -0.05792500 | 0.35213500  |
| H |   | 4.20962300  | -0.42165600 | -0.01817400 |
| H |   | 3.03628600  | -0.51609500 | 1.31849200  |
| H |   | 3.29123200  | 1.02851000  | 0.44817000  |
| S |   | 2.01729400  | -0.54950900 | -0.89623600 |
| O |   | 0.60965800  | 0.13553900  | -0.30124500 |
| B |   | -0.41546400 | -0.74399800 | 0.47244000  |
| C |   | 0.21144600  | -1.34273900 | 1.83205800  |
| H |   | -0.55011100 | -1.89160900 | 2.39951400  |
| H |   | 1.03421600  | -2.04182600 | 1.63986900  |
| H |   | 0.60080000  | -0.55407800 | 2.48767200  |
| O |   | -1.53658500 | 0.23344200  | 0.68475100  |
| O |   | -0.98697000 | -1.78132800 | -0.39985600 |
| C |   | -2.11669300 | -1.22097400 | -1.05021200 |
| H |   | -1.82298400 | -0.69217500 | -1.97013900 |
| H |   | -2.82617700 | -2.00916200 | -1.32084700 |
| C |   | -2.68231200 | -0.23790700 | -0.02022600 |
| H |   | -3.36779100 | -0.74826200 | 0.67147000  |
| H |   | -3.22234100 | 0.59731000  | -0.48109100 |
| K |   | -0.38043100 | 2.53774900  | 0.01320600  |

|                                              |              |
|----------------------------------------------|--------------|
| Zero-point correction=                       | 0.147929     |
| (Hartree/Particle)                           |              |
| Thermal correction to Energy=                | 0.160843     |
| Thermal correction to Enthalpy=              | 0.161787     |
| Thermal correction to Gibbs Free Energy=     | 0.107104     |
| Sum of electronic and zero-point Energies=   | -1407.278018 |
| Sum of electronic and thermal Energies=      | -1407.265104 |
| Sum of electronic and thermal Enthalpies=    | -1407.264160 |
| Sum of electronic and thermal Free Energies= | -1407.318843 |

Methyl sulfenate O coordinated with MeB(EG), with Li<sup>+</sup>

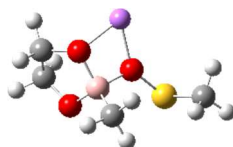

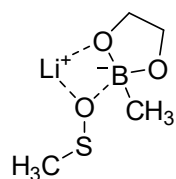

| Atom | x           | y           | z           |
|------|-------------|-------------|-------------|
| 0 1  |             |             |             |
| C    | -3.19153100 | 0.33742300  | 0.32720100  |
| H    | -4.14888000 | 0.05282000  | -0.11801200 |
| H    | -2.94506800 | 1.35695500  | 0.03173100  |
| H    | -3.26810600 | 0.26096100  | 1.41307500  |
| S    | -1.97808800 | -0.85257800 | -0.31936900 |
| O    | -0.58129500 | -0.40870200 | 0.49324100  |
| B    | 0.51433100  | 0.49402900  | -0.16274900 |
| C    | -0.06164400 | 1.92534800  | -0.60725400 |
| H    | 0.74793100  | 2.56978900  | -0.96974200 |
| H    | -0.79334500 | 1.84190500  | -1.41951000 |
| H    | -0.55134800 | 2.44989200  | 0.22145100  |
| O    | 1.48272900  | 0.52100300  | 1.00350200  |
| O    | 1.23137300  | -0.20706100 | -1.22288100 |
| C    | 2.29995800  | -0.93393900 | -0.63119000 |
| H    | 1.96615300  | -1.92882300 | -0.30090400 |
| H    | 3.10925000  | -1.06586400 | -1.35492400 |
| C    | 2.70963100  | -0.07475900 | 0.56816200  |
| H    | 3.41435400  | 0.71065600  | 0.26685800  |
| H    | 3.16042400  | -0.65445500 | 1.37936700  |
| Li   | 0.26181500  | -0.39636500 | 2.21394800  |

|                                              |             |
|----------------------------------------------|-------------|
| Zero-point correction=                       | 0.149948    |
| (Hartree/Particle)                           |             |
| Thermal correction to Energy=                | 0.161809    |
| Thermal correction to Enthalpy=              | 0.162754    |
| Thermal correction to Gibbs Free Energy=     | 0.112453    |
| Sum of electronic and zero-point Energies=   | -814.876154 |
| Sum of electronic and thermal Energies=      | -814.864293 |
| Sum of electronic and thermal Enthalpies=    | -814.863349 |
| Sum of electronic and thermal Free Energies= | -814.913650 |

Methyl sulfenate S coordinated with MeB(EG), with K<sup>+</sup>

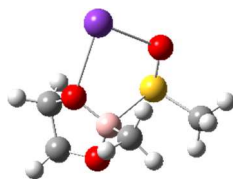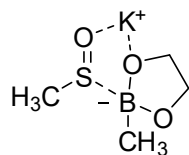

0 1

|   |             |             |             |
|---|-------------|-------------|-------------|
| C | 0.29398400  | 2.93624200  | -0.05551300 |
| H | -0.16950100 | 3.71312500  | -0.66485500 |
| H | 1.37939700  | 3.05892100  | -0.06657700 |
| H | -0.07937900 | 2.98854500  | 0.96811500  |
| S | -0.08931000 | 1.30545600  | -0.77446700 |
| B | 0.83967300  | -0.08344600 | 0.63029200  |
| C | 0.42522400  | 0.38177400  | 2.09682700  |
| H | 0.70311600  | -0.39558300 | 2.82052000  |
| H | 0.93945000  | 1.29949100  | 2.39853700  |
| H | -0.65031600 | 0.55978500  | 2.20518000  |
| O | -1.66729600 | 1.12361900  | -0.58571200 |
| O | 0.28568000  | -1.34945000 | 0.17614100  |
| O | 2.23596500  | -0.07025200 | 0.27943200  |
| C | 1.16579800  | -1.84927200 | -0.83728000 |
| H | 0.82747000  | -1.51869500 | -1.82710800 |
| H | 1.16702400  | -2.94148200 | -0.81526800 |
| C | 2.53424100  | -1.24155500 | -0.48498300 |
| H | 3.11158000  | -0.97831700 | -1.37593200 |
| H | 3.13188200  | -1.92976000 | 0.12493200  |
| K | -2.44633700 | -1.22739900 | 0.11575100  |

Zero-point correction= 0.147639  
(Hartree/Particle)  
Thermal correction to Energy= 0.160978  
Thermal correction to Enthalpy= 0.161922  
Thermal correction to Gibbs Free Energy= 0.106805  
Sum of electronic and zero-point Energies= -1407.257096  
Sum of electronic and thermal Energies= -1407.243756  
Sum of electronic and thermal Enthalpies= -1407.242812  
Sum of electronic and thermal Free Energies= -1407.297929

Optimized attempt at methyl sulfenate S coordinated with MeB(EG), with Li<sup>+</sup>

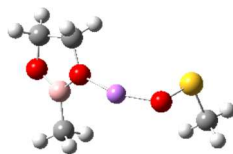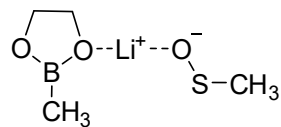

|   |             |             |             |
|---|-------------|-------------|-------------|
| 0 | 1           |             |             |
| C | -3.64189200 | 0.97205600  | -0.80803200 |
| H | -4.37840100 | 1.36305300  | -0.10157200 |
| H | -4.11850800 | 0.83120000  | -1.78255500 |
| H | -2.81780900 | 1.68268100  | -0.91070800 |
| S | -3.03495600 | -0.65977500 | -0.26332100 |
| B | 2.06881900  | 0.80184300  | 0.07564100  |
| C | 1.68011900  | 2.29615500  | 0.28282100  |
| H | 2.55757600  | 2.94527700  | 0.30962700  |

|    |             |             |             |
|----|-------------|-------------|-------------|
| H  | 1.04709700  | 2.63330300  | -0.54624800 |
| H  | 1.10479300  | 2.44510500  | 1.20057500  |
| O  | -2.36580400 | -0.34091600 | 1.20995200  |
| O  | 1.23223000  | -0.25736300 | 0.41233600  |
| O  | 3.24407200  | 0.36675800  | -0.46910800 |
| C  | 1.84532700  | -1.49552800 | -0.04936500 |
| H  | 1.26625300  | -1.86490100 | -0.89657400 |
| H  | 1.81724800  | -2.22503600 | 0.75897100  |
| C  | 3.27582100  | -1.07954300 | -0.44012900 |
| H  | 3.56705000  | -1.44856200 | -1.42292300 |
| H  | 4.01672900  | -1.39227100 | 0.29763900  |
| Li | -0.56235200 | -0.24311100 | 1.26383000  |

|                                              |             |
|----------------------------------------------|-------------|
| Zero-point correction=                       | 0.149586    |
| (Hartree/Particle)                           |             |
| Thermal correction to Energy=                | 0.163157    |
| Thermal correction to Enthalpy=              | 0.164101    |
| Thermal correction to Gibbs Free Energy=     | 0.105035    |
| Sum of electronic and zero-point Energies=   | -814.865780 |
| Sum of electronic and thermal Energies=      | -814.852210 |
| Sum of electronic and thermal Enthalpies=    | -814.851265 |
| Sum of electronic and thermal Free Energies= | -814.910331 |

Constrained (frozen S-B) methyl sulfenate S coordinated with MeB(EG), with Li<sup>+</sup>

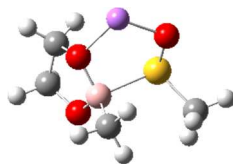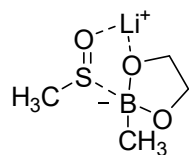

|     |             |             |             |
|-----|-------------|-------------|-------------|
| 0 1 |             |             |             |
| C   | 2.57276000  | -0.85834200 | -0.57917800 |
| H   | 3.47358200  | -0.40472800 | -0.99342900 |
| H   | 2.29616300  | -1.73251000 | -1.17297000 |
| H   | 2.73578300  | -1.14558800 | 0.45958200  |
| S   | 1.20738700  | 0.33760200  | -0.69263800 |
| B   | -0.44902700 | -0.57131500 | 0.40078300  |
| C   | 0.16804900  | -1.46853000 | 1.55973500  |
| H   | -0.64122200 | -1.80377600 | 2.22107900  |
| H   | 0.65933100  | -2.36641600 | 1.17263200  |
| H   | 0.89381000  | -0.93345100 | 2.18145800  |
| O   | 1.63203200  | 1.53016800  | 0.30279100  |
| O   | -1.12118700 | 0.65873900  | 0.82647700  |
| O   | -1.28332700 | -1.19961100 | -0.57693700 |
| C   | -2.08616800 | 0.98789500  | -0.18907500 |
| H   | -1.65040200 | 1.69996700  | -0.89953200 |

|    |             |             |             |
|----|-------------|-------------|-------------|
| H  | -2.95915800 | 1.44731500  | 0.27803700  |
| C  | -2.40316300 | -0.35769100 | -0.86331100 |
| H  | -2.53330900 | -0.25233900 | -1.94381700 |
| H  | -3.31000100 | -0.81031400 | -0.44653400 |
| Li | 0.21111500  | 2.00747200  | 1.41137400  |

|                                              |             |
|----------------------------------------------|-------------|
| Zero-point correction=                       | 0.149626    |
| (Hartree/Particle)                           |             |
| Thermal correction to Energy=                | 0.161910    |
| Thermal correction to Enthalpy=              | 0.162854    |
| Thermal correction to Gibbs Free Energy=     | 0.111814    |
| Sum of electronic and zero-point Energies=   | -814.857687 |
| Sum of electronic and thermal Energies=      | -814.845403 |
| Sum of electronic and thermal Enthalpies=    | -814.844459 |
| Sum of electronic and thermal Free Energies= | -814.895499 |

### Benzenesulfenate (1)

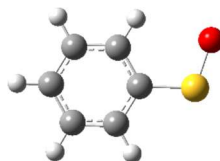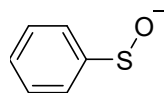

|      |             |             |             |
|------|-------------|-------------|-------------|
| -1 1 |             |             |             |
| C    | -0.30517900 | 1.10259700  | 0.00000300  |
| C    | -1.67874300 | 1.34727100  | 0.00000500  |
| C    | -2.59482900 | 0.29411500  | 0.00000100  |
| C    | -2.11323000 | -1.02254900 | -0.00000600 |
| C    | -0.74774200 | -1.27905100 | -0.00000700 |
| C    | 0.17913500  | -0.21611800 | -0.00000100 |
| H    | 0.41171400  | 1.91531600  | 0.00000500  |
| H    | -2.03557500 | 2.37297000  | 0.00000900  |
| H    | -2.81134100 | -1.85397600 | -0.00000900 |
| H    | -0.39149100 | -2.30539600 | -0.00001400 |
| S    | 1.91814100  | -0.55616900 | 0.00001200  |
| O    | 2.67014700  | 0.86534700  | -0.00001900 |
| H    | -3.66120500 | 0.48941600  | 0.00000200  |

|                                            |             |
|--------------------------------------------|-------------|
| Zero-point correction=                     | 0.092252    |
| (Hartree/Particle)                         |             |
| Thermal correction to Energy=              | 0.099145    |
| Thermal correction to Enthalpy=            | 0.100089    |
| Thermal correction to Gibbs Free Energy=   | 0.060555    |
| Sum of electronic and zero-point Energies= | -705.173031 |
| Sum of electronic and thermal Energies=    | -705.166138 |
| Sum of electronic and thermal Enthalpies=  | -705.165194 |



Sum of electronic and thermal Free Energies=

-705.204729

Ethylene glycol ester of 2-bromomethylphenyl boronic acid (reactant **2a**)

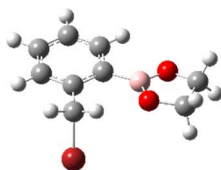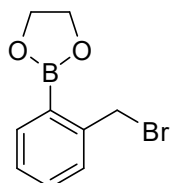

|    |   |             |             |             |
|----|---|-------------|-------------|-------------|
| 0  | 1 |             |             |             |
| C  |   | 0.65788400  | 2.45150600  | -0.37606200 |
| C  |   | 0.43465800  | 1.14576800  | 0.09570200  |
| C  |   | -0.86544300 | 0.81812900  | 0.55009600  |
| C  |   | -1.87455400 | 1.78926700  | 0.52640800  |
| C  |   | -1.62560200 | 3.07637100  | 0.05952500  |
| C  |   | -0.35198200 | 3.40969700  | -0.39790600 |
| H  |   | 1.64848500  | 2.71699900  | -0.72669500 |
| H  |   | -2.86746800 | 1.52955300  | 0.87825100  |
| H  |   | -2.42061300 | 3.81344700  | 0.05443200  |
| H  |   | -0.14648600 | 4.40881700  | -0.76498700 |
| C  |   | -1.21499000 | -0.53741500 | 1.07015600  |
| H  |   | -2.05570300 | -0.51442600 | 1.75626600  |
| H  |   | -0.37634700 | -1.07924300 | 1.48790800  |
| B  |   | 1.65684500  | 0.17396200  | 0.08624200  |
| O  |   | 2.82895800  | 0.50247600  | -0.55266700 |
| O  |   | 1.71633700  | -1.05204800 | 0.70328700  |
| C  |   | 2.98803500  | -1.66304900 | 0.37816600  |
| C  |   | 3.80406200  | -0.52706500 | -0.27015200 |
| H  |   | 3.44114800  | -2.04588400 | 1.29235900  |
| H  |   | 2.80472600  | -2.49178700 | -0.30854900 |
| H  |   | 4.55571100  | -0.11459500 | 0.40620900  |
| H  |   | 4.28442600  | -0.82711300 | -1.20134600 |
| Br |   | -1.86362500 | -1.76137900 | -0.40930300 |

Zero-point correction=

0.179299

(Hartree/Particle)

Thermal correction to Energy=

0.191138

Thermal correction to Enthalpy=

0.192082

Thermal correction to Gibbs Free Energy=

0.138264

Sum of electronic and zero-point Energies=

-3098.500935

Sum of electronic and thermal Energies=

-3098.489097

Sum of electronic and thermal Enthalpies=

-3098.488153

Sum of electronic and thermal Free Energies=

-3098.541971

Complex of **1** with **2a** - **1.2a.C**

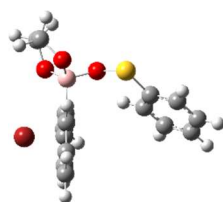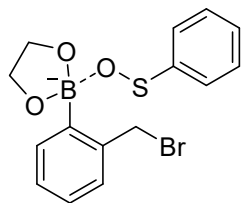

|    |   |             |             |             |
|----|---|-------------|-------------|-------------|
| -1 | 1 |             |             |             |
| C  |   | -0.50078900 | 0.84383400  | 2.43196300  |
| C  |   | -0.70694100 | 0.48814600  | 1.08708700  |
| C  |   | -0.99962300 | -0.87171500 | 0.83028100  |
| C  |   | -1.05597500 | -1.80614500 | 1.87701300  |
| C  |   | -0.84153600 | -1.42074600 | 3.19511500  |
| C  |   | -0.56551200 | -0.08087000 | 3.47323900  |
| H  |   | -0.28591200 | 1.88249600  | 2.65743000  |
| H  |   | -1.28029900 | -2.84462800 | 1.65114400  |
| H  |   | -0.88809800 | -2.15335400 | 3.99374600  |
| H  |   | -0.39795800 | 0.23892800  | 4.49704800  |
| C  |   | -1.21706600 | -1.36086000 | -0.56269200 |
| H  |   | -0.72622300 | -2.30767000 | -0.76961700 |
| H  |   | -0.99969400 | -0.61805200 | -1.31902800 |
| B  |   | -0.56062800 | 1.62798600  | -0.06983400 |
| O  |   | -0.50755200 | 2.99974600  | 0.47505700  |
| O  |   | -1.65949100 | 1.63076000  | -1.03902600 |
| C  |   | -1.84484900 | 2.98100800  | -1.44533000 |
| C  |   | -1.47322600 | 3.79497300  | -0.19912300 |
| H  |   | -1.18058800 | 3.22913200  | -2.28569600 |
| H  |   | -2.88000300 | 3.13521900  | -1.76523900 |
| H  |   | -1.05732200 | 4.77767100  | -0.44862700 |
| H  |   | -2.35287500 | 3.94927700  | 0.44393100  |
| Br |   | -3.17287700 | -1.82548400 | -0.93261300 |
| C  |   | 4.34436600  | 0.05298700  | 0.16708100  |
| C  |   | 5.08693200  | -1.11292700 | 0.00911300  |
| C  |   | 4.56607200  | -2.19604300 | -0.70516000 |
| C  |   | 3.29164800  | -2.09373600 | -1.26224200 |
| C  |   | 2.53928300  | -0.92792800 | -1.11520000 |
| C  |   | 3.06063600  | 0.15186000  | -0.39469400 |
| H  |   | 4.75840500  | 0.88437100  | 0.72910700  |
| H  |   | 6.07560700  | -1.17778800 | 0.45079700  |
| H  |   | 2.87582900  | -2.92600800 | -1.82057200 |
| H  |   | 1.55330400  | -0.84229000 | -1.55142200 |
| S  |   | 2.18492300  | 1.68534200  | -0.19631000 |
| O  |   | 0.72131100  | 1.37102100  | -0.91438800 |
| H  |   | 5.14623100  | -3.10398500 | -0.82327200 |

|                                              |              |
|----------------------------------------------|--------------|
| Zero-point correction=                       | 0.271959     |
| (Hartree/Particle)                           |              |
| Thermal correction to Energy=                | 0.291783     |
| Thermal correction to Enthalpy=              | 0.292727     |
| Thermal correction to Gibbs Free Energy=     | 0.218797     |
| Sum of electronic and zero-point Energies=   | -3803.692634 |
| Sum of electronic and thermal Energies=      | -3803.672811 |
| Sum of electronic and thermal Enthalpies=    | -3803.671867 |
| Sum of electronic and thermal Free Energies= | -3803.745797 |

Transition state for internal alkylation of **1.2a.C** – **1.2a.C.TS**

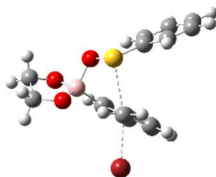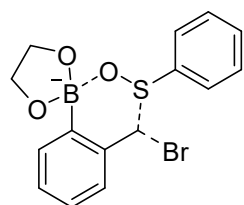

|    |             |             |             |  |
|----|-------------|-------------|-------------|--|
| -1 | 1           |             |             |  |
| C  | 0.21400700  | 0.89755200  | 2.50748700  |  |
| C  | 0.51874900  | 0.66781500  | 1.15740100  |  |
| C  | 0.52902000  | -0.68577900 | 0.71867600  |  |
| C  | 0.17468000  | -1.73274600 | 1.60044500  |  |
| C  | -0.10621800 | -1.46779600 | 2.92894500  |  |
| C  | -0.06851900 | -0.14390400 | 3.38779300  |  |
| H  | 0.19684400  | 1.92007800  | 2.86843100  |  |
| H  | 0.16736900  | -2.75333700 | 1.23312700  |  |
| H  | -0.34875800 | -2.27645700 | 3.60918700  |  |
| H  | -0.27590300 | 0.06976600  | 4.43145100  |  |
| C  | 0.86978100  | -0.99365500 | -0.64113800 |  |
| H  | 1.38068800  | -0.27059800 | -1.25049100 |  |
| H  | 0.53142400  | -1.90845000 | -1.10279000 |  |
| Br | 3.21368500  | -2.26336700 | -0.57335600 |  |
| B  | 0.61942700  | 1.90081600  | 0.12399900  |  |
| O  | 1.71530700  | 1.87525900  | -0.84537600 |  |
| O  | 0.63819300  | 3.20696100  | 0.74418900  |  |
| C  | 1.33519200  | 4.07768900  | -0.14383100 |  |
| H  | 0.63794100  | 4.53236400  | -0.86049000 |  |
| H  | 1.81869600  | 4.87668400  | 0.42510400  |  |
| C  | 2.33618400  | 3.15885900  | -0.85762600 |  |
| H  | 3.29059200  | 3.11553600  | -0.31543500 |  |
| H  | 2.53813000  | 3.47529200  | -1.88587700 |  |
| O  | -0.77260100 | 1.85115300  | -0.68394800 |  |
| S  | -1.09794100 | 0.60293100  | -1.68045700 |  |
| C  | -2.57564100 | -0.10178500 | -0.97588600 |  |

|   |             |             |             |
|---|-------------|-------------|-------------|
| C | -3.12801700 | 0.37895200  | 0.21300300  |
| C | -3.18883100 | -1.15748200 | -1.66515300 |
| C | -4.29335700 | -0.20353100 | 0.71245100  |
| H | -2.64526200 | 1.19839200  | 0.72874900  |
| C | -4.34881700 | -1.73142200 | -1.15405500 |
| H | -2.76400400 | -1.52739300 | -2.59275700 |
| C | -4.90678200 | -1.25747200 | 0.03651100  |
| H | -4.72118000 | 0.17128000  | 1.63589200  |
| H | -4.81948000 | -2.54936000 | -1.68813400 |
| H | -5.81192300 | -1.70567800 | 0.42977000  |

|                                              |              |
|----------------------------------------------|--------------|
| Zero-point correction=                       | 0.271126     |
| (Hartree/Particle)                           |              |
| Thermal correction to Energy=                | 0.290538     |
| Thermal correction to Enthalpy=              | 0.291482     |
| Thermal correction to Gibbs Free Energy=     | 0.219826     |
| Sum of electronic and zero-point Energies=   | -3803.680657 |
| Sum of electronic and thermal Energies=      | -3803.661245 |
| Sum of electronic and thermal Enthalpies=    | -3803.660301 |
| Sum of electronic and thermal Free Energies= | -3803.731957 |

Transition state for reaction of **1** and **2a** w/o precomplexation – **1.2a.TS**

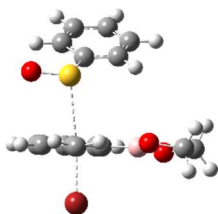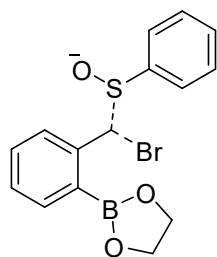

|      |             |             |             |
|------|-------------|-------------|-------------|
| -1 1 |             |             |             |
| C    | -1.25187100 | -1.06492000 | -0.56076100 |
| H    | -1.21569700 | -2.10225800 | -0.84865600 |
| H    | -1.30085600 | -0.33520000 | -1.34843700 |
| C    | -0.69077100 | -0.69812700 | 0.73178300  |
| C    | -0.39476500 | -1.73258100 | 1.63910100  |
| C    | -0.46726500 | 0.65241600  | 1.11692600  |
| C    | 0.11549000  | -1.46029500 | 2.90127500  |
| H    | -0.57414800 | -2.75919000 | 1.33999800  |
| C    | 0.04258400  | 0.89575100  | 2.40239400  |
| C    | 0.33287400  | -0.13739500 | 3.29057900  |
| H    | 0.33993700  | -2.27478200 | 3.58108200  |
| H    | 0.21663100  | 1.92098700  | 2.70862500  |
| H    | 0.72534700  | 0.08570800  | 4.27632600  |

|    |             |             |             |
|----|-------------|-------------|-------------|
| Br | -3.61356100 | -1.09183100 | -0.27343300 |
| B  | -0.74659700 | 1.89571800  | 0.22045200  |
| O  | -0.68143700 | 3.17592700  | 0.72730800  |
| O  | -1.06493200 | 1.87817600  | -1.11713700 |
| C  | -1.34577900 | 3.23251400  | -1.53702800 |
| H  | -2.42028400 | 3.32381400  | -1.71010000 |
| H  | -0.81357300 | 3.43436900  | -2.46672700 |
| C  | -0.86117900 | 4.10564200  | -0.36303600 |
| H  | -1.58753900 | 4.86397100  | -0.06983700 |
| H  | 0.09732300  | 4.58733700  | -0.56991400 |
| S  | 1.31590900  | -1.64480200 | -1.81840000 |
| O  | 1.54393900  | -3.14428700 | -1.36734600 |
| C  | 2.52218600  | -0.66493100 | -0.95601400 |
| C  | 3.43077700  | -1.26039700 | -0.07058500 |
| C  | 2.57879300  | 0.72281500  | -1.17545700 |
| C  | 4.38231200  | -0.47697000 | 0.58171000  |
| H  | 3.37727400  | -2.33117900 | 0.08644200  |
| C  | 3.53309300  | 1.49371000  | -0.52041000 |
| H  | 1.87961000  | 1.19210700  | -1.86030600 |
| C  | 4.44209300  | 0.90048100  | 0.36334400  |
| H  | 5.08300700  | -0.94688000 | 1.26455500  |
| H  | 3.56950500  | 2.56355600  | -0.69802700 |
| H  | 5.18454400  | 1.50516200  | 0.87173900  |

Zero-point correction= 0.271297  
(Hartree/Particle)  
Thermal correction to Energy= 0.291776  
Thermal correction to Enthalpy= 0.292720  
Thermal correction to Gibbs Free Energy= 0.216480  
Sum of electronic and zero-point Energies= -3803.670124  
Sum of electronic and thermal Energies= -3803.649645  
Sum of electronic and thermal Enthalpies= -3803.648700  
Sum of electronic and thermal Free Energies= -3803.724941

Sulfoxide product formed from **1** and **2a**.

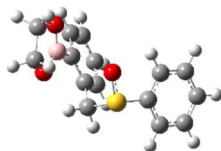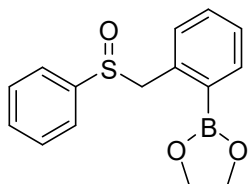

|     |             |            |             |
|-----|-------------|------------|-------------|
| 0 1 |             |            |             |
| C   | 1.49438600  | 2.41946100 | -0.42701200 |
| C   | 1.38452200  | 1.16082600 | 0.18866300  |
| C   | 0.25303700  | 0.91175900 | 1.00060300  |
| C   | -0.70875300 | 1.91552400 | 1.17622600  |

|   |             |             |             |
|---|-------------|-------------|-------------|
| C | -0.56515600 | 3.16238900  | 0.57405600  |
| C | 0.54019000  | 3.41571700  | -0.23648900 |
| H | 2.35211000  | 2.61984100  | -1.05951000 |
| H | -1.57490600 | 1.71876800  | 1.79868400  |
| H | -1.31403100 | 3.92981600  | 0.73508100  |
| H | 0.65873000  | 4.38215900  | -0.71353000 |
| C | 0.03036100  | -0.41906000 | 1.64385600  |
| H | 0.94437900  | -0.86000200 | 2.03758300  |
| H | -0.72951400 | -0.39215000 | 2.42566000  |
| B | 2.53210300  | 0.13076900  | -0.05316700 |
| O | 2.97050100  | -0.79329700 | 0.86791700  |
| O | 3.29838100  | 0.14762000  | -1.19490900 |
| C | 4.38132700  | -0.79437400 | -1.02298500 |
| H | 4.45529900  | -1.42045400 | -1.91224600 |
| H | 5.31129100  | -0.23454300 | -0.89838200 |
| C | 4.00050700  | -1.59016500 | 0.24015700  |
| H | 4.83128100  | -1.71115000 | 0.93542000  |
| H | 3.58201200  | -2.57064600 | 0.00209800  |
| O | 0.36513000  | -1.68541900 | -0.76746800 |
| S | -0.56026600 | -1.75426000 | 0.44652500  |
| C | -2.14617400 | -1.02034200 | -0.06544200 |
| C | -2.24984600 | -0.43611800 | -1.32301700 |
| C | -3.24947800 | -1.12680200 | 0.78139400  |
| C | -3.48180100 | 0.07542900  | -1.73205700 |
| H | -1.37792100 | -0.39412700 | -1.96456500 |
| C | -4.47416300 | -0.60757500 | 0.36577200  |
| H | -3.16260600 | -1.61028300 | 1.74872200  |
| C | -4.58999000 | -0.00626800 | -0.88924700 |
| H | -3.57453900 | 0.53501300  | -2.70941600 |
| H | -5.33776600 | -0.68140300 | 1.01651200  |
| H | -5.54599300 | 0.38982200  | -1.21186200 |

Zero-point correction= 0.273803  
(Hartree/Particle)  
Thermal correction to Energy= 0.291573  
Thermal correction to Enthalpy= 0.292517  
Thermal correction to Gibbs Free Energy= 0.225313  
Sum of electronic and zero-point Energies= -1229.386398  
Sum of electronic and thermal Energies= -1229.368629  
Sum of electronic and thermal Enthalpies= -1229.367684  
Sum of electronic and thermal Free Energies= -1229.434888

**BnBr (reactant – 2)**

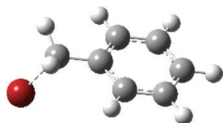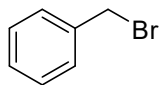

0 1

|    |             |             |             |
|----|-------------|-------------|-------------|
| C  | -2.59093500 | 1.20752200  | -0.22213900 |
| C  | -1.29840500 | 1.20714800  | 0.29682900  |
| C  | -0.63816800 | -0.00001400 | 0.56017100  |
| C  | -1.29842200 | -1.20716100 | 0.29680400  |
| C  | -2.59095200 | -1.20750500 | -0.22216500 |
| C  | -3.23945600 | 0.00001600  | -0.48437900 |
| H  | -3.09288700 | 2.14804800  | -0.41853100 |
| H  | -0.79746100 | -2.14766400 | 0.50047700  |
| H  | -3.09291700 | -2.14802000 | -0.41857700 |
| H  | -4.24585300 | 0.00002700  | -0.88725700 |
| C  | 0.73713600  | -0.00002900 | 1.13175200  |
| H  | 0.96206000  | -0.89322100 | 1.70611100  |
| H  | 0.96206200  | 0.89313400  | 1.70615600  |
| Br | 2.16050400  | 0.00000600  | -0.30943200 |
| H  | -0.79742900 | 2.14763900  | 0.50051700  |

|                                              |              |
|----------------------------------------------|--------------|
| Zero-point correction=                       | 0.118656     |
| (Hartree/Particle)                           |              |
| Thermal correction to Energy=                | 0.125768     |
| Thermal correction to Enthalpy=              | 0.126712     |
| Thermal correction to Gibbs Free Energy=     | 0.085051     |
| Sum of electronic and zero-point Energies=   | -2845.069493 |
| Sum of electronic and thermal Energies=      | -2845.062381 |
| Sum of electronic and thermal Enthalpies=    | -2845.061436 |
| Sum of electronic and thermal Free Energies= | -2845.103097 |

Transition state for reaction of **1** and **2a** – **1.2.TS**

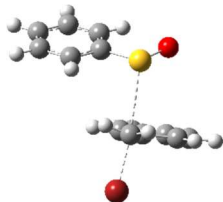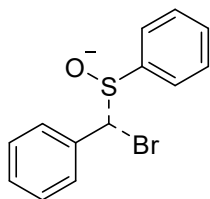

|    |            |             |             |  |
|----|------------|-------------|-------------|--|
| -1 | 1          |             |             |  |
| C  | 1.15192900 | 0.59621800  | -0.56308400 |  |
| H  | 1.40280900 | 0.72110100  | -1.60287600 |  |
| H  | 0.47085500 | 1.31757900  | -0.14273000 |  |
| C  | 1.20693700 | -0.73594500 | 0.01634300  |  |
| C  | 0.65143300 | -0.99164400 | 1.28317300  |  |
| C  | 1.83407700 | -1.79114500 | -0.66965000 |  |
| C  | 0.72433500 | -2.26079100 | 1.84556800  |  |
| H  | 0.16616000 | -0.18633900 | 1.82328300  |  |
| C  | 1.90702900 | -3.05975500 | -0.10465500 |  |
| H  | 2.26490800 | -1.60746100 | -1.64781100 |  |

|    |             |             |             |
|----|-------------|-------------|-------------|
| C  | 1.35635600  | -3.29881800 | 1.15617200  |
| H  | 0.29036100  | -2.44339300 | 2.82226900  |
| H  | 2.39178500  | -3.86407500 | -0.64651200 |
| H  | 1.41474500  | -4.28778300 | 1.59656600  |
| Br | 3.06817100  | 1.75237200  | 0.19228900  |
| S  | -1.38397400 | 0.02769900  | -1.97910500 |
| C  | -2.42101200 | 0.40628300  | -0.58369500 |
| C  | -2.53679500 | 1.73491200  | -0.13634500 |
| C  | -3.13308800 | -0.60540900 | 0.07436500  |
| C  | -3.34927100 | 2.03674900  | 0.95104200  |
| H  | -1.99767400 | 2.52905800  | -0.64447200 |
| C  | -3.94763000 | -0.29026400 | 1.16224600  |
| H  | -3.03822800 | -1.62351500 | -0.28462000 |
| C  | -4.06186800 | 1.02679000  | 1.60898400  |
| H  | -3.43160200 | 3.06528500  | 1.28676400  |
| H  | -4.49666500 | -1.08084200 | 1.66390400  |
| H  | -4.69614800 | 1.26718800  | 2.45463000  |
| O  | -1.53479100 | -1.52326100 | -2.24820300 |

Zero-point correction= 0.210771  
(Hartree/Particle)  
Thermal correction to Energy= 0.226430  
Thermal correction to Enthalpy= 0.227374  
Thermal correction to Gibbs Free Energy= 0.162793  
Sum of electronic and zero-point Energies= -3550.239116  
Sum of electronic and thermal Energies= -3550.223457  
Sum of electronic and thermal Enthalpies= -3550.222513  
Sum of electronic and thermal Free Energies= -3550.287095

Sulfoxide product formed from **1** and **2a**.

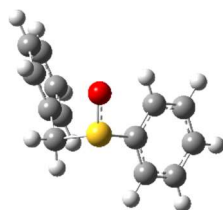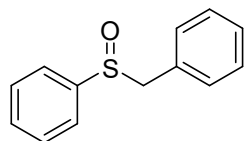

|   |            |             |             |
|---|------------|-------------|-------------|
| 0 | 1          |             |             |
| C | 0.77404300 | -1.42434000 | 1.20919500  |
| H | 0.26348400 | -1.17486100 | 2.14060000  |
| H | 1.34532100 | -2.34242400 | 1.35610900  |
| C | 1.61508700 | -0.30882800 | 0.68092000  |
| C | 2.66119200 | -0.57136400 | -0.21419100 |
| C | 1.37436000 | 1.01661500  | 1.06790400  |
| C | 3.44545400 | 0.46747600  | -0.71213100 |
| H | 2.86150800 | -1.59249100 | -0.51687000 |
| C | 2.16245100 | 2.05442000  | 0.57509900  |



|   |             |             |             |
|---|-------------|-------------|-------------|
| H | 0.57310200  | 1.23467600  | 1.76541300  |
| C | 3.19860700  | 1.78293100  | -0.31897900 |
| H | 4.25244300  | 0.24888300  | -1.40242200 |
| H | 1.96962700  | 3.07348000  | 0.89109400  |
| H | 3.81318100  | 2.59007300  | -0.70138300 |
| S | -0.60359100 | -2.00397800 | 0.05732200  |
| C | -1.55953200 | -0.45875000 | -0.06411400 |
| C | -2.41529100 | -0.10276200 | 0.97835100  |
| C | -1.47891900 | 0.29827300  | -1.22773800 |
| C | -3.18242200 | 1.05455000  | 0.85898800  |
| H | -2.49125700 | -0.71696200 | 1.86933300  |
| C | -2.25555900 | 1.45194200  | -1.33983300 |
| H | -0.82308000 | -0.02267300 | -2.02805600 |
| C | -3.10199000 | 1.83161800  | -0.29846500 |
| H | -3.84856400 | 1.34282400  | 1.66388600  |
| H | -2.19999900 | 2.05113700  | -2.24144400 |
| H | -3.70594000 | 2.72696300  | -0.39055600 |
| O | 0.02784200  | -2.23820900 | -1.31160900 |

|                                              |             |
|----------------------------------------------|-------------|
| Zero-point correction=                       | 0.213296    |
| (Hartree/Particle)                           |             |
| Thermal correction to Energy=                | 0.226375    |
| Thermal correction to Enthalpy=              | 0.227319    |
| Thermal correction to Gibbs Free Energy=     | 0.171501    |
| Sum of electronic and zero-point Energies=   | -975.954175 |
| Sum of electronic and thermal Energies=      | -975.941096 |
| Sum of electronic and thermal Enthalpies=    | -975.940152 |
| Sum of electronic and thermal Free Energies= | -975.995970 |

## 2-Isopropylbenzyl bromide (reactant – 2iP)

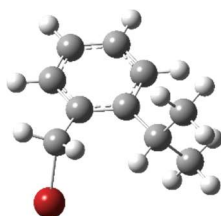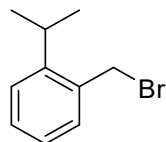

|     |             |             |             |
|-----|-------------|-------------|-------------|
| 0 1 |             |             |             |
| C   | 2.41681100  | 0.32225800  | -0.45315700 |
| C   | 1.20831300  | -0.15893600 | 0.06783400  |
| C   | 0.25207600  | 0.78573000  | 0.50063900  |
| C   | 0.52549500  | 2.15772000  | 0.38010800  |
| C   | 1.72757200  | 2.61275500  | -0.14722700 |
| C   | 2.68093500  | 1.68462700  | -0.56400100 |
| H   | 3.17121300  | -0.38382000 | -0.78153100 |
| H   | -0.21974300 | 2.87305400  | 0.71216700  |

|    |             |             |             |
|----|-------------|-------------|-------------|
| H  | 1.92036200  | 3.67625400  | -0.22789300 |
| H  | 3.62727700  | 2.01920000  | -0.97423900 |
| C  | -1.04658200 | 0.39474100  | 1.12093200  |
| H  | -1.48848100 | 1.20488400  | 1.69165600  |
| H  | -1.00943000 | -0.50736000 | 1.72112700  |
| Br | -2.47609600 | -0.02404400 | -0.25893400 |
| C  | 0.98200800  | -1.66435900 | 0.16264600  |
| H  | -0.04965400 | -1.83877200 | 0.47315000  |
| C  | 1.15059500  | -2.36310500 | -1.19954700 |
| H  | 0.90602000  | -3.42517300 | -1.10811900 |
| H  | 0.48911500  | -1.92627000 | -1.95195900 |
| H  | 2.17746700  | -2.29032900 | -1.56809200 |
| C  | 1.89581300  | -2.29944900 | 1.22894700  |
| H  | 2.95105100  | -2.18422700 | 0.96457400  |
| H  | 1.74275100  | -1.83842400 | 2.20843400  |
| H  | 1.68721000  | -3.36935700 | 1.32036100  |

|                                              |              |
|----------------------------------------------|--------------|
| Zero-point correction=                       | 0.202654     |
| (Hartree/Particle)                           |              |
| Thermal correction to Energy=                | 0.214062     |
| Thermal correction to Enthalpy=              | 0.215006     |
| Thermal correction to Gibbs Free Energy=     | 0.163473     |
| Sum of electronic and zero-point Energies=   | -2962.957185 |
| Sum of electronic and thermal Energies=      | -2962.945778 |
| Sum of electronic and thermal Enthalpies=    | -2962.944833 |
| Sum of electronic and thermal Free Energies= | -2962.996366 |

One transition state for reaction of **1** and **2iP** – **1.2iP.TSa**

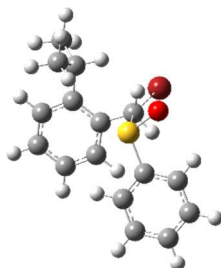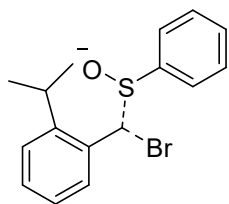

|      |             |             |             |
|------|-------------|-------------|-------------|
| -1 1 |             |             |             |
| C    | 0.45692200  | -0.82339300 | 0.05618200  |
| H    | 0.68882100  | -1.07920800 | 1.07347400  |
| H    | -0.46500600 | -1.22735400 | -0.32801500 |
| C    | 0.98029600  | 0.38531400  | -0.56450300 |
| C    | 0.37648700  | 0.81421900  | -1.76440700 |
| C    | 2.05694300  | 1.13379200  | -0.02344400 |
| C    | 0.79440000  | 1.96402500  | -2.41701100 |

|    |             |             |             |
|----|-------------|-------------|-------------|
| H  | -0.43544500 | 0.22556400  | -2.17662200 |
| C  | 2.45393600  | 2.29424200  | -0.69641200 |
| C  | 1.84008500  | 2.71311600  | -1.87520600 |
| H  | 0.31190800  | 2.27587100  | -3.33632500 |
| H  | 3.26705900  | 2.88799500  | -0.29391200 |
| H  | 2.17962800  | 3.61685400  | -2.36917400 |
| Br | 1.76065100  | -2.62931000 | -0.81508200 |
| S  | -1.51203800 | 0.38738600  | 1.77889100  |
| C  | -2.87810800 | 0.28954000  | 0.64088700  |
| C  | -3.03695000 | 1.27877600  | -0.34570500 |
| C  | -3.80189200 | -0.76158800 | 0.71860100  |
| C  | -4.10208500 | 1.20821500  | -1.23768900 |
| H  | -2.33183300 | 2.10140600  | -0.40786200 |
| C  | -4.86678900 | -0.82054200 | -0.17997500 |
| H  | -3.66949500 | -1.51353600 | 1.48780100  |
| C  | -5.02497400 | 0.15881700  | -1.16217300 |
| H  | -4.21670000 | 1.97742600  | -1.99439700 |
| H  | -5.57814000 | -1.63740300 | -0.11138200 |
| H  | -5.85526400 | 0.10972700  | -1.85749300 |
| O  | -1.68673200 | -0.81000000 | 2.79961700  |
| C  | 2.77537600  | 0.73217800  | 1.25913600  |
| H  | 2.42204200  | -0.25630600 | 1.55534300  |
| C  | 4.29762000  | 0.60879200  | 1.05896800  |
| H  | 4.75500700  | 1.57205400  | 0.81613100  |
| H  | 4.76646300  | 0.24209400  | 1.97673600  |
| H  | 4.53409900  | -0.09187800 | 0.25424200  |
| C  | 2.44478100  | 1.70217700  | 2.41073500  |
| H  | 2.92302900  | 1.36948600  | 3.33683700  |
| H  | 2.80377700  | 2.71223700  | 2.19078200  |
| H  | 1.36742100  | 1.75657100  | 2.58461100  |

Zero-point correction= 0.294612  
 (Hartree/Particle)  
 Thermal correction to Energy= 0.314759  
 Thermal correction to Enthalpy= 0.315703  
 Thermal correction to Gibbs Free Energy= 0.240125  
 Sum of electronic and zero-point Energies= -3668.126670  
 Sum of electronic and thermal Energies= -3668.106523  
 Sum of electronic and thermal Enthalpies= -3668.105578  
 Sum of electronic and thermal Free Energies= -3668.181157

Sulfoxide product formed from first T.S. of **1** and **2iP**.

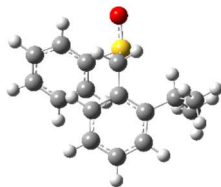

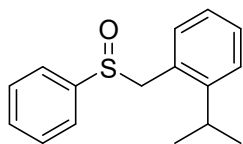

| 0 | 1 |             |             |             |
|---|---|-------------|-------------|-------------|
| C |   | -0.28034800 | -0.91753700 | 1.27381400  |
| H |   | -0.97038600 | -1.70975100 | 1.56489500  |
| H |   | 0.42941500  | -0.75554400 | 2.08517600  |
| C |   | -0.96428200 | 0.35243800  | 0.85704600  |
| C |   | -0.39486700 | 1.56711400  | 1.27084200  |
| C |   | -2.14715100 | 0.36654500  | 0.08591000  |
| C |   | -0.97367600 | 2.78845600  | 0.94731300  |
| H |   | 0.51240400  | 1.54608200  | 1.86473100  |
| C |   | -2.71469800 | 1.60935100  | -0.22841400 |
| C |   | -2.14392300 | 2.80756100  | 0.19029500  |
| H |   | -0.51895100 | 3.71294400  | 1.28419900  |
| H |   | -3.62759500 | 1.64226500  | -0.81255200 |
| H |   | -2.61228500 | 3.74992800  | -0.07130900 |
| S |   | 0.72515400  | -1.75599300 | -0.07714600 |
| C |   | 2.04190800  | -0.51380500 | -0.26475700 |
| C |   | 1.92281000  | 0.45423600  | -1.26030300 |
| C |   | 3.17352500  | -0.58884000 | 0.54359100  |
| C |   | 2.94927800  | 1.38388100  | -1.42787100 |
| H |   | 1.04759400  | 0.48335000  | -1.89924800 |
| C |   | 4.19475600  | 0.34277200  | 0.36637400  |
| H |   | 3.25316800  | -1.37437200 | 1.28592800  |
| C |   | 4.08158400  | 1.32930700  | -0.61521800 |
| H |   | 2.86669800  | 2.14227100  | -2.19770000 |
| H |   | 5.08031700  | 0.29490600  | 0.98968900  |
| H |   | 4.88050600  | 2.04882500  | -0.75286500 |
| O |   | 1.35341900  | -2.96622900 | 0.61581800  |
| C |   | -2.84079600 | -0.90735600 | -0.38838800 |
| H |   | -2.21626800 | -1.76219300 | -0.12252600 |
| C |   | -4.19485900 | -1.10260500 | 0.32146500  |
| H |   | -4.89124000 | -0.29576000 | 0.07552300  |
| H |   | -4.65282600 | -2.04696100 | 0.01340300  |
| H |   | -4.07327500 | -1.12228600 | 1.40777400  |
| C |   | -3.00653700 | -0.94539200 | -1.91901100 |
| H |   | -3.44558000 | -1.89903400 | -2.22563300 |
| H |   | -3.66489600 | -0.14778200 | -2.27406500 |
| H |   | -2.04297200 | -0.83793500 | -2.42376300 |

Zero-point correction= 0.297310  
 (Hartree/Particle)  
 Thermal correction to Energy= 0.314747  
 Thermal correction to Enthalpy= 0.315692  
 Thermal correction to Gibbs Free Energy= 0.249809  
 Sum of electronic and zero-point Energies= -1093.841983  
 Sum of electronic and thermal Energies= -1093.824546  
 Sum of electronic and thermal Enthalpies= -1093.823601  
 Sum of electronic and thermal Free Energies= -1093.889484

Other transition state for reaction of **1** and **2iP** – **1.2iP.TSb**

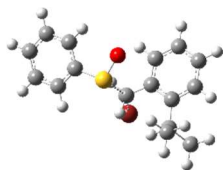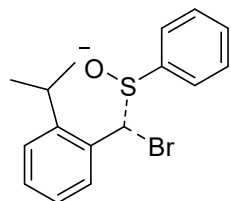

|    |   |             |             |             |
|----|---|-------------|-------------|-------------|
| -1 | 1 |             |             |             |
| C  |   | -0.28840500 | 0.64555700  | 0.01349300  |
| H  |   | -0.28396100 | 0.78827700  | 1.07883100  |
| H  |   | 0.64866500  | 0.82547500  | -0.48636000 |
| C  |   | -1.23056400 | -0.26411600 | -0.61757000 |
| C  |   | -0.94608600 | -0.68760800 | -1.93180900 |
| C  |   | -2.40704900 | -0.73165500 | 0.02339500  |
| C  |   | -1.78172000 | -1.56270900 | -2.60918000 |
| H  |   | -0.04815300 | -0.31764900 | -2.41456300 |
| C  |   | -3.22737300 | -1.62147400 | -0.67719200 |
| C  |   | -2.93082900 | -2.03551000 | -1.97466900 |
| H  |   | -1.53980700 | -1.87779100 | -3.61772300 |
| H  |   | -4.12522000 | -2.00130600 | -0.20275100 |
| H  |   | -3.59450000 | -2.72392900 | -2.48614800 |
| Br |   | -1.08637900 | 2.85856100  | -0.38669100 |
| S  |   | 1.47018200  | -1.51986400 | 1.01321200  |
| C  |   | 2.94147000  | -0.65241500 | 0.50761800  |
| C  |   | 3.31116200  | 0.53763300  | 1.15966000  |
| C  |   | 3.74240700  | -1.14442500 | -0.53181200 |
| C  |   | 4.45985200  | 1.21841300  | 0.77107900  |
| H  |   | 2.70123700  | 0.92563300  | 1.96997900  |
| C  |   | 4.89298300  | -0.45356800 | -0.91231600 |
| H  |   | 3.44774600  | -2.06448000 | -1.02283700 |
| C  |   | 5.26031100  | 0.72857700  | -0.26778500 |
| H  |   | 4.73493400  | 2.13576300  | 1.28110200  |
| H  |   | 5.50708200  | -0.84343800 | -1.71790700 |
| H  |   | 6.15542700  | 1.26209900  | -0.56660700 |
| O  |   | 1.37470700  | -2.81254600 | 0.10616400  |
| C  |   | -2.78733300 | -0.31725900 | 1.43995000  |
| C  |   | -4.23115000 | 0.21046600  | 1.53108300  |
| H  |   | -4.96525200 | -0.56943100 | 1.31083600  |
| H  |   | -4.43137000 | 0.57540900  | 2.54268800  |
| H  |   | -4.39409900 | 1.03667100  | 0.83438700  |
| C  |   | -2.55585300 | -1.47105400 | 2.43607100  |
| H  |   | -2.77823300 | -1.14344700 | 3.45618700  |
| H  |   | -3.20276400 | -2.32337100 | 2.20712500  |
| H  |   | -1.51986300 | -1.81727600 | 2.40740400  |

|                                              |             |            |              |
|----------------------------------------------|-------------|------------|--------------|
| H                                            | -2.14008300 | 0.50822000 | 1.73973800   |
| Zero-point correction=                       |             |            | 0.294661     |
| (Hartree/Particle)                           |             |            |              |
| Thermal correction to Energy=                |             |            | 0.314780     |
| Thermal correction to Enthalpy=              |             |            | 0.315724     |
| Thermal correction to Gibbs Free Energy=     |             |            | 0.240450     |
| Sum of electronic and zero-point Energies=   |             |            | -3668.126678 |
| Sum of electronic and thermal Energies=      |             |            | -3668.106559 |
| Sum of electronic and thermal Enthalpies=    |             |            | -3668.105615 |
| Sum of electronic and thermal Free Energies= |             |            | -3668.180889 |

Sulfoxide product formed from second T.S. of **1** and **2iP**.

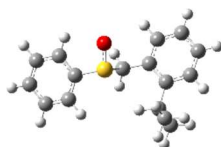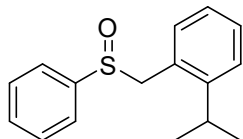

|     |             |             |             |
|-----|-------------|-------------|-------------|
| 0 1 |             |             |             |
| C   | 0.05394400  | 0.39940300  | -0.69964300 |
| H   | -0.16008500 | -0.56162200 | -1.16660100 |
| H   | -0.43768400 | 1.18928100  | -1.26866100 |
| C   | 1.51871900  | 0.68011200  | -0.52091100 |
| C   | 1.95422900  | 2.00034100  | -0.71548400 |
| C   | 2.45500600  | -0.31565000 | -0.16573800 |
| C   | 3.29196800  | 2.35184400  | -0.57683800 |
| H   | 1.22691700  | 2.75768200  | -0.98641700 |
| C   | 3.79960000  | 0.05930600  | -0.03844300 |
| C   | 4.22151600  | 1.37078400  | -0.23696100 |
| H   | 3.60460600  | 3.37757800  | -0.73512700 |
| H   | 4.53657400  | -0.69163200 | 0.22370000  |
| H   | 5.27033900  | 1.62351200  | -0.12773300 |
| S   | -0.85412300 | 0.36979200  | 0.94662400  |
| C   | -2.51516300 | 0.03971300  | 0.27003800  |
| C   | -2.88809100 | -1.27309000 | -0.01751700 |
| C   | -3.39929400 | 1.10016400  | 0.09865900  |
| C   | -4.16760700 | -1.51974300 | -0.51306300 |
| H   | -2.20002500 | -2.09530800 | 0.14734400  |
| C   | -4.67819400 | 0.84193300  | -0.39481800 |
| H   | -3.08579800 | 2.10444400  | 0.35853400  |
| C   | -5.06077000 | -0.46384800 | -0.70280900 |
| H   | -4.46848700 | -2.53563700 | -0.74138600 |
| H   | -5.37562700 | 1.66008400  | -0.53355200 |
| H   | -6.05666300 | -0.66068000 | -1.08262100 |
| O   | -0.86169400 | 1.81097300  | 1.45059100  |
| C   | 2.06764500  | -1.77420500 | 0.06142900  |

|   |            |             |             |
|---|------------|-------------|-------------|
| C | 2.64902400 | -2.68546300 | -1.03709500 |
| H | 3.74267500 | -2.67752800 | -1.02044500 |
| H | 2.31879500 | -3.71784000 | -0.88938200 |
| H | 2.32592100 | -2.36394900 | -2.03088200 |
| C | 2.46930600 | -2.26987500 | 1.46328300  |
| H | 2.11487700 | -3.29329900 | 1.61621800  |
| H | 3.55482100 | -2.27187900 | 1.59450500  |
| H | 2.03625100 | -1.64017000 | 2.24469500  |
| H | 0.98107500 | -1.85784600 | 0.00257100  |

|                                              |              |
|----------------------------------------------|--------------|
| Zero-point correction=                       | 0.297409     |
| (Hartree/Particle)                           |              |
| Thermal correction to Energy=                | 0.314806     |
| Thermal correction to Enthalpy=              | 0.315751     |
| Thermal correction to Gibbs Free Energy=     | 0.250214     |
| Sum of electronic and zero-point Energies=   | -1093.842055 |
| Sum of electronic and thermal Energies=      | -1093.824658 |
| Sum of electronic and thermal Enthalpies=    | -1093.823713 |
| Sum of electronic and thermal Free Energies= | -1093.889250 |

2-Bromomethylphenyl dimethyl borane (reactant – **2b**)

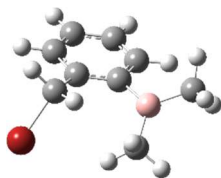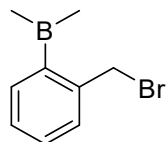

|     |             |             |             |
|-----|-------------|-------------|-------------|
| 0 1 |             |             |             |
| C   | 2.50384600  | 0.67166300  | -0.41513600 |
| C   | 1.40554500  | -0.08331600 | 0.04838600  |
| C   | 0.26217200  | 0.63874300  | 0.47415100  |
| C   | 0.25567100  | 2.03999100  | 0.42782300  |
| C   | 1.34145200  | 2.75085500  | -0.06958100 |
| C   | 2.47292500  | 2.05993500  | -0.50207700 |
| H   | 3.40452000  | 0.15427600  | -0.72657900 |
| H   | -0.61809800 | 2.57711500  | 0.78243000  |
| H   | 1.31068900  | 3.83387800  | -0.10666600 |
| H   | 3.33115400  | 2.60042600  | -0.88550000 |
| C   | -0.93758000 | -0.03406100 | 1.06083500  |
| H   | -1.34471600 | 0.51008500  | 1.90786800  |
| H   | -0.78598400 | -1.07389900 | 1.32187800  |
| B   | 1.56337800  | -1.65448400 | 0.01751900  |
| Br  | -2.50281200 | -0.08039300 | -0.22408100 |
| C   | 2.97047900  | -2.29158000 | 0.34048100  |
| H   | 2.87614600  | -3.28851800 | 0.78332900  |
| H   | 3.49821900  | -2.44423000 | -0.61376800 |

|   |             |             |             |
|---|-------------|-------------|-------------|
| H | 3.62342100  | -1.68250100 | 0.97046900  |
| C | 0.40710600  | -2.63847700 | -0.40250900 |
| H | 0.06269100  | -3.18338500 | 0.48950100  |
| H | -0.46649900 | -2.18440400 | -0.87228100 |
| H | 0.80029100  | -3.41517700 | -1.06968200 |

|                                              |              |
|----------------------------------------------|--------------|
| Zero-point correction=                       | 0.185630     |
| (Hartree/Particle)                           |              |
| Thermal correction to Energy=                | 0.197778     |
| Thermal correction to Enthalpy=              | 0.198722     |
| Thermal correction to Gibbs Free Energy=     | 0.145746     |
| Sum of electronic and zero-point Energies=   | -2949.123874 |
| Sum of electronic and thermal Energies=      | -2949.111726 |
| Sum of electronic and thermal Enthalpies=    | -2949.110782 |
| Sum of electronic and thermal Free Energies= | -2949.163758 |

Complex of 1 with 2b - 1.2b.C

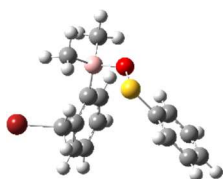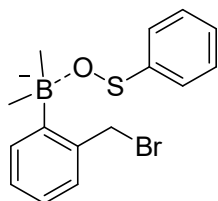

|      |             |             |             |
|------|-------------|-------------|-------------|
| -1 1 |             |             |             |
| C    | -0.18659700 | 0.16713300  | -2.52380100 |
| C    | -0.61152500 | 0.40552000  | -1.19691800 |
| C    | -1.06486400 | -0.75116100 | -0.50540900 |
| C    | -1.06602600 | -2.02014700 | -1.11777100 |
| C    | -0.64457800 | -2.19869700 | -2.42651200 |
| C    | -0.20202500 | -1.08261400 | -3.13724900 |
| H    | 0.17577900  | 1.00368300  | -3.10826700 |
| H    | -1.41204000 | -2.87703000 | -0.54648700 |
| H    | -0.65564500 | -3.18353000 | -2.88101800 |
| H    | 0.13573300  | -1.18686900 | -4.16400100 |
| C    | -1.52347100 | -0.72823400 | 0.91179900  |
| H    | -1.25188500 | 0.15881000  | 1.46114800  |
| H    | -1.25197100 | -1.62625800 | 1.45862800  |
| Br   | -3.57443900 | -0.77008800 | 1.08121300  |
| B    | -0.47201700 | 1.96923700  | -0.62500500 |
| O    | 0.97710400  | 2.14842700  | -0.00971600 |
| S    | 1.39975400  | 1.40389300  | 1.40352600  |
| C    | 2.65905900  | 0.24813000  | 0.91008400  |
| C    | 3.08148200  | 0.11985200  | -0.41715300 |
| C    | 3.26407600  | -0.53369200 | 1.90791900  |
| C    | 4.09148500  | -0.78696000 | -0.73958000 |



|   |             |             |             |
|---|-------------|-------------|-------------|
| H | 2.60850600  | 0.72485100  | -1.17922100 |
| C | 4.27118200  | -1.43398900 | 1.57379100  |
| H | 2.94652600  | -0.43889600 | 2.94182600  |
| C | 4.69249400  | -1.56823100 | 0.24755200  |
| H | 4.40902600  | -0.88149300 | -1.77287600 |
| H | 4.72833200  | -2.03456300 | 2.35306600  |
| H | 5.47670400  | -2.27107100 | -0.00945000 |
| C | -0.44312200 | 3.06024100  | -1.84801900 |
| H | -1.35998200 | 3.01868100  | -2.45237300 |
| H | -0.37963800 | 4.07633400  | -1.43810300 |
| H | 0.40183600  | 2.94922400  | -2.53907700 |
| C | -1.59559200 | 2.46532700  | 0.46120600  |
| H | -1.53259700 | 3.55607600  | 0.57630400  |
| H | -2.61836900 | 2.24202700  | 0.13169200  |
| H | -1.49963700 | 2.05234200  | 1.47246000  |

|                                              |              |
|----------------------------------------------|--------------|
| Zero-point correction=                       | 0.280497     |
| (Hartree/Particle)                           |              |
| Thermal correction to Energy=                | 0.300153     |
| Thermal correction to Enthalpy=              | 0.301097     |
| Thermal correction to Gibbs Free Energy=     | 0.229124     |
| Sum of electronic and zero-point Energies=   | -3654.325069 |
| Sum of electronic and thermal Energies=      | -3654.305413 |
| Sum of electronic and thermal Enthalpies=    | -3654.304469 |
| Sum of electronic and thermal Free Energies= | -3654.376443 |

Transition state for internal alkylation of **1.2b.C** – **1.2b.C.TS**

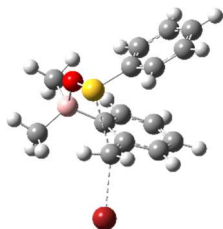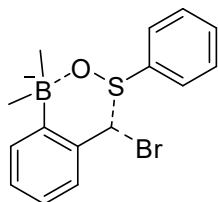

|    |             |             |            |
|----|-------------|-------------|------------|
| -1 | 1           |             |            |
| C  | 0.10203000  | 1.67306800  | 2.08531100 |
| C  | 0.43622900  | 1.23666200  | 0.78846300 |
| C  | 0.76757700  | -0.14830200 | 0.67746700 |
| C  | 0.65958300  | -1.01997500 | 1.78701300 |
| C  | 0.32779200  | -0.54010500 | 3.04017600 |
| C  | 0.07084400  | 0.82752400  | 3.19109600 |
| H  | -0.15181600 | 2.71572900  | 2.23539300 |
| H  | 0.88726900  | -2.07207400 | 1.65077900 |
| H  | 0.27470400  | -1.21037000 | 3.89077400 |

|    |             |             |             |
|----|-------------|-------------|-------------|
| H  | -0.17495400 | 1.22690400  | 4.17012800  |
| C  | 1.20713900  | -0.72359900 | -0.56658700 |
| H  | 1.50374600  | -0.11167400 | -1.39319500 |
| H  | 1.05793500  | -1.77449600 | -0.76159000 |
| Br | 3.69416000  | -1.30176900 | -0.29980700 |
| B  | 0.27254300  | 2.25463000  | -0.48725800 |
| O  | -0.89929200 | 1.65138900  | -1.43464800 |
| S  | -1.04788700 | 0.10912300  | -1.92492000 |
| C  | -2.38870000 | -0.52737900 | -0.93807000 |
| C  | -3.02125700 | 0.25075400  | 0.03404400  |
| C  | -2.81698800 | -1.84111600 | -1.17792000 |
| C  | -4.07801800 | -0.29006100 | 0.76728500  |
| H  | -2.68207400 | 1.26430000  | 0.20260500  |
| C  | -3.87111200 | -2.36897700 | -0.43875000 |
| H  | -2.33007900 | -2.44629100 | -1.93604000 |
| C  | -4.50715000 | -1.59678900 | 0.53755800  |
| H  | -4.56674400 | 0.31647400  | 1.52215500  |
| H  | -4.19765500 | -3.38601900 | -0.62606800 |
| H  | -5.32875700 | -2.01132100 | 1.11029900  |
| C  | 1.61587700  | 2.51074000  | -1.38204800 |
| H  | 2.38359300  | 3.01102200  | -0.77587100 |
| H  | 2.10335500  | 1.63313000  | -1.82009300 |
| H  | 1.38468000  | 3.18775600  | -2.21544600 |
| C  | -0.37984200 | 3.69193000  | -0.08256500 |
| H  | 0.30060300  | 4.28763700  | 0.54078500  |
| H  | -0.57600700 | 4.28432400  | -0.98500600 |
| H  | -1.32959600 | 3.61039400  | 0.46099400  |

|                                              |              |
|----------------------------------------------|--------------|
| Zero-point correction=                       | 0.279321     |
| (Hartree/Particle)                           |              |
| Thermal correction to Energy=                | 0.298714     |
| Thermal correction to Enthalpy=              | 0.299658     |
| Thermal correction to Gibbs Free Energy=     | 0.229139     |
| Sum of electronic and zero-point Energies=   | -3654.316877 |
| Sum of electronic and thermal Energies=      | -3654.297484 |
| Sum of electronic and thermal Enthalpies=    | -3654.296540 |
| Sum of electronic and thermal Free Energies= | -3654.367059 |

Transition state for reaction of **1** and **2b** w/o precomplexation – **1.2b.TS**

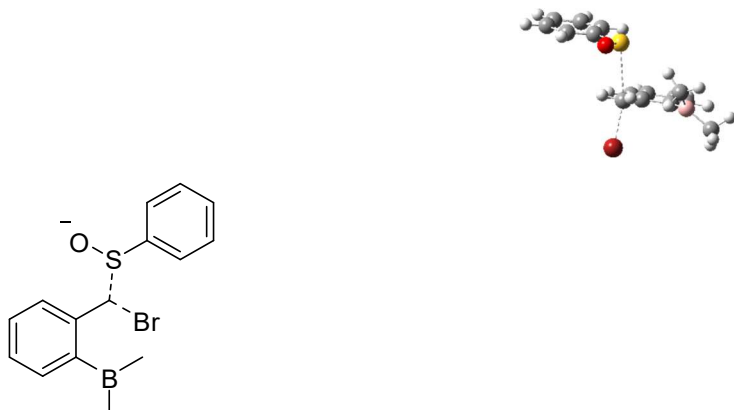

|      |             |             |             |
|------|-------------|-------------|-------------|
| -1 1 |             |             |             |
| C    | -0.54857200 | -0.76076600 | 0.15786200  |
| H    | 0.35180100  | -1.10175900 | 0.64114400  |
| H    | -0.86351700 | -1.32129000 | -0.70227100 |
| C    | -0.93567500 | 0.63364200  | 0.32629500  |
| C    | -0.21757100 | 1.39625500  | 1.26597400  |
| C    | -2.03530900 | 1.21728400  | -0.36726000 |
| C    | -0.52314000 | 2.73070500  | 1.49955900  |
| H    | 0.59507100  | 0.92789000  | 1.80981600  |
| C    | -2.33533000 | 2.56091800  | -0.08016100 |
| C    | -1.58566900 | 3.32191800  | 0.81629800  |
| H    | 0.05610200  | 3.30305600  | 2.21552000  |
| H    | -3.17707600 | 3.03130500  | -0.57726400 |
| H    | -1.84095500 | 4.36088600  | 0.99355000  |
| Br   | -1.97258900 | -2.00608400 | 1.61720500  |
| B    | -2.94174700 | 0.49851500  | -1.43819800 |
| S    | 1.52707500  | -0.40652400 | -1.82046200 |
| O    | 1.67961300  | -1.92800500 | -2.22434500 |
| C    | 2.86481300  | -0.04108100 | -0.70354100 |
| C    | 3.74501300  | -1.04906000 | -0.28666300 |
| C    | 3.04816600  | 1.27339600  | -0.23975900 |
| C    | 4.78993500  | -0.74403300 | 0.58476700  |
| H    | 3.59588200  | -2.05589600 | -0.65894300 |
| C    | 4.09331800  | 1.56518800  | 0.63097200  |
| H    | 2.37837100  | 2.06237200  | -0.56577000 |
| C    | 4.97168500  | 0.55975200  | 1.04996000  |
| H    | 5.46752900  | -1.53051400 | 0.90136200  |
| H    | 4.22728400  | 2.58305600  | 0.98222000  |
| H    | 5.78664300  | 0.79249400  | 1.72593400  |
| C    | -4.49054700 | 0.80573500  | -1.46177500 |
| H    | -4.66499600 | 1.59613700  | -2.20839600 |
| H    | -5.06999100 | -0.05609900 | -1.80947100 |
| H    | -4.90974900 | 1.15862600  | -0.51644000 |
| C    | -2.37980700 | -0.45600500 | -2.55888300 |
| H    | -1.30665900 | -0.38846000 | -2.74565500 |
| H    | -2.60028600 | -1.49558100 | -2.27285100 |
| H    | -2.91405900 | -0.30050000 | -3.50336900 |

|                                              |              |
|----------------------------------------------|--------------|
| Zero-point correction=                       | 0.277632     |
| (Hartree/Particle)                           |              |
| Thermal correction to Energy=                | 0.298481     |
| Thermal correction to Enthalpy=              | 0.299426     |
| Thermal correction to Gibbs Free Energy=     | 0.222713     |
| Sum of electronic and zero-point Energies=   | -3654.294129 |
| Sum of electronic and thermal Energies=      | -3654.273280 |
| Sum of electronic and thermal Enthalpies=    | -3654.272335 |
| Sum of electronic and thermal Free Energies= | -3654.349048 |

Sulfoxide product formed from **1** and **2b**.

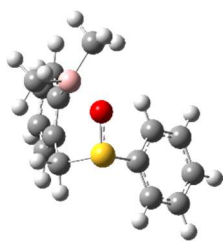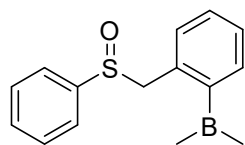

| 0 | 1 |             |             |             |
|---|---|-------------|-------------|-------------|
| C |   | -2.22405500 | 1.51058700  | 0.85944400  |
| C |   | -1.71648700 | 0.43826000  | 0.10547000  |
| C |   | -0.95213200 | 0.77920000  | -1.03319700 |
| C |   | -0.69127200 | 2.11354300  | -1.36994500 |
| C |   | -1.22736400 | 3.14912200  | -0.60993300 |
| C |   | -2.00304700 | 2.84195500  | 0.50814200  |
| H |   | -2.81073200 | 1.29903200  | 1.74744100  |
| H |   | -0.07993000 | 2.34079700  | -2.23790800 |
| H |   | -1.03820200 | 4.18099200  | -0.88410200 |
| H |   | -2.42596000 | 3.63933700  | 1.11058400  |
| C |   | -0.39126900 | -0.30482300 | -1.90307100 |
| H |   | -1.15415900 | -0.88560900 | -2.42535900 |
| H |   | 0.33701600  | 0.05135000  | -2.63279500 |
| B |   | -1.99688800 | -1.09831900 | 0.52983300  |
| O |   | -0.55647600 | -1.94965000 | 0.21823600  |
| S |   | 0.47853500  | -1.61120500 | -0.91305800 |
| C |   | 1.79178700  | -0.65132900 | -0.12050400 |
| C |   | 1.63364700  | -0.15266200 | 1.16872100  |
| C |   | 2.98289600  | -0.49267100 | -0.82992900 |
| C |   | 2.69044000  | 0.54758300  | 1.74956000  |
| H |   | 0.70953100  | -0.31774500 | 1.70589900  |
| C |   | 4.02639500  | 0.21799900  | -0.24072200 |
| H |   | 3.10277200  | -0.91626600 | -1.82115900 |
| C |   | 3.87959100  | 0.73763800  | 1.04619100  |
| H |   | 2.58200600  | 0.94263500  | 2.75275900  |
| H |   | 4.95521100  | 0.35332300  | -0.78195400 |
| H |   | 4.69702600  | 1.28208000  | 1.50430400  |
| C |   | -3.12321300 | -1.83609600 | -0.37449400 |
| H |   | -2.98834300 | -1.73240600 | -1.45793900 |
| H |   | -3.17398000 | -2.90965300 | -0.15372100 |
| H |   | -4.11142500 | -1.41611500 | -0.14483400 |
| C |   | -2.18707700 | -1.35759800 | 2.11146200  |
| H |   | -3.15419100 | -0.96947500 | 2.45612300  |
| H |   | -2.18428200 | -2.43034600 | 2.33930100  |
| H |   | -1.41570300 | -0.88807800 | 2.73408300  |

Zero-point correction= 0.281442  
 (Hartree/Particle)  
 Thermal correction to Energy= 0.298426

|                                              |              |
|----------------------------------------------|--------------|
| Thermal correction to Enthalpy=              | 0.299370     |
| Thermal correction to Gibbs Free Energy=     | 0.237073     |
| Sum of electronic and zero-point Energies=   | -1080.020291 |
| Sum of electronic and thermal Energies=      | -1080.003307 |
| Sum of electronic and thermal Enthalpies=    | -1080.002362 |
| Sum of electronic and thermal Free Energies= | -1080.064659 |

2-bromomethylphenyl difluoro borane (reactant – 2c)

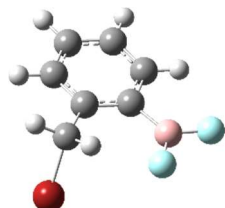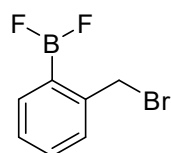

|    |             |             |             |  |
|----|-------------|-------------|-------------|--|
| 0  | 1           |             |             |  |
| C  | 2.54669600  | 0.09457300  | -0.39026300 |  |
| C  | 1.29419900  | -0.32164200 | 0.09827000  |  |
| C  | 0.38039700  | 0.66850200  | 0.54022100  |  |
| C  | 0.75053500  | 2.01581000  | 0.48253100  |  |
| C  | 1.99719400  | 2.40242200  | -0.00341900 |  |
| C  | 2.90104900  | 1.43866300  | -0.44468100 |  |
| H  | 3.25387000  | -0.65336700 | -0.72873800 |  |
| H  | 0.05164400  | 2.77189400  | 0.82308100  |  |
| H  | 2.26035000  | 3.45351600  | -0.03459300 |  |
| H  | 3.87284700  | 1.73101500  | -0.82443400 |  |
| C  | -0.97423000 | 0.34452300  | 1.08426500  |  |
| H  | -1.35528500 | 1.13490700  | 1.72274600  |  |
| H  | -1.03946500 | -0.61462400 | 1.58170300  |  |
| B  | 1.03088500  | -1.84411900 | 0.11495100  |  |
| Br | -2.35345100 | 0.21778100  | -0.38306900 |  |
| F  | -0.07672700 | -2.41995300 | 0.58958600  |  |
| F  | 1.94310000  | -2.70029000 | -0.35721400 |  |

|                                              |              |
|----------------------------------------------|--------------|
| Zero-point correction=                       | 0.118761     |
| (Hartree/Particle)                           |              |
| Thermal correction to Energy=                | 0.128780     |
| Thermal correction to Enthalpy=              | 0.129724     |
| Thermal correction to Gibbs Free Energy=     | 0.080560     |
| Sum of electronic and zero-point Energies=   | -3069.208509 |
| Sum of electronic and thermal Energies=      | -3069.198491 |
| Sum of electronic and thermal Enthalpies=    | -3069.197547 |
| Sum of electronic and thermal Free Energies= | -3069.246710 |

Complex of 1 with 2c – 1.2c.C

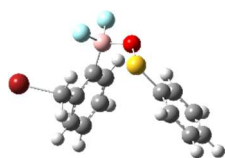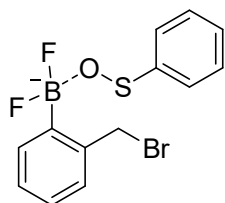

| Atom | x           | y           | z           |
|------|-------------|-------------|-------------|
| -1 1 |             |             |             |
| C    | 0.11569100  | -1.62035000 | 1.79738200  |
| C    | 0.59854400  | -0.54318500 | 1.02978700  |
| C    | 1.17068000  | -0.86517500 | -0.22219900 |
| C    | 1.22345400  | -2.20016100 | -0.66178900 |
| C    | 0.73781200  | -3.23803600 | 0.12188300  |
| C    | 0.18322300  | -2.94288600 | 1.36890000  |
| H    | -0.32359300 | -1.40648200 | 2.76588900  |
| H    | 1.66075400  | -2.41960700 | -1.63133900 |
| H    | 0.78888900  | -4.26178700 | -0.23261100 |
| H    | -0.19818300 | -3.74002400 | 1.99890500  |
| C    | 1.71605900  | 0.17602600  | -1.14155000 |
| H    | 1.41912100  | 1.18467400  | -0.89419300 |
| H    | 1.54222300  | -0.04995700 | -2.18944100 |
| Br   | 3.75796800  | 0.27447800  | -1.06741400 |
| B    | 0.39059400  | 0.94561600  | 1.66050800  |
| O    | -0.98370600 | 1.51327900  | 1.42691600  |
| S    | -1.43304600 | 1.92327000  | -0.11891100 |
| C    | -2.75605600 | 0.78252800  | -0.46189900 |
| C    | -3.20955900 | -0.15142400 | 0.47372200  |
| C    | -3.37494300 | 0.86750300  | -1.71855200 |
| C    | -4.27055200 | -0.99683900 | 0.14759800  |
| H    | -2.72809200 | -0.21083400 | 1.44051600  |
| C    | -4.43333100 | 0.01945400  | -2.03052300 |
| H    | -3.02994000 | 1.59162600  | -2.44995800 |
| C    | -4.88819600 | -0.91896500 | -1.10024500 |
| H    | -4.61450900 | -1.72092200 | 0.87856000  |
| H    | -4.90295100 | 0.09125100  | -3.00558100 |
| H    | -5.71186400 | -1.57888200 | -1.34701500 |
| F    | 0.47722900  | 0.89224500  | 3.08494300  |
| F    | 1.36029500  | 1.89627000  | 1.20343500  |

Zero-point correction= 0.212647  
 (Hartree/Particle)  
 Thermal correction to Energy= 0.230545  
 Thermal correction to Enthalpy= 0.231489  
 Thermal correction to Gibbs Free Energy= 0.162436  
 Sum of electronic and zero-point Energies= -3774.435785  
 Sum of electronic and thermal Energies= -3774.417887  
 Sum of electronic and thermal Enthalpies= -3774.416943  
 Sum of electronic and thermal Free Energies= -3774.485996

Transition state for internal alkylation of **1.2c.C** – **1.2c.C.TS**

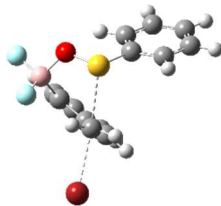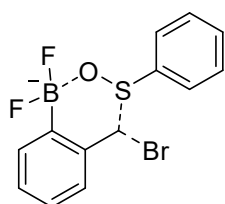

|    |             |             |             |  |
|----|-------------|-------------|-------------|--|
| -1 | 1           |             |             |  |
| C  | 0.12194800  | 2.08216600  | 1.82326400  |  |
| C  | 0.43801000  | 1.44109400  | 0.61828700  |  |
| C  | 0.75133900  | 0.05575900  | 0.68136600  |  |
| C  | 0.66950200  | -0.64539200 | 1.90422300  |  |
| C  | 0.37192500  | 0.02545800  | 3.07842200  |  |
| C  | 0.11496700  | 1.40118200  | 3.03911100  |  |
| H  | -0.13047300 | 3.13660600  | 1.80297300  |  |
| H  | 0.88840300  | -1.70723200 | 1.92124500  |  |
| H  | 0.34169300  | -0.51017400 | 4.02043300  |  |
| H  | -0.10926100 | 1.93400600  | 3.95726000  |  |
| C  | 1.11812500  | -0.65214500 | -0.51573500 |  |
| H  | 1.51583900  | -0.12974200 | -1.36575600 |  |
| H  | 0.99196900  | -1.72099400 | -0.59066800 |  |
| Br | 3.71627500  | -1.38717900 | -0.17773600 |  |
| B  | 0.20346200  | 2.18467800  | -0.79244500 |  |
| O  | -1.02090500 | 1.57165800  | -1.48802500 |  |
| S  | -1.06495500 | -0.01908500 | -1.86315500 |  |
| C  | -2.37738200 | -0.63226000 | -0.82402500 |  |
| C  | -3.02136200 | 0.17802200  | 0.11185600  |  |
| C  | -2.75711300 | -1.97050500 | -0.99094700 |  |
| C  | -4.04933900 | -0.36001400 | 0.88668700  |  |
| H  | -2.72211700 | 1.21160900  | 0.22168200  |  |
| C  | -3.78082700 | -2.49441000 | -0.20765700 |  |
| H  | -2.25988700 | -2.59659100 | -1.72448600 |  |
| C  | -4.43104700 | -1.69192500 | 0.73334500  |  |
| H  | -4.55167900 | 0.26899800  | 1.61309400  |  |
| H  | -4.07319500 | -3.53050800 | -0.33524100 |  |
| H  | -5.23022300 | -2.10328500 | 1.33890400  |  |
| F  | -0.14784300 | 3.54280600  | -0.64424500 |  |
| F  | 1.30851200  | 2.08887200  | -1.68808500 |  |

Zero-point correction= 0.211672  
 (Hartree/Particle)  
 Thermal correction to Energy= 0.229152  
 Thermal correction to Enthalpy= 0.230096

|                                              |              |
|----------------------------------------------|--------------|
| Thermal correction to Gibbs Free Energy=     | 0.163035     |
| Sum of electronic and zero-point Energies=   | -3774.420201 |
| Sum of electronic and thermal Energies=      | -3774.402721 |
| Sum of electronic and thermal Enthalpies=    | -3774.401777 |
| Sum of electronic and thermal Free Energies= | -3774.468838 |

Transition state for reaction of **1** and **2c** w/o precomplexation – **1.2c.TS**

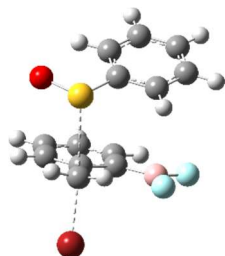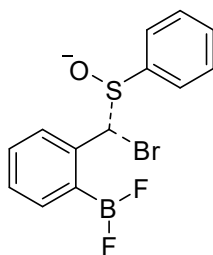

|    |   |             |             |             |
|----|---|-------------|-------------|-------------|
| -1 | 1 |             |             |             |
| C  |   | -1.45006800 | -0.80860900 | -0.47956900 |
| H  |   | -1.67715800 | -1.86042700 | -0.43121600 |
| H  |   | -1.23132800 | -0.41267000 | -1.45451200 |
| C  |   | -0.88166300 | -0.19041200 | 0.71186300  |
| C  |   | -0.92094000 | -0.92417000 | 1.91086900  |
| C  |   | -0.33526500 | 1.12538300  | 0.72733000  |
| C  |   | -0.43339700 | -0.39513200 | 3.09855600  |
| H  |   | -1.34162600 | -1.92277100 | 1.90040500  |
| C  |   | 0.14800900  | 1.63481600  | 1.94630000  |
| C  |   | 0.10028800  | 0.89501200  | 3.12294800  |
| H  |   | -0.47315800 | -0.98617400 | 4.00673700  |
| H  |   | 0.56764800  | 2.63386500  | 1.96730700  |
| H  |   | 0.47681000  | 1.31570800  | 4.04803100  |
| Br |   | -3.70701100 | -0.15524200 | -0.54741500 |
| B  |   | -0.22875500 | 2.05256000  | -0.49742500 |
| S  |   | 1.06117700  | -2.22170000 | -0.98992400 |
| O  |   | 1.22545900  | -3.25439800 | 0.19115000  |
| C  |   | 2.26685600  | -0.94327200 | -0.72144300 |
| C  |   | 3.12481000  | -0.98723800 | 0.38521800  |
| C  |   | 2.36648200  | 0.12246200  | -1.63302200 |
| C  |   | 4.06898900  | 0.02103700  | 0.57346400  |
| H  |   | 3.03839200  | -1.81612800 | 1.07774300  |
| C  |   | 3.31287100  | 1.12348500  | -1.43433100 |
| H  |   | 1.71549500  | 0.15842500  | -2.50095000 |
| C  |   | 4.17003200  | 1.08098200  | -0.32967100 |
| H  |   | 4.73100500  | -0.02180300 | 1.43238500  |
| H  |   | 3.38286800  | 1.94052500  | -2.14467000 |



|   |             |            |             |
|---|-------------|------------|-------------|
| H | 4.90586100  | 1.86250000 | -0.17848900 |
| F | 0.30070000  | 3.28106900 | -0.38501700 |
| F | -0.65738700 | 1.75625800 | -1.73027300 |

|                                              |              |
|----------------------------------------------|--------------|
| Zero-point correction=                       | 0.210814     |
| (Hartree/Particle)                           |              |
| Thermal correction to Energy=                | 0.229406     |
| Thermal correction to Enthalpy=              | 0.230350     |
| Thermal correction to Gibbs Free Energy=     | 0.159082     |
| Sum of electronic and zero-point Energies=   | -3774.381000 |
| Sum of electronic and thermal Energies=      | -3774.362408 |
| Sum of electronic and thermal Enthalpies=    | -3774.361464 |
| Sum of electronic and thermal Free Energies= | -3774.432732 |

Sulfoxide product formed from **1** and **2c**.

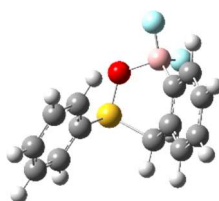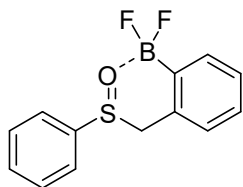

|   |             |             |             |  |
|---|-------------|-------------|-------------|--|
| 0 | 1           |             |             |  |
| C | -2.33448600 | 1.41768200  | 0.84404000  |  |
| C | -1.78141900 | 0.36416900  | 0.10688700  |  |
| C | -1.02587800 | 0.69000700  | -1.03701100 |  |
| C | -0.82353400 | 2.01992300  | -1.41736400 |  |
| C | -1.40538600 | 3.04863500  | -0.67897100 |  |
| C | -2.16349100 | 2.74608200  | 0.45229000  |  |
| H | -2.90743100 | 1.19460700  | 1.73784800  |  |
| H | -0.22356600 | 2.25097100  | -2.29145100 |  |
| H | -1.26237800 | 4.07965500  | -0.98217500 |  |
| H | -2.61427700 | 3.54506000  | 1.03094600  |  |
| C | -0.43189600 | -0.42665600 | -1.83861300 |  |
| H | -1.17861000 | -1.07207200 | -2.30588200 |  |
| H | 0.28586900  | -0.10498800 | -2.59373500 |  |
| B | -1.92195200 | -1.16987100 | 0.54186700  |  |
| O | -0.49638600 | -1.86389500 | 0.45808600  |  |
| S | 0.49983400  | -1.62718900 | -0.75769100 |  |
| C | 1.80774500  | -0.59579000 | -0.06609700 |  |
| C | 1.64350700  | 0.05801000  | 1.15170700  |  |
| C | 3.00143700  | -0.53182800 | -0.78612100 |  |
| C | 2.70228700  | 0.81782000  | 1.64629300  |  |
| H | 0.71900500  | -0.03536500 | 1.70493100  |  |
| C | 4.04540100  | 0.24075700  | -0.28268300 |  |

|   |             |             |             |
|---|-------------|-------------|-------------|
| H | 3.12248600  | -1.07314000 | -1.71791500 |
| C | 3.89525800  | 0.91391300  | 0.93025900  |
| H | 2.59216300  | 1.33194600  | 2.59356800  |
| H | 4.97718000  | 0.30389000  | -0.83159000 |
| H | 4.71379900  | 1.50560900  | 1.32287200  |
| F | -2.75061300 | -1.92336000 | -0.32188200 |
| F | -2.29583100 | -1.37741300 | 1.87009500  |

|                                              |              |
|----------------------------------------------|--------------|
| Zero-point correction=                       | 0.213589     |
| (Hartree/Particle)                           |              |
| Thermal correction to Energy=                | 0.228691     |
| Thermal correction to Enthalpy=              | 0.229635     |
| Thermal correction to Gibbs Free Energy=     | 0.170346     |
| Sum of electronic and zero-point Energies=   | -1200.113270 |
| Sum of electronic and thermal Energies=      | -1200.098168 |
| Sum of electronic and thermal Enthalpies=    | -1200.097224 |
| Sum of electronic and thermal Free Energies= | -1200.156513 |

Ethylene glycol ester of (2-bromoethyl)phenylmethyl boronic acid (reactant – **2Ca**)

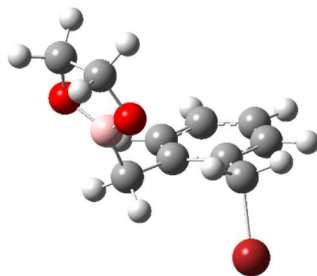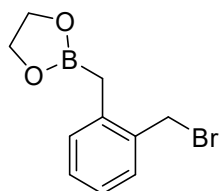

|   |             |             |             |  |
|---|-------------|-------------|-------------|--|
| 0 | 1           |             |             |  |
| C | 0.24701700  | 2.41615300  | 0.86319400  |  |
| C | -0.44274400 | 3.43982000  | 0.21768300  |  |
| C | -1.36665700 | 3.13394600  | -0.78060400 |  |
| C | -1.58581100 | 1.80295000  | -1.11810300 |  |
| C | -0.89269500 | 0.76469900  | -0.47901900 |  |
| C | 0.03961100  | 1.07046000  | 0.53634800  |  |
| H | 0.96010300  | 2.66280300  | 1.64278800  |  |
| H | -0.26070200 | 4.47163200  | 0.49681000  |  |
| H | -1.90965100 | 3.92198800  | -1.28925700 |  |
| H | -2.30446200 | 1.55593400  | -1.89268200 |  |
| C | -1.15666900 | -0.63591200 | -0.91195300 |  |
| H | -0.29646900 | -1.29295700 | -0.85087500 |  |
| H | -1.60519500 | -0.68764700 | -1.89868900 |  |
| C | 0.82829200  | -0.00300800 | 1.26665800  |  |
| H | 0.20524600  | -0.88432600 | 1.43910400  |  |
| H | 1.11788400  | 0.38181800  | 2.24762800  |  |

|    |             |             |             |
|----|-------------|-------------|-------------|
| Br | -2.53621900 | -1.55959400 | 0.26312400  |
| B  | 2.13241800  | -0.41814900 | 0.48541200  |
| O  | 3.36221700  | 0.14006900  | 0.72102200  |
| O  | 2.15193500  | -1.35735900 | -0.51566900 |
| C  | 4.29712400  | -0.38886900 | -0.25008900 |
| H  | 4.58823700  | 0.41913800  | -0.92370500 |
| H  | 5.18003900  | -0.75604800 | 0.27308800  |
| C  | 3.51790100  | -1.51011200 | -0.97258300 |
| H  | 3.54125400  | -1.41094100 | -2.05778300 |
| H  | 3.86384300  | -2.50729700 | -0.69482200 |

|                                              |              |
|----------------------------------------------|--------------|
| Zero-point correction=                       | 0.207076     |
| (Hartree/Particle)                           |              |
| Thermal correction to Energy=                | 0.220326     |
| Thermal correction to Enthalpy=              | 0.221270     |
| Thermal correction to Gibbs Free Energy=     | 0.163111     |
| Sum of electronic and zero-point Energies=   | -3137.796916 |
| Sum of electronic and thermal Energies=      | -3137.783666 |
| Sum of electronic and thermal Enthalpies=    | -3137.782722 |
| Sum of electronic and thermal Free Energies= | -3137.840882 |

Complex of **1** with **2Ca** – **1.2Ca.C**

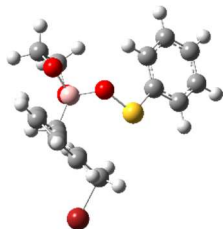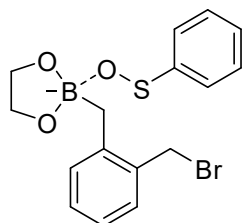

|    |             |             |             |
|----|-------------|-------------|-------------|
| -1 | 1           |             |             |
| S  | 1.37073100  | -0.93640300 | 0.58187300  |
| O  | 1.08379800  | 0.69035600  | 0.63664900  |
| B  | 0.52512600  | 1.41375300  | -0.61492500 |
| O  | 1.38956300  | 1.22424400  | -1.79235000 |
| O  | 0.63464000  | 2.84237900  | -0.26723800 |
| C  | 2.26094500  | 2.34311700  | -1.87087100 |
| H  | 3.19036100  | 2.15740500  | -1.31310900 |
| H  | 2.52367300  | 2.54290000  | -2.91508300 |
| C  | 1.46002100  | 3.48207100  | -1.22897300 |
| H  | 0.84221400  | 3.99625100  | -1.98211600 |
| H  | 2.10012200  | 4.23020700  | -0.74760800 |
| C  | -1.00813800 | 0.91984800  | -0.96727900 |
| H  | -0.97951700 | -0.10213300 | -1.35472400 |

|    |             |             |             |
|----|-------------|-------------|-------------|
| H  | -1.31946900 | 1.54810200  | -1.81132100 |
| C  | 3.14597600  | -1.05087100 | 0.53931500  |
| C  | 3.97197800  | 0.06640500  | 0.69657800  |
| C  | 3.72041800  | -2.32318200 | 0.39139900  |
| C  | 5.35809900  | -0.09046300 | 0.69868600  |
| H  | 3.52068700  | 1.04269100  | 0.81478100  |
| C  | 5.10470100  | -2.46766700 | 0.40149100  |
| H  | 3.08749800  | -3.19599000 | 0.26501400  |
| C  | 5.93384300  | -1.35271600 | 0.55285800  |
| H  | 5.99055900  | 0.78306800  | 0.81793500  |
| H  | 5.53757400  | -3.45527600 | 0.28331500  |
| H  | 7.01159800  | -1.46835200 | 0.55550900  |
| C  | -2.03018400 | 1.06158800  | 0.12640700  |
| C  | -2.43170500 | 2.35244800  | 0.51714200  |
| C  | -2.62125400 | -0.03089200 | 0.80528100  |
| C  | -3.36134500 | 2.56652700  | 1.52805900  |
| H  | -1.98124400 | 3.19963100  | 0.01375100  |
| C  | -3.55829400 | 0.19614600  | 1.82890400  |
| C  | -3.93137500 | 1.48083200  | 2.19847600  |
| H  | -3.64119700 | 3.57992600  | 1.79684000  |
| H  | -3.99801700 | -0.65783400 | 2.33507700  |
| H  | -4.65336800 | 1.63626600  | 2.99216100  |
| C  | -2.29168400 | -1.44135200 | 0.47713800  |
| H  | -1.29220300 | -1.60312800 | 0.09385600  |
| H  | -2.50550300 | -2.12606900 | 1.29135600  |
| Br | -3.46248900 | -2.18631000 | -1.03300400 |

Zero-point correction= 0.300085  
(Hartree/Particle)  
Thermal correction to Energy= 0.321011  
Thermal correction to Enthalpy= 0.321955  
Thermal correction to Gibbs Free Energy= 0.245745  
Sum of electronic and zero-point Energies= -3842.988127  
Sum of electronic and thermal Energies= -3842.967201  
Sum of electronic and thermal Enthalpies= -3842.966257  
Sum of electronic and thermal Free Energies= -3843.042468

Transition state for internal alkylation of **1.2Ca.C** – **1.2Ca.C.TS**

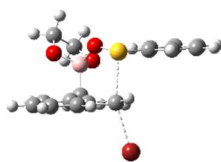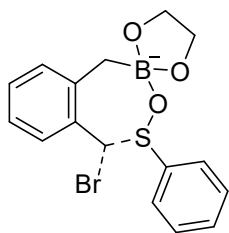

|      |             |             |             |
|------|-------------|-------------|-------------|
| -1 1 |             |             |             |
| C    | 1.30770000  | 0.96479700  | 0.31384600  |
| H    | 1.41512900  | 1.74273100  | 1.05240300  |
| H    | 0.62344600  | 1.14442900  | -0.49225200 |
| Br   | 2.97688400  | 2.41077200  | -1.11289500 |
| S    | -0.97349700 | 0.22466800  | 1.49414200  |
| O    | -1.36125000 | -1.25492700 | 0.94404300  |
| B    | -1.01470900 | -1.98308800 | -0.42755900 |
| O    | -2.17781200 | -1.84227400 | -1.31667700 |
| O    | -0.96267500 | -3.39634100 | -0.06557400 |
| C    | -2.81253000 | -3.10910000 | -1.45086200 |
| H    | -3.90160500 | -2.99825900 | -1.40992000 |
| H    | -2.54927500 | -3.56128100 | -2.41815200 |
| C    | -2.25832900 | -3.94000800 | -0.28727500 |
| H    | -2.18140700 | -5.00592400 | -0.52222400 |
| H    | -2.88587900 | -3.82695100 | 0.60847800  |
| C    | 0.36328100  | -1.44676900 | -1.13258300 |
| H    | 0.18725500  | -0.46355400 | -1.57680400 |
| H    | 0.53371700  | -2.13312000 | -1.96880900 |
| C    | -2.16606000 | 1.36890900  | 0.81537900  |
| C    | -3.06946900 | 1.01959000  | -0.19213700 |
| C    | -2.16614700 | 2.66617500  | 1.34953800  |
| C    | -3.97355600 | 1.97625500  | -0.65671300 |
| H    | -3.05053100 | 0.01781000  | -0.60607600 |
| C    | -3.06686100 | 3.61115700  | 0.86742400  |
| H    | -1.47232200 | 2.93448300  | 2.13985400  |
| C    | -3.97715400 | 3.27005900  | -0.13615900 |
| H    | -4.67642600 | 1.70520900  | -1.43732500 |
| H    | -3.06262800 | 4.61297300  | 1.28243200  |
| H    | -4.68113700 | 4.00665000  | -0.50605200 |
| C    | 1.56797600  | -1.44736300 | -0.24237900 |
| C    | 2.29163600  | -2.63094600 | -0.03723600 |
| C    | 1.96959100  | -0.30044900 | 0.49437500  |
| C    | 3.34403200  | -2.69975500 | 0.87008300  |
| H    | 2.00722700  | -3.51679700 | -0.59352800 |
| C    | 3.01733700  | -0.39170400 | 1.43542600  |
| C    | 3.70678300  | -1.57683300 | 1.62368700  |
| H    | 3.88065200  | -3.63369300 | 0.99898300  |
| H    | 3.29732200  | 0.49564700  | 1.99272600  |
| H    | 4.51953000  | -1.63240100 | 2.33830000  |

Zero-point correction= 0.298959  
 (Hartree/Particle)  
 Thermal correction to Energy= 0.319597  
 Thermal correction to Enthalpy= 0.320541  
 Thermal correction to Gibbs Free Energy= 0.245767  
 Sum of electronic and zero-point Energies= -3842.971673  
 Sum of electronic and thermal Energies= -3842.951035  
 Sum of electronic and thermal Enthalpies= -3842.950091  
 Sum of electronic and thermal Free Energies= -3843.024865

Intrinsic Reaction Coordinate for **1.2Ca.C.TS**

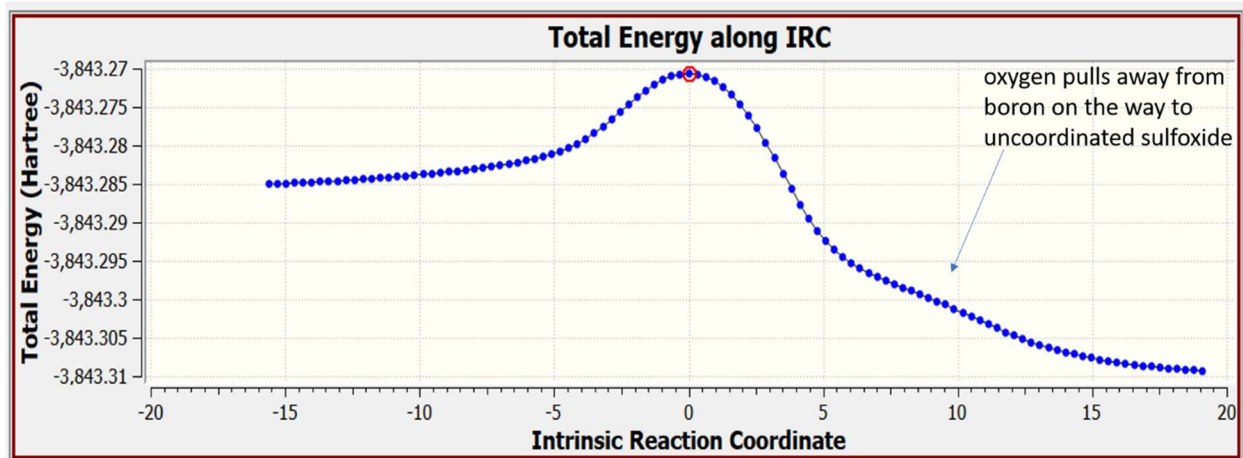

Transition state for reaction of **1** and **2Ca** w/o precomplexation – **1.2Ca.TS**

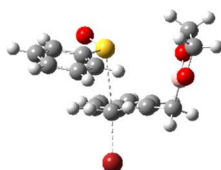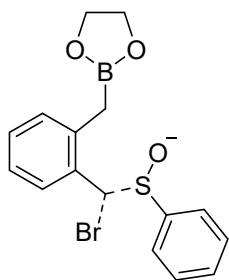

|    |   |             |             |             |
|----|---|-------------|-------------|-------------|
| -1 | 1 |             |             |             |
| C  |   | -0.26742200 | -1.07112100 | -0.16331500 |
| H  |   | 0.60881900  | -1.52479800 | 0.26882900  |
| H  |   | -0.09409700 | -0.42027700 | -1.00242800 |
| Br |   | -0.72036400 | -2.93762600 | -1.57307400 |
| S  |   | 1.20854600  | 1.17975600  | 1.06685500  |
| O  |   | 1.12915600  | 1.05592400  | 2.64235100  |
| B  |   | -1.79863600 | 1.94646800  | -1.12025800 |
| O  |   | -0.89575500 | 2.27089700  | -2.10175100 |
| O  |   | -1.98402200 | 2.95209200  | -0.20651100 |
| C  |   | -0.45207200 | 3.63082700  | -1.88036600 |
| H  |   | 0.63796700  | 3.64859600  | -1.87077200 |
| H  |   | -0.81566400 | 4.25072000  | -2.70234600 |
| C  |   | -1.06746700 | 4.02659900  | -0.51989400 |
| H  |   | -1.62251000 | 4.96420000  | -0.56274900 |
| H  |   | -0.31978300 | 4.08267800  | 0.27290400  |
| C  |   | -2.57613000 | 0.57566900  | -1.07935500 |

|   |             |             |             |
|---|-------------|-------------|-------------|
| H | -2.19477500 | -0.08286600 | -1.86425100 |
| H | -3.61843100 | 0.79338000  | -1.34076400 |
| C | 2.77304700  | 0.48122800  | 0.57779900  |
| C | 3.14173900  | 0.47380500  | -0.77930900 |
| C | 3.64775300  | -0.05715100 | 1.53096600  |
| C | 4.36304700  | -0.06618200 | -1.16758800 |
| H | 2.47431700  | 0.89185600  | -1.52682400 |
| C | 4.87071400  | -0.59534200 | 1.12996000  |
| H | 3.35300800  | -0.04201400 | 2.57365800  |
| C | 5.23761200  | -0.60488800 | -0.21643900 |
| H | 4.63655000  | -0.06737600 | -2.21759500 |
| H | 5.54139400  | -1.00935100 | 1.87618600  |
| H | 6.18882100  | -1.02431500 | -0.52378100 |
| C | -2.55127600 | -0.12049700 | 0.26326300  |
| C | -3.63803400 | -0.00272000 | 1.13258300  |
| C | -1.43669100 | -0.89275200 | 0.67914400  |
| C | -3.64836500 | -0.62534600 | 2.38087600  |
| H | -4.49662300 | 0.58455000  | 0.82379400  |
| C | -1.46404500 | -1.52165400 | 1.93837400  |
| C | -2.55435000 | -1.39015400 | 2.78726300  |
| H | -4.50978900 | -0.51573600 | 3.03040700  |
| H | -0.60987900 | -2.11613600 | 2.24322900  |
| H | -2.55354400 | -1.87785000 | 3.75524200  |

|                                              |              |
|----------------------------------------------|--------------|
| Zero-point correction=                       | 0.299040     |
| (Hartree/Particle)                           |              |
| Thermal correction to Energy=                | 0.320884     |
| Thermal correction to Enthalpy=              | 0.321828     |
| Thermal correction to Gibbs Free Energy=     | 0.241314     |
| Sum of electronic and zero-point Energies=   | -3842.967120 |
| Sum of electronic and thermal Energies=      | -3842.945276 |
| Sum of electronic and thermal Enthalpies=    | -3842.944332 |
| Sum of electronic and thermal Free Energies= | -3843.024845 |

Sulfoxide product formed from **1** and **2Ca**.

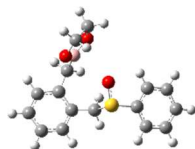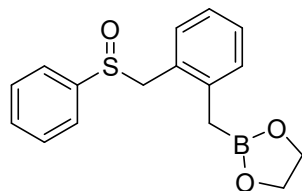

|     |             |             |             |
|-----|-------------|-------------|-------------|
| 0 1 |             |             |             |
| C   | -0.43420100 | -1.37614200 | 0.56283900  |
| H   | -1.10202200 | -2.23470400 | 0.64955200  |
| H   | -0.59825400 | -0.70846000 | 1.40757500  |
| S   | -1.05886000 | -0.43888700 | -0.93656300 |

|   |             |             |             |
|---|-------------|-------------|-------------|
| O | -0.34994000 | 0.91428300  | -0.92008500 |
| B | 2.05480900  | 1.58746200  | 0.52600500  |
| O | 1.55679000  | 2.81869200  | 0.88186000  |
| O | 2.77530600  | 1.61652800  | -0.64134700 |
| C | 1.99447700  | 3.78190200  | -0.10264900 |
| H | 1.13502300  | 4.35904600  | -0.44507200 |
| H | 2.71484200  | 4.45581800  | 0.36695000  |
| C | 2.62715600  | 2.93060400  | -1.22348000 |
| H | 3.60665500  | 3.29654600  | -1.53307300 |
| H | 1.97913200  | 2.85004800  | -2.09845300 |
| C | 1.93316500  | 0.33257600  | 1.47168000  |
| H | 0.99637900  | 0.41372600  | 2.02718600  |
| H | 2.72531700  | 0.44198600  | 2.22438200  |
| C | -2.75421300 | -0.15287300 | -0.32831200 |
| C | -3.07424200 | 1.07966900  | 0.23191900  |
| C | -3.71196300 | -1.15543800 | -0.47883900 |
| C | -4.37865000 | 1.30446900  | 0.67223900  |
| H | -2.31133000 | 1.84532300  | 0.30929700  |
| C | -5.01148500 | -0.92209300 | -0.03131400 |
| H | -3.45633900 | -2.10238200 | -0.94227000 |
| C | -5.34405400 | 0.30553700  | 0.54415100  |
| H | -4.64027200 | 2.26048700  | 1.11113100  |
| H | -5.76411600 | -1.69424200 | -0.14092400 |
| H | -6.35719600 | 0.48526500  | 0.88482700  |
| C | 2.08586600  | -1.01919800 | 0.80966800  |
| C | 3.37901200  | -1.52361600 | 0.60485600  |
| C | 0.99366600  | -1.80535600 | 0.38458100  |
| C | 3.60407400  | -2.74999300 | -0.01122400 |
| H | 4.22653700  | -0.93495300 | 0.94032800  |
| C | 1.23204700  | -3.04507000 | -0.23060600 |
| C | 2.52148700  | -3.52010100 | -0.43584600 |
| H | 4.61861100  | -3.10586700 | -0.15237500 |
| H | 0.38491100  | -3.64636100 | -0.54512300 |
| H | 2.67974100  | -4.48168500 | -0.91035200 |

Zero-point correction= 0.301457  
 (Hartree/Particle)  
 Thermal correction to Energy= 0.320577  
 Thermal correction to Enthalpy= 0.321521  
 Thermal correction to Gibbs Free Energy= 0.250826  
 Sum of electronic and zero-point Energies= -1268.681530  
 Sum of electronic and thermal Energies= -1268.662410  
 Sum of electronic and thermal Enthalpies= -1268.661466  
 Sum of electronic and thermal Free Energies= -1268.732161

Ethylene glycol ester of 2-(2-bromoethyl)phenylethyl boronic acid (reactant – **2C<sub>2</sub>a**)

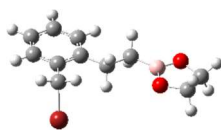



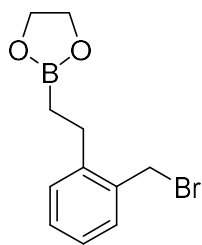

| 0  | 1 |             |             |             |
|----|---|-------------|-------------|-------------|
| C  |   | -0.92127400 | 2.52635800  | -0.28961500 |
| C  |   | -0.83067100 | 1.21197900  | 0.17810500  |
| C  |   | -2.02975600 | 0.55649500  | 0.54711800  |
| C  |   | -3.25487400 | 1.22597700  | 0.43793600  |
| C  |   | -3.32263300 | 2.53492300  | -0.02978300 |
| C  |   | -2.14739400 | 3.18467800  | -0.39578400 |
| H  |   | -0.02170300 | 3.05431600  | -0.57847300 |
| H  |   | -4.16494000 | 0.70978300  | 0.72579500  |
| H  |   | -4.27927100 | 3.03873300  | -0.10530400 |
| H  |   | -2.17858200 | 4.20458100  | -0.76284700 |
| C  |   | -2.03385600 | -0.83534000 | 1.07729900  |
| H  |   | -2.92985000 | -1.06241400 | 1.64554800  |
| H  |   | -1.14870500 | -1.10444400 | 1.64310400  |
| Br |   | -2.06976000 | -2.22992000 | -0.40223900 |
| C  |   | 0.50267000  | 0.49218800  | 0.29996300  |
| H  |   | 0.65014500  | 0.21282500  | 1.34999400  |
| H  |   | 0.43233100  | -0.45808400 | -0.23944000 |
| C  |   | 1.74487900  | 1.25057100  | -0.18566800 |
| H  |   | 1.62947600  | 1.54265500  | -1.23748200 |
| H  |   | 1.86230600  | 2.19478100  | 0.36079300  |
| C  |   | 4.59109100  | -1.19593000 | 0.44892500  |
| C  |   | 5.31886400  | -0.02835900 | -0.25080600 |
| H  |   | 4.87677100  | -1.29840000 | 1.49773300  |
| H  |   | 4.73585400  | -2.15065500 | -0.05692800 |
| H  |   | 6.14953300  | 0.36526500  | 0.33536600  |
| H  |   | 5.67845900  | -0.29748200 | -1.24617500 |
| B  |   | 3.09006000  | 0.45569800  | -0.05678500 |
| O  |   | 4.30972600  | 0.99848000  | -0.38922900 |
| O  |   | 3.18992400  | -0.83897900 | 0.38978700  |

Zero-point correction= 0.235085  
(Hartree/Particle)  
Thermal correction to Energy= 0.249760  
Thermal correction to Enthalpy= 0.250704  
Thermal correction to Gibbs Free Energy= 0.189060  
Sum of electronic and zero-point Energies= -3177.090747  
Sum of electronic and thermal Energies= -3177.076072  
Sum of electronic and thermal Enthalpies= -3177.075127  
Sum of electronic and thermal Free Energies= -3177.136772

Complex of **1** with **2C<sub>2</sub>a** – **2C<sub>2</sub>a.C**

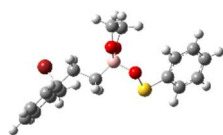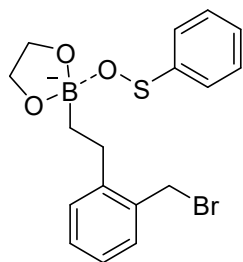

|    |             |             |             |  |
|----|-------------|-------------|-------------|--|
| -1 | 1           |             |             |  |
| O  | 2.22548400  | -1.51914500 | -0.32072100 |  |
| B  | 0.99106100  | -1.25118500 | 0.60433100  |  |
| O  | 1.17532500  | -0.02486500 | 1.39867700  |  |
| O  | 1.05177300  | -2.36029900 | 1.57880600  |  |
| C  | 1.81016600  | -0.39809000 | 2.61205600  |  |
| H  | 2.90462900  | -0.37617700 | 2.50548500  |  |
| H  | 1.53242600  | 0.29635200  | 3.41214500  |  |
| C  | 1.31782500  | -1.83001700 | 2.86884500  |  |
| H  | 0.39776200  | -1.82498300 | 3.47335500  |  |
| H  | 2.06326300  | -2.44006300 | 3.39284800  |  |
| C  | -0.36093400 | -1.22922100 | -0.29347600 |  |
| H  | -0.42605800 | -2.16411700 | -0.86720400 |  |
| H  | -0.31041800 | -0.42590700 | -1.04173500 |  |
| C  | 4.12703600  | 0.25970900  | -1.02383100 |  |
| C  | 4.68328900  | 1.27230600  | -1.82258300 |  |
| C  | 4.82266100  | -0.18807600 | 0.10420000  |  |
| C  | 5.91575300  | 1.82578600  | -1.48934500 |  |
| H  | 4.15136300  | 1.62813300  | -2.69952400 |  |
| C  | 6.05540300  | 0.37774300  | 0.43054100  |  |
| H  | 4.38975200  | -0.97228000 | 0.71116800  |  |
| C  | 6.61083700  | 1.38429000  | -0.35955300 |  |
| H  | 6.33303200  | 2.60960300  | -2.11253900 |  |
| H  | 6.58474000  | 0.02495200  | 1.30960600  |  |
| H  | 7.56913200  | 1.82002500  | -0.10116700 |  |
| C  | -3.46770500 | 0.06708000  | -0.88589800 |  |
| C  | -2.92016300 | -1.09286300 | -0.29467400 |  |
| C  | -4.61801800 | -0.03019200 | -1.68358500 |  |
| C  | -3.56296600 | -2.31524600 | -0.53406900 |  |
| C  | -5.23812800 | -1.25381200 | -1.90915700 |  |
| H  | -5.02729200 | 0.87063400  | -2.13003700 |  |
| C  | -4.70470000 | -2.40416600 | -1.32647700 |  |
| H  | -3.15337500 | -3.21492800 | -0.08556800 |  |
| H  | -6.12460300 | -1.31057800 | -2.53051600 |  |
| H  | -5.17696200 | -3.36712200 | -1.48842000 |  |
| C  | -1.65580300 | -1.06883300 | 0.53594100  |  |
| H  | -1.70552800 | -1.88483800 | 1.26363100  |  |
| H  | -1.60023300 | -0.14622000 | 1.11939900  |  |
| S  | 2.57397600  | -0.44389000 | -1.52883300 |  |
| C  | -2.84567600 | 1.40687100  | -0.70181900 |  |

|    |             |            |             |
|----|-------------|------------|-------------|
| H  | -3.07882000 | 2.09398700 | -1.50880500 |
| H  | -1.77871200 | 1.38509600 | -0.51465300 |
| Br | -3.57477000 | 2.37975600 | 0.93472600  |

|                                              |              |
|----------------------------------------------|--------------|
| Zero-point correction=                       | 0.328330     |
| (Hartree/Particle)                           |              |
| Thermal correction to Energy=                | 0.350678     |
| Thermal correction to Enthalpy=              | 0.351622     |
| Thermal correction to Gibbs Free Energy=     | 0.270846     |
| Sum of electronic and zero-point Energies=   | -3882.282099 |
| Sum of electronic and thermal Energies=      | -3882.259751 |
| Sum of electronic and thermal Enthalpies=    | -3882.258807 |
| Sum of electronic and thermal Free Energies= | -3882.339583 |

Transition state for internal alkylation of **1.2C<sub>2</sub>a.C** – **1.2C<sub>2</sub>a.C.TS**

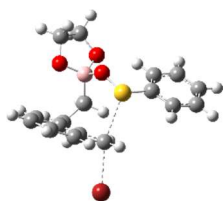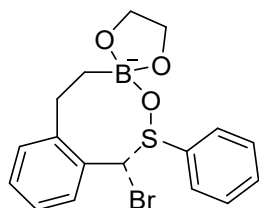

|    |             |             |             |
|----|-------------|-------------|-------------|
| -1 | 1           |             |             |
| C  | -1.46560300 | -0.90580900 | 0.22834200  |
| H  | -1.55349200 | -1.70410300 | 0.94656900  |
| H  | -0.92084400 | -1.10755200 | -0.67354400 |
| Br | -3.47463500 | -2.09625900 | -1.00942400 |
| S  | 0.93138100  | -0.41190400 | 1.36300400  |
| O  | 1.48554800  | 1.02723900  | 0.88549300  |
| B  | 1.49412800  | 1.73470800  | -0.57840800 |
| O  | 2.90647300  | 1.70709700  | -1.00384000 |
| O  | 1.19415100  | 3.13524100  | -0.31681600 |
| C  | 3.43206000  | 3.02701200  | -0.95121600 |
| H  | 4.44096700  | 3.02338100  | -0.52393000 |
| H  | 3.49096200  | 3.45096400  | -1.96485000 |
| C  | 2.42900000  | 3.80444500  | -0.09048200 |
| H  | 2.34261200  | 4.85650500  | -0.37879900 |
| H  | 2.70582400  | 3.75774100  | 0.97250400  |
| C  | 0.49205100  | 0.99534900  | -1.60777400 |
| H  | 0.58653900  | -0.09199100 | -1.51308100 |
| H  | 0.86963500  | 1.21090300  | -2.61577200 |
| C  | 2.08004800  | -1.64775300 | 0.77055100  |
| C  | 1.83715600  | -2.97454600 | 1.15765100  |
| C  | 3.19060900  | -1.33565700 | -0.01902900 |
| C  | 2.70384100  | -3.98338300 | 0.74903400  |

|   |             |             |             |
|---|-------------|-------------|-------------|
| H | 0.98013500  | -3.21853900 | 1.77723500  |
| C | 4.05289600  | -2.35908900 | -0.41651500 |
| H | 3.36924300  | -0.30895600 | -0.31679600 |
| C | 3.81705400  | -3.68070600 | -0.03964000 |
| H | 2.51098000  | -5.00711800 | 1.05018900  |
| H | 4.91514300  | -2.11648000 | -1.02852200 |
| H | 4.49155900  | -4.46852000 | -0.35489500 |
| C | -1.96657600 | 0.40131600  | 0.54941500  |
| C | -1.73680300 | 1.51703600  | -0.29672000 |
| C | -2.67316000 | 0.56791100  | 1.76060900  |
| C | -2.24873900 | 2.75340600  | 0.10924200  |
| C | -3.16596100 | 1.80497400  | 2.13798800  |
| H | -2.83539700 | -0.29838800 | 2.39287200  |
| C | -2.95251500 | 2.90500700  | 1.30161500  |
| H | -2.08368500 | 3.61850200  | -0.52304300 |
| H | -3.71036900 | 1.91817300  | 3.06818100  |
| H | -3.33187000 | 3.88171400  | 1.58154300  |
| C | -1.00484100 | 1.41338600  | -1.61717300 |
| H | -1.07551700 | 2.39331300  | -2.09534000 |
| H | -1.56540900 | 0.72241500  | -2.26081300 |

Zero-point correction= 0.327493  
(Hartree/Particle)  
Thermal correction to Energy= 0.349390  
Thermal correction to Enthalpy= 0.350334  
Thermal correction to Gibbs Free Energy= 0.273256  
Sum of electronic and zero-point Energies= -3882.259473  
Sum of electronic and thermal Energies= -3882.237576  
Sum of electronic and thermal Enthalpies= -3882.236632  
Sum of electronic and thermal Free Energies= -3882.313710

Transition state for reaction of **1** and **2C<sub>2</sub>a** w/o precomplexation – **1.2C<sub>2</sub>a.TS**

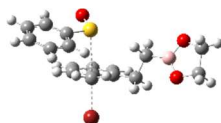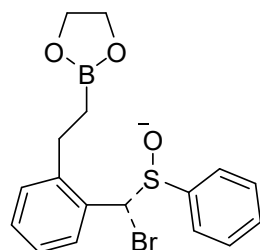

|    |             |             |             |
|----|-------------|-------------|-------------|
| -1 | 1           |             |             |
| C  | -0.59041900 | -0.71704700 | -0.35905700 |
| H  | 0.32604300  | -1.27736000 | -0.28252500 |
| H  | -0.64405000 | -0.00789000 | -1.16618400 |
| Br | -1.67156000 | -2.41658100 | -1.65076400 |
| S  | 1.48031100  | 1.28124400  | 0.39312300  |
| O  | 1.50032000  | 1.55960300  | 1.94996700  |

|   |             |             |             |
|---|-------------|-------------|-------------|
| C | -2.95147500 | 1.14966500  | -0.30885000 |
| H | -2.77821500 | 0.59323900  | -1.23243300 |
| H | -4.03382600 | 1.29486700  | -0.24292400 |
| C | 2.79819200  | 0.12828600  | 0.06630200  |
| C | 3.04628500  | -0.29608400 | -1.25144600 |
| C | 3.59834000  | -0.35962400 | 1.10828100  |
| C | 4.07591200  | -1.19354000 | -1.51318100 |
| H | 2.43571400  | 0.07868100  | -2.06748900 |
| C | 4.62881700  | -1.25877200 | 0.83351400  |
| H | 3.39875900  | -0.02145600 | 2.11834600  |
| C | 4.87553600  | -1.68227000 | -0.47322500 |
| H | 4.25795600  | -1.51421700 | -2.53364300 |
| H | 5.24350300  | -1.63010500 | 1.64736300  |
| H | 5.67754000  | -2.38105300 | -0.68218700 |
| C | -2.50866500 | 0.33190600  | 0.88508600  |
| C | -3.22016100 | 0.43499000  | 2.08303800  |
| C | -1.38608100 | -0.53360700 | 0.84159900  |
| C | -2.85552700 | -0.28609200 | 3.21967400  |
| H | -4.08440000 | 1.09062400  | 2.12365600  |
| C | -1.03235900 | -1.26052200 | 1.99527200  |
| C | -1.75220700 | -1.13940100 | 3.17556400  |
| H | -3.43206100 | -0.18461400 | 4.13249400  |
| H | -0.17684400 | -1.92564400 | 1.95078300  |
| H | -1.45928700 | -1.70495400 | 4.05267600  |
| C | -2.26480200 | 2.53308000  | -0.39571200 |
| H | -1.17489600 | 2.40306300  | -0.42057700 |
| H | -2.45822400 | 3.10465100  | 0.51921300  |
| B | -2.66809600 | 3.39805500  | -1.63760800 |
| O | -2.47212100 | 4.75925700  | -1.70318300 |
| O | -3.23263000 | 2.89085300  | -2.78385700 |
| C | -3.52034600 | 3.99047800  | -3.67776300 |
| H | -4.60395000 | 4.11334800  | -3.73711200 |
| H | -3.13191600 | 3.75487600  | -4.66881300 |
| C | -2.82302100 | 5.20613500  | -3.03261100 |
| H | -1.90736200 | 5.48790600  | -3.55714700 |
| H | -3.47398000 | 6.07743800  | -2.95597900 |

Zero-point correction= 0.327208  
 (Hartree/Particle)  
 Thermal correction to Energy= 0.350540  
 Thermal correction to Enthalpy= 0.351484  
 Thermal correction to Gibbs Free Energy= 0.266405  
 Sum of electronic and zero-point Energies= -3882.261066  
 Sum of electronic and thermal Energies= -3882.237734  
 Sum of electronic and thermal Enthalpies= -3882.236790  
 Sum of electronic and thermal Free Energies= -3882.321869

Sulfoxide product formed from **1** and **2C<sub>2a</sub>**.

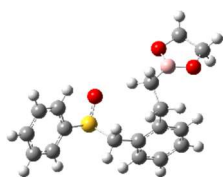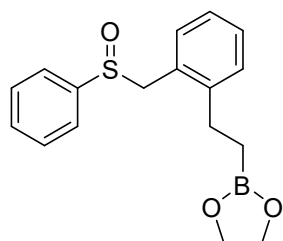

| 0 | 1 |             |             |             |
|---|---|-------------|-------------|-------------|
| C |   | -1.14627800 | -1.08198000 | 0.54465500  |
| H |   | -1.92617500 | -1.79982900 | 0.80750300  |
| H |   | -1.12851900 | -0.28626400 | 1.28628900  |
| S |   | -1.77715000 | -0.28731700 | -1.03542400 |
| O |   | -0.91931800 | 0.94952200  | -1.28765200 |
| B |   | 3.00980300  | 1.49768500  | 0.30188000  |
| O |   | 3.16832100  | 2.18914000  | -0.87679000 |
| O |   | 4.20826700  | 1.06849800  | 0.82553400  |
| C |   | 4.58343900  | 2.33738600  | -1.13338100 |
| H |   | 4.79070600  | 2.05022900  | -2.16447900 |
| H |   | 4.85395300  | 3.38614400  | -0.99226500 |
| C |   | 5.26215200  | 1.41060400  | -0.10354700 |
| H |   | 6.07153200  | 1.89961000  | 0.43918700  |
| H |   | 5.63850100  | 0.48984800  | -0.55476400 |
| C |   | 1.62081200  | 1.28176700  | 0.99407300  |
| H |   | 0.81881000  | 1.38858300  | 0.25770400  |
| H |   | 1.49363200  | 2.11436500  | 1.70188100  |
| C |   | -3.36415000 | 0.30627000  | -0.35956800 |
| C |   | -4.43325300 | -0.58139900 | -0.24012500 |
| C |   | -3.49524500 | 1.65035700  | -0.02630300 |
| C |   | -5.65074900 | -0.11201100 | 0.25019400  |
| H |   | -4.32648200 | -1.62150300 | -0.52900200 |
| C |   | -4.71913700 | 2.11062500  | 0.46021400  |
| H |   | -2.65130500 | 2.31733300  | -0.15729500 |
| C |   | -5.79315000 | 1.23176600  | 0.60116000  |
| H |   | -6.48811200 | -0.79288800 | 0.34957400  |
| H |   | -4.83327400 | 3.15573300  | 0.72428700  |
| H |   | -6.74328200 | 1.59398800  | 0.97645900  |
| C |   | 0.18041100  | -1.75879200 | 0.33274800  |
| C |   | 1.38104000  | -1.27907100 | 0.89886900  |
| C |   | 0.20388800  | -2.92479000 | -0.44874500 |
| C |   | 2.56224900  | -1.99367400 | 0.64697800  |
| C |   | 1.38669000  | -3.61186600 | -0.69462600 |
| H |   | -0.72564000 | -3.29955200 | -0.86570100 |
| C |   | 2.57666000  | -3.13951400 | -0.14230900 |
| H |   | 3.48688100  | -1.63604000 | 1.08638400  |
| H |   | 1.37819900  | -4.51004200 | -1.30149400 |
| H |   | 3.50835600  | -3.66662400 | -0.31539700 |

|                                              |            |             |              |
|----------------------------------------------|------------|-------------|--------------|
| C                                            | 1.45349400 | -0.04378800 | 1.77785100   |
| H                                            | 2.29514700 | -0.16360300 | 2.46506400   |
| H                                            | 0.56106100 | 0.02055100  | 2.40589200   |
| Zero-point correction=                       |            |             | 0.330000     |
| (Hartree/Particle)                           |            |             |              |
| Thermal correction to Energy=                |            |             | 0.350513     |
| Thermal correction to Enthalpy=              |            |             | 0.351457     |
| Thermal correction to Gibbs Free Energy=     |            |             | 0.276165     |
| Sum of electronic and zero-point Energies=   |            |             | -1307.973885 |
| Sum of electronic and thermal Energies=      |            |             | -1307.953372 |
| Sum of electronic and thermal Enthalpies=    |            |             | -1307.952428 |
| Sum of electronic and thermal Free Energies= |            |             | -1308.027720 |

Ethylene glycol ester of 2-(2-bromoethyl)phenyl boronic acid (reactant – **3a**)

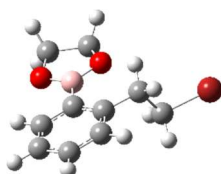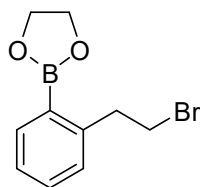

|   |   |             |             |             |
|---|---|-------------|-------------|-------------|
| 0 | 1 |             |             |             |
| C |   | -2.95996200 | -1.03040100 | -0.27903500 |
| C |   | -1.71222700 | -0.46917100 | 0.05432800  |
| C |   | -0.64432100 | -1.34646900 | 0.36128300  |
| C |   | -0.86087800 | -2.72925100 | 0.31697000  |
| C |   | -2.10309200 | -3.26092600 | -0.02091800 |
| C |   | -3.16194600 | -2.40627000 | -0.32163800 |
| H |   | -3.78547600 | -0.36577200 | -0.50708100 |
| H |   | -0.04251800 | -3.39978300 | 0.55901400  |
| H |   | -2.24269600 | -4.33611300 | -0.04373100 |
| H |   | -4.13469200 | -2.80790600 | -0.58210300 |
| C |   | 0.74778400  | -0.85580300 | 0.72534400  |
| H |   | 1.25309500  | -1.62061200 | 1.31924700  |
| H |   | 0.69458400  | 0.05374200  | 1.32207100  |
| B |   | -1.62381300 | 1.08818800  | 0.06025800  |
| O |   | -2.72807700 | 1.87339200  | -0.18113700 |
| O |   | -0.48878400 | 1.82981800  | 0.28494500  |
| C |   | -0.81123700 | 3.22777600  | 0.09605200  |
| C |   | -2.34941700 | 3.25782700  | -0.01397100 |
| H |   | -0.43357800 | 3.79649300  | 0.94572400  |
| H |   | -0.31939100 | 3.57382500  | -0.81529600 |
| H |   | -2.82492700 | 3.63954600  | 0.89199500  |
| H |   | -2.70227100 | 3.82979800  | -0.87229600 |
| C |   | 1.55860700  | -0.58239400 | -0.53661200 |

|    |            |             |             |
|----|------------|-------------|-------------|
| H  | 1.70101600 | -1.47205800 | -1.14489300 |
| H  | 1.13948700 | 0.22332500  | -1.13177500 |
| Br | 3.40947000 | 0.02826800  | -0.09609900 |

|                                              |              |
|----------------------------------------------|--------------|
| Zero-point correction=                       | 0.207738     |
| (Hartree/Particle)                           |              |
| Thermal correction to Energy=                | 0.220948     |
| Thermal correction to Enthalpy=              | 0.221892     |
| Thermal correction to Gibbs Free Energy=     | 0.164856     |
| Sum of electronic and zero-point Energies=   | -3137.797351 |
| Sum of electronic and thermal Energies=      | -3137.784142 |
| Sum of electronic and thermal Enthalpies=    | -3137.783197 |
| Sum of electronic and thermal Free Energies= | -3137.840234 |

### Complex of 1 with 3a - 1.3a.C

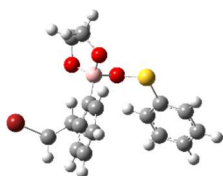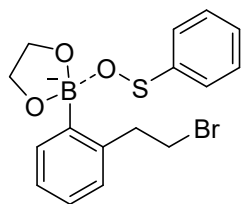

|    |             |             |             |  |
|----|-------------|-------------|-------------|--|
| -1 | 1           |             |             |  |
| C  | -0.24344500 | 0.85282900  | 2.40461700  |  |
| C  | -0.43478100 | 0.53688000  | 1.04705900  |  |
| C  | -0.87992300 | -0.77380300 | 0.75022700  |  |
| C  | -1.08724400 | -1.69640200 | 1.78568100  |  |
| C  | -0.88040000 | -1.35466700 | 3.12051400  |  |
| C  | -0.45772700 | -0.06444700 | 3.43315200  |  |
| H  | 0.08135400  | 1.85762000  | 2.65133300  |  |
| H  | -1.41545900 | -2.70530100 | 1.55480300  |  |
| H  | -1.04912100 | -2.08782700 | 3.90263100  |  |
| H  | -0.29530500 | 0.22405800  | 4.46717700  |  |
| C  | -1.09596700 | -1.21988100 | -0.68885200 |  |
| H  | -0.24300500 | -1.84205500 | -1.00009400 |  |
| H  | -1.10123700 | -0.35289200 | -1.34639300 |  |
| B  | -0.10469600 | 1.68363000  | -0.06567600 |  |
| O  | 0.08505600  | 3.02497600  | 0.53216600  |  |
| O  | -1.14564300 | 1.85939300  | -1.08593800 |  |
| C  | -1.14173200 | 3.23408800  | -1.44833100 |  |
| C  | -0.73925900 | 3.95444000  | -0.15541900 |  |
| H  | -0.40850900 | 3.42467600  | -2.24535200 |  |
| H  | -2.13175800 | 3.52656500  | -1.81203500 |  |
| H  | -0.19477600 | 4.88631800  | -0.34663700 |  |
| H  | -1.62656500 | 4.19574600  | 0.44973600  |  |
| C  | 4.65367100  | -0.34333300 | 0.23668900  |  |



|    |             |             |             |
|----|-------------|-------------|-------------|
| C  | 5.31060300  | -1.55049500 | 0.02069700  |
| C  | 4.73423200  | -2.53992700 | -0.78171200 |
| C  | 3.49146400  | -2.30133600 | -1.36802700 |
| C  | 2.82490500  | -1.09279000 | -1.16315300 |
| C  | 3.40107800  | -0.10722400 | -0.35426000 |
| H  | 5.11003700  | 0.41400900  | 0.86649300  |
| H  | 6.27563400  | -1.72150800 | 0.48577600  |
| H  | 3.03360300  | -3.05974300 | -1.99464000 |
| H  | 1.86374900  | -0.89971500 | -1.62039200 |
| S  | 2.63593300  | 1.47140300  | -0.07740200 |
| O  | 1.18225600  | 1.31333600  | -0.86246300 |
| H  | 5.24767800  | -3.48047800 | -0.94501600 |
| C  | -2.31644800 | -2.07882100 | -0.97239900 |
| H  | -2.36514600 | -2.36724900 | -2.01937900 |
| H  | -2.39307200 | -2.96415100 | -0.34777100 |
| Br | -4.05277300 | -1.12345600 | -0.65721300 |

|                                              |              |
|----------------------------------------------|--------------|
| Zero-point correction=                       | 0.300513     |
| (Hartree/Particle)                           |              |
| Thermal correction to Energy=                | 0.321471     |
| Thermal correction to Enthalpy=              | 0.322415     |
| Thermal correction to Gibbs Free Energy=     | 0.246210     |
| Sum of electronic and zero-point Energies=   | -3842.983647 |
| Sum of electronic and thermal Energies=      | -3842.962688 |
| Sum of electronic and thermal Enthalpies=    | -3842.961744 |
| Sum of electronic and thermal Free Energies= | -3843.037950 |

Transition state for internal alkylation of **1.3a.C** – **1.3a.C.TS**

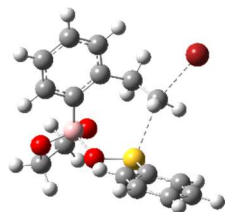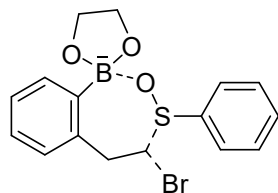

|    |             |            |             |
|----|-------------|------------|-------------|
| -1 | 1           |            |             |
| C  | 1.09367500  | 0.79743100 | -0.91909400 |
| H  | 1.58680700  | 0.47618700 | -1.82177500 |
| H  | 1.45508300  | 0.41420000 | 0.01880000  |
| C  | -0.12908000 | 1.66723700 | -0.99806700 |
| H  | -0.79037800 | 1.26034900 | -1.76674200 |
| H  | 0.18388600  | 2.64914400 | -1.36332500 |
| C  | -0.88165300 | 1.80603500 | 0.31342800  |
| C  | -0.53227100 | 2.86077500 | 1.16809500  |
| C  | -1.90348300 | 0.89950900 | 0.67691100  |

|    |             |             |             |
|----|-------------|-------------|-------------|
| C  | -1.16571900 | 3.03600200  | 2.39672700  |
| H  | 0.24908400  | 3.55031600  | 0.86454900  |
| C  | -2.52408000 | 1.10292800  | 1.92277700  |
| C  | -2.16851700 | 2.14582200  | 2.77762500  |
| H  | -0.88181200 | 3.85929500  | 3.04392000  |
| H  | -3.31823100 | 0.42573600  | 2.21846000  |
| H  | -2.67577600 | 2.26811400  | 3.72960100  |
| C  | -4.30066400 | -1.45759400 | -0.94562500 |
| C  | -3.84966500 | -0.54296400 | -2.09333500 |
| H  | -3.95897600 | -2.48895700 | -1.10984800 |
| H  | -5.38589300 | -1.46881400 | -0.80943300 |
| H  | -3.75672100 | -1.07727400 | -3.04482800 |
| H  | -4.55144500 | 0.29092700  | -2.23326300 |
| S  | -0.04982600 | -1.53435700 | -1.06011200 |
| O  | -1.37732300 | -1.53424600 | -0.10835500 |
| O  | -3.67506400 | -0.90051400 | 0.20480100  |
| O  | -2.58212600 | -0.04087200 | -1.67637900 |
| B  | -2.41244800 | -0.33576700 | -0.24239600 |
| C  | 1.13516300  | -2.36246200 | -0.01634000 |
| C  | 2.35469100  | -2.74467400 | -0.59049800 |
| C  | 0.87343300  | -2.62977700 | 1.32938300  |
| C  | 3.31459400  | -3.38015100 | 0.19220400  |
| H  | 2.55252000  | -2.55116900 | -1.63958500 |
| C  | 1.84073700  | -3.27548800 | 2.09955400  |
| H  | -0.07749300 | -2.33597800 | 1.75360200  |
| C  | 3.06187200  | -3.64939200 | 1.53927800  |
| H  | 4.25881300  | -3.67151200 | -0.25391100 |
| H  | 1.63596600  | -3.48414400 | 3.14386400  |
| H  | 3.80950900  | -4.14969500 | 2.14381500  |
| Br | 3.03675500  | 2.46935500  | -0.71939400 |

Zero-point correction= 0.299546  
(Hartree/Particle)  
Thermal correction to Energy= 0.320068  
Thermal correction to Enthalpy= 0.321012  
Thermal correction to Gibbs Free Energy= 0.246734  
Sum of electronic and zero-point Energies= -3842.962024  
Sum of electronic and thermal Energies= -3842.941503  
Sum of electronic and thermal Enthalpies= -3842.940559  
Sum of electronic and thermal Free Energies= -3843.014836

Transition state for reaction of **1** and **3a** w/o precomplexation – **1.3a.TS**

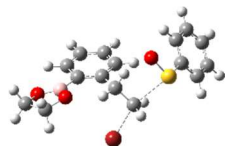

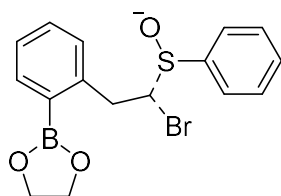

|                                          |             |             |             |
|------------------------------------------|-------------|-------------|-------------|
| -1 1                                     |             |             |             |
| C                                        | 0.30593000  | -1.42699800 | 0.12510500  |
| H                                        | 0.36256000  | -2.39730500 | 0.58713300  |
| H                                        | 1.01320500  | -1.22218600 | -0.66161500 |
| Br                                       | -1.28675300 | -2.36450300 | -1.55165400 |
| C                                        | -0.42128100 | -0.33772600 | 0.81637600  |
| H                                        | -1.31931800 | -0.73271800 | 1.28492800  |
| H                                        | 0.24654200  | -0.02680400 | 1.66275900  |
| C                                        | -0.72340700 | 0.89131400  | -0.01858200 |
| C                                        | -2.03153000 | 1.40578200  | -0.17827300 |
| C                                        | 0.34571200  | 1.54788300  | -0.64279900 |
| C                                        | -2.20518100 | 2.55390200  | -0.97896300 |
| C                                        | 0.14998600  | 2.68255900  | -1.42405600 |
| H                                        | 1.35300800  | 1.16920700  | -0.50796200 |
| C                                        | -1.13656200 | 3.19175900  | -1.59785600 |
| H                                        | -3.20650300 | 2.94798300  | -1.11134400 |
| H                                        | 0.99975800  | 3.16872500  | -1.89128700 |
| H                                        | -1.30220200 | 4.07487500  | -2.20496400 |
| B                                        | -3.32746800 | 0.81290900  | 0.45555400  |
| O                                        | -4.57687500 | 1.19356800  | 0.01081300  |
| O                                        | -3.39982300 | -0.08011400 | 1.50043200  |
| C                                        | -4.78644600 | -0.43489700 | 1.70283600  |
| H                                        | -5.01279400 | -0.39310000 | 2.76831800  |
| H                                        | -4.93764500 | -1.45471700 | 1.34187200  |
| C                                        | -5.56903300 | 0.60364900  | 0.87778000  |
| H                                        | -6.35637400 | 0.15784400  | 0.26955900  |
| H                                        | -5.99907200 | 1.39162100  | 1.50091000  |
| S                                        | 2.54810700  | -1.14183300 | 1.78607400  |
| O                                        | 1.87915600  | -0.05574200 | 2.72465600  |
| C                                        | 3.68686300  | -0.26200000 | 0.72489800  |
| C                                        | 4.39723500  | -0.96853500 | -0.25864900 |
| C                                        | 3.89758900  | 1.11236600  | 0.87970900  |
| C                                        | 5.30277300  | -0.30022300 | -1.07657600 |
| H                                        | 4.24049700  | -2.03576700 | -0.38273100 |
| C                                        | 4.80937800  | 1.77237800  | 0.05506900  |
| H                                        | 3.34396200  | 1.64229200  | 1.64582500  |
| C                                        | 5.51507600  | 1.07448000  | -0.92543600 |
| H                                        | 5.84560100  | -0.85290100 | -1.83605300 |
| H                                        | 4.96846000  | 2.83832400  | 0.18138400  |
| H                                        | 6.22202400  | 1.59114400  | -1.56451300 |
| Zero-point correction=                   |             |             | 0.299186    |
| (Hartree/Particle)                       |             |             |             |
| Thermal correction to Energy=            |             |             | 0.320778    |
| Thermal correction to Enthalpy=          |             |             | 0.321722    |
| Thermal correction to Gibbs Free Energy= |             |             | 0.242037    |

Sum of electronic and zero-point Energies= -3842.961092  
 Sum of electronic and thermal Energies= -3842.939500  
 Sum of electronic and thermal Enthalpies= -3842.938556  
 Sum of electronic and thermal Free Energies= -3843.018241

Sulfoxide product formed from **1** and **3a**.

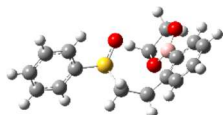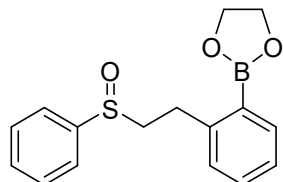

| 0 | 1 |             |             |             |
|---|---|-------------|-------------|-------------|
| C |   | -0.79105200 | 0.83821300  | 1.21303700  |
| H |   | -1.50142000 | 0.73823100  | 2.03691400  |
| H |   | -1.02315400 | 1.74513500  | 0.64996600  |
| C |   | 0.65038800  | 0.82582600  | 1.75191000  |
| H |   | 0.90733100  | -0.17869800 | 2.08513100  |
| H |   | 0.63958500  | 1.45916200  | 2.64466000  |
| C |   | 1.70370000  | 1.37576100  | 0.80453800  |
| C |   | 1.81494100  | 2.76913400  | 0.70775300  |
| C |   | 2.56313800  | 0.56269200  | 0.03114000  |
| C |   | 2.74458900  | 3.37166500  | -0.13524400 |
| H |   | 1.16263400  | 3.39435300  | 1.30990600  |
| C |   | 3.49626400  | 1.19393100  | -0.81481700 |
| C |   | 3.59453500  | 2.57833000  | -0.90408900 |
| H |   | 2.80823500  | 4.45320200  | -0.18564900 |
| H |   | 4.15693500  | 0.57623700  | -1.41251700 |
| H |   | 4.32565100  | 3.03374800  | -1.56259200 |
| C |   | 3.16541000  | -3.11207600 | -0.61208800 |
| C |   | 2.07375900  | -3.18594000 | 0.47297200  |
| H |   | 2.90540700  | -3.66638700 | -1.51401700 |
| H |   | 4.13772200  | -3.45252800 | -0.24855800 |
| H |   | 1.11795000  | -3.53975200 | 0.08029500  |
| H |   | 2.36124400  | -3.79938500 | 1.32686000  |
| S |   | -1.18300200 | -0.58961300 | 0.09841300  |
| O |   | -0.52860400 | -0.31811300 | -1.25608300 |
| O |   | 3.26095900  | -1.70685100 | -0.93159100 |
| O |   | 1.90851000  | -1.81698600 | 0.90973200  |
| B |   | 2.55623600  | -0.99659900 | 0.01449000  |
| C |   | -2.96040700 | -0.22181300 | -0.10218000 |
| C |   | -3.85558800 | -0.58084400 | 0.90545000  |
| C |   | -3.39822000 | 0.35743200  | -1.28826900 |
| C |   | -5.21420800 | -0.32569000 | 0.72708300  |
| H |   | -3.50563400 | -1.05785100 | 1.81483700  |
| C |   | -4.76074600 | 0.60607700  | -1.45845300 |
| H |   | -2.67732900 | 0.59913100  | -2.06044300 |

|   |             |             |             |
|---|-------------|-------------|-------------|
| C | -5.66635300 | 0.26840800  | -0.45287100 |
| H | -5.91861000 | -0.59835100 | 1.50442900  |
| H | -5.11318400 | 1.05958000  | -2.37784300 |
| H | -6.72433500 | 0.45993800  | -0.59014100 |

|                                              |              |
|----------------------------------------------|--------------|
| Zero-point correction=                       | 0.302248     |
| (Hartree/Particle)                           |              |
| Thermal correction to Energy=                | 0.321392     |
| Thermal correction to Enthalpy=              | 0.322336     |
| Thermal correction to Gibbs Free Energy=     | 0.250749     |
| Sum of electronic and zero-point Energies=   | -1268.677897 |
| Sum of electronic and thermal Energies=      | -1268.658753 |
| Sum of electronic and thermal Enthalpies=    | -1268.657809 |
| Sum of electronic and thermal Free Energies= | -1268.729396 |

Ethylene glycol ester of 2-(3-bromopropyl)phenyl boronic acid (reactant – **4a**)

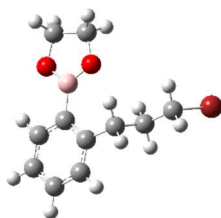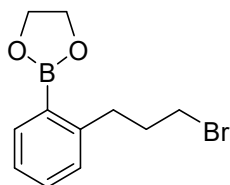

|   |             |             |             |  |
|---|-------------|-------------|-------------|--|
| 0 | 1           |             |             |  |
| C | -3.32160500 | -0.90947800 | -0.61609700 |  |
| C | -2.15298200 | -0.41657700 | -0.00259800 |  |
| C | -1.22678700 | -1.34955300 | 0.52387400  |  |
| C | -1.50481400 | -2.71814400 | 0.41636800  |  |
| C | -2.66561400 | -3.18211700 | -0.19779100 |  |
| C | -3.58295700 | -2.27180600 | -0.71965900 |  |
| H | -4.03799300 | -0.20071300 | -1.01577300 |  |
| H | -0.79805600 | -3.43271600 | 0.82650900  |  |
| H | -2.85329400 | -4.24835600 | -0.26355900 |  |
| H | -4.49211500 | -2.61977900 | -1.19699100 |  |
| C | 0.07529000  | -0.93671600 | 1.18125100  |  |
| H | 0.38236800  | -1.72339700 | 1.87723200  |  |
| H | -0.06498300 | -0.02365900 | 1.76097700  |  |
| B | -1.99266700 | 1.13402100  | 0.04472500  |  |
| O | -2.94393300 | 1.97069200  | -0.49713000 |  |
| O | -0.94243800 | 1.82646800  | 0.60082800  |  |
| C | -1.13245800 | 3.23553800  | 0.33369900  |  |
| C | -2.57561100 | 3.33496000  | -0.19818000 |  |
| H | -0.97798600 | 3.79617700  | 1.25564000  |  |
| H | -0.39209000 | 3.54852500  | -0.40566900 |  |
| H | -3.26942600 | 3.72540900  | 0.54973000  |  |

|    |             |             |             |
|----|-------------|-------------|-------------|
| H  | -2.65350000 | 3.93324400  | -1.10613000 |
| C  | 1.20578600  | -0.71024800 | 0.15109200  |
| H  | 1.37696300  | -1.63068900 | -0.41401300 |
| H  | 0.90133700  | 0.06146000  | -0.55929700 |
| C  | 2.48408800  | -0.28813500 | 0.85057200  |
| H  | 2.86462000  | -1.04748600 | 1.52993000  |
| H  | 2.38270700  | 0.66015100  | 1.37309000  |
| Br | 3.97347800  | 0.01223200  | -0.44571600 |

|                                              |              |
|----------------------------------------------|--------------|
| Zero-point correction=                       | 0.236017     |
| (Hartree/Particle)                           |              |
| Thermal correction to Energy=                | 0.250626     |
| Thermal correction to Enthalpy=              | 0.251571     |
| Thermal correction to Gibbs Free Energy=     | 0.190470     |
| Sum of electronic and zero-point Energies=   | -3177.093447 |
| Sum of electronic and thermal Energies=      | -3177.078837 |
| Sum of electronic and thermal Enthalpies=    | -3177.077893 |
| Sum of electronic and thermal Free Energies= | -3177.138994 |

Complex of **1** with **4a** – **1.4a.C**

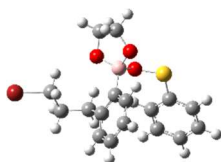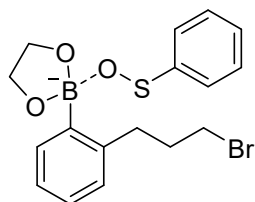

|    |             |             |             |
|----|-------------|-------------|-------------|
| -1 | 1           |             |             |
| C  | 0.42211700  | 0.88789600  | 2.50192100  |
| C  | 0.10092600  | 0.53034000  | 1.17917000  |
| C  | -0.36262700 | -0.78955600 | 0.96589200  |
| C  | -0.46836200 | -1.68028300 | 2.04520600  |
| C  | -0.13634700 | -1.29846900 | 3.34316000  |
| C  | 0.31113000  | 0.00169400  | 3.57349400  |
| H  | 0.76773400  | 1.89942600  | 2.68589300  |
| H  | -0.81412000 | -2.69504800 | 1.86551500  |
| H  | -0.22337700 | -2.00736700 | 4.16040000  |
| H  | 0.57430300  | 0.32084600  | 4.57741500  |
| C  | -0.75948100 | -1.29731300 | -0.41182600 |
| H  | -0.19596600 | -2.21128300 | -0.63310700 |
| H  | -0.48944800 | -0.56170900 | -1.16761000 |
| B  | 0.29612800  | 1.63839300  | -0.00015400 |
| O  | 0.56526900  | 2.99700900  | 0.52349700  |
| O  | -0.86876300 | 1.78890900  | -0.88307400 |
| C  | -0.89946000 | 3.14897400  | -1.29518500 |
| C  | -0.32791400 | 3.91228200  | -0.09329900 |

|    |             |             |             |
|----|-------------|-------------|-------------|
| H  | -0.27400200 | 3.30047300  | -2.18696400 |
| H  | -1.92556000 | 3.44190200  | -1.53988900 |
| H  | 0.19856500  | 4.82687000  | -0.38985200 |
| H  | -1.12873200 | 4.19255200  | 0.60817000  |
| C  | 5.04156300  | -0.40976400 | -0.20318100 |
| C  | 5.64768300  | -1.64742400 | -0.39371900 |
| C  | 4.94413900  | -2.69935700 | -0.98827700 |
| C  | 3.62495900  | -2.49296800 | -1.39113300 |
| C  | 3.00678100  | -1.25540600 | -1.20851100 |
| C  | 3.71186800  | -0.20638700 | -0.60885000 |
| H  | 5.59834600  | 0.39758300  | 0.26242700  |
| H  | 6.67387500  | -1.79221700 | -0.07307100 |
| H  | 3.06749000  | -3.30049600 | -1.85439000 |
| H  | 1.98434400  | -1.09076300 | -1.52021200 |
| S  | 3.01193900  | 1.40951300  | -0.37255300 |
| O  | 1.46598600  | 1.23275500  | -0.94689300 |
| H  | 5.41896100  | -3.66292300 | -1.13332200 |
| C  | -2.25946200 | -1.65115200 | -0.56273400 |
| H  | -2.42415300 | -2.04827200 | -1.56890100 |
| H  | -2.53161000 | -2.44162900 | 0.14287100  |
| C  | -3.14875800 | -0.44302900 | -0.34237000 |
| H  | -3.11422600 | -0.07183500 | 0.67788000  |
| H  | -2.93967700 | 0.36731700  | -1.03306300 |
| Br | -5.08248200 | -0.89764200 | -0.63215300 |

Zero-point correction= 0.328871  
(Hartree/Particle)  
Thermal correction to Energy= 0.351314  
Thermal correction to Enthalpy= 0.352258  
Thermal correction to Gibbs Free Energy= 0.271993  
Sum of electronic and zero-point Energies= -3882.281756  
Sum of electronic and thermal Energies= -3882.259313  
Sum of electronic and thermal Enthalpies= -3882.258369  
Sum of electronic and thermal Free Energies= -3882.338634

Transition state for internal alkylation of **1.4a.C** – **1.4a.C.TS**

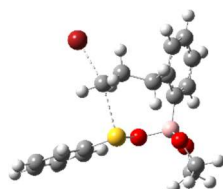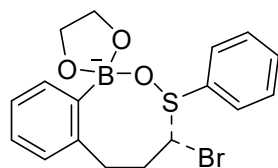

|      |            |            |             |
|------|------------|------------|-------------|
| -1 1 |            |            |             |
| C    | 0.80346500 | 1.34457600 | -0.74887300 |
| H    | 1.85237800 | 1.21394000 | -0.94367300 |

|    |             |             |             |
|----|-------------|-------------|-------------|
| H  | 0.44097000  | 1.09319600  | 0.23433000  |
| Br | 1.47612700  | 3.58338400  | 0.18019600  |
| S  | 0.76488500  | -1.27145200 | -0.91347200 |
| C  | 2.33408400  | -1.50929500 | -0.11106200 |
| C  | 3.48849100  | -1.41727400 | -0.90135000 |
| C  | 2.43525900  | -1.77094700 | 1.25758800  |
| C  | 4.73965600  | -1.58063500 | -0.31443900 |
| H  | 3.41089200  | -1.22404500 | -1.96635700 |
| C  | 3.69616800  | -1.93986000 | 1.83065200  |
| H  | 1.53464500  | -1.84200900 | 1.85246500  |
| C  | 4.84967800  | -1.84371400 | 1.05338200  |
| H  | 5.63023100  | -1.50763400 | -0.92853400 |
| H  | 3.77308000  | -2.14485600 | 2.89281900  |
| H  | 5.82585500  | -1.97390500 | 1.50596800  |
| O  | -0.26259300 | -1.59439800 | 0.31722400  |
| C  | -0.15446600 | 1.67360300  | -1.86060000 |
| H  | -0.34835200 | 2.74791200  | -1.82306300 |
| H  | 0.33556800  | 1.48981400  | -2.82136700 |
| C  | -1.51475000 | 0.93232400  | -1.82587400 |
| H  | -2.12897300 | 1.37663000  | -2.61728500 |
| H  | -1.37802600 | -0.11208300 | -2.09920700 |
| C  | -2.25897100 | 1.02940100  | -0.50430000 |
| C  | -2.39997100 | -0.07801200 | 0.36423300  |
| C  | -2.81718900 | 2.26946900  | -0.15869600 |
| C  | -3.10008600 | 0.13710500  | 1.56647700  |
| C  | -3.50321300 | 2.45245200  | 1.03895400  |
| H  | -2.71440100 | 3.10680100  | -0.84373100 |
| C  | -3.64129500 | 1.37443000  | 1.91233500  |
| H  | -3.22794300 | -0.70143800 | 2.24229900  |
| H  | -3.92646700 | 3.42115400  | 1.28363400  |
| H  | -4.17319500 | 1.49492300  | 2.85101200  |
| B  | -1.83799700 | -1.57548600 | 0.07023800  |
| O  | -2.35265700 | -2.56355000 | 1.00755800  |
| O  | -2.10719600 | -2.11101500 | -1.27188100 |
| C  | -2.58545500 | -3.44722500 | -1.13922300 |
| H  | -3.65962900 | -3.48001400 | -1.36850600 |
| H  | -2.06561100 | -4.11322600 | -1.83668500 |
| C  | -2.32098100 | -3.81313200 | 0.32940500  |
| H  | -3.07973000 | -4.48174300 | 0.74639600  |
| H  | -1.33690600 | -4.28907300 | 0.44212200  |

Zero-point correction= 0.328070  
(Hartree/Particle)  
Thermal correction to Energy= 0.349888  
Thermal correction to Enthalpy= 0.350833  
Thermal correction to Gibbs Free Energy= 0.273432  
Sum of electronic and zero-point Energies= -3882.252700  
Sum of electronic and thermal Energies= -3882.230882  
Sum of electronic and thermal Enthalpies= -3882.229938  
Sum of electronic and thermal Free Energies= -3882.307339

Transition state for reaction of **1** and **4a** w/o precomplexation – **1.4a.TS**



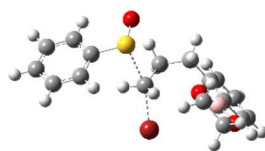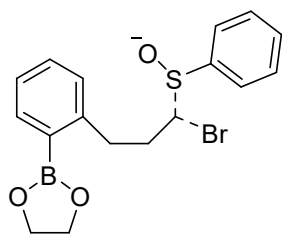

|    |             |             |             |  |
|----|-------------|-------------|-------------|--|
| -1 | 1           |             |             |  |
| C  | 0.60887600  | -0.51260300 | -0.02735300 |  |
| H  | 1.53794100  | -0.89075300 | -0.41774900 |  |
| H  | 0.26406100  | 0.43674300  | -0.40205100 |  |
| Br | -0.52538900 | -1.71263100 | -1.87336800 |  |
| S  | 2.45267800  | 1.11057800  | 1.32760300  |  |
| O  | 2.43483400  | 0.32924200  | 2.70403500  |  |
| C  | 3.85355700  | 0.48619100  | 0.40990100  |  |
| C  | 4.13132400  | 1.00462500  | -0.86511000 |  |
| C  | 4.68191000  | -0.50351400 | 0.95037600  |  |
| C  | 5.22418700  | 0.53259600  | -1.58520800 |  |
| H  | 3.49422200  | 1.77438500  | -1.29004000 |  |
| C  | 5.77552300  | -0.96957800 | 0.21976400  |  |
| H  | 4.45616600  | -0.89092100 | 1.93690000  |  |
| C  | 6.05413200  | -0.45746200 | -1.04788400 |  |
| H  | 5.43062600  | 0.93791300  | -2.57015700 |  |
| H  | 6.41376200  | -1.73707200 | 0.64554000  |  |
| H  | 6.90499000  | -0.82218000 | -1.61194900 |  |
| C  | 0.10076100  | -1.05001100 | 1.26125200  |  |
| H  | -0.04162000 | -2.13256800 | 1.18993800  |  |
| H  | 0.92705200  | -0.90575700 | 1.98797200  |  |
| C  | -1.14152500 | -0.35559700 | 1.86149600  |  |
| H  | -1.17984600 | -0.64126100 | 2.91799900  |  |
| H  | -0.98374600 | 0.72151400  | 1.83488800  |  |
| C  | -2.48179900 | -0.71371600 | 1.24553700  |  |
| C  | -3.22212900 | 0.15226300  | 0.40676900  |  |
| C  | -3.02213800 | -1.96748800 | 1.56674400  |  |
| C  | -4.47129000 | -0.28943900 | -0.07709300 |  |
| C  | -4.25223800 | -2.38636500 | 1.07107100  |  |
| H  | -2.46323200 | -2.62697500 | 2.22377200  |  |
| C  | -4.98651500 | -1.54073200 | 0.23927600  |  |
| H  | -5.04244800 | 0.37112200  | -0.71968900 |  |
| H  | -4.63883900 | -3.36438700 | 1.33754100  |  |
| H  | -5.94866200 | -1.85252900 | -0.15187300 |  |
| B  | -2.77391400 | 1.57216400  | -0.05497100 |  |
| O  | -3.63233400 | 2.40364000  | -0.74541800 |  |
| O  | -1.53782300 | 2.14668500  | 0.13458100  |  |
| C  | -1.57706500 | 3.50020000  | -0.37067500 |  |
| H  | -1.55404100 | 4.18659300  | 0.47874800  |  |
| H  | -0.69969000 | 3.67240400  | -0.99421000 |  |

|                                              |             |            |              |
|----------------------------------------------|-------------|------------|--------------|
| C                                            | -2.90023400 | 3.57772500 | -1.15653800  |
| H                                            | -2.74574500 | 3.53034400 | -2.23705400  |
| H                                            | -3.48507000 | 4.46630200 | -0.91696200  |
| Zero-point correction=                       |             |            | 0.327819     |
| (Hartree/Particle)                           |             |            |              |
| Thermal correction to Energy=                |             |            | 0.350731     |
| Thermal correction to Enthalpy=              |             |            | 0.351676     |
| Thermal correction to Gibbs Free Energy=     |             |            | 0.268968     |
| Sum of electronic and zero-point Energies=   |             |            | -3882.253203 |
| Sum of electronic and thermal Energies=      |             |            | -3882.230291 |
| Sum of electronic and thermal Enthalpies=    |             |            | -3882.229346 |
| Sum of electronic and thermal Free Energies= |             |            | -3882.312054 |

Transition state for reaction of **1** and **4a** w/o precomplexation – **1.4a.TS** with Li counterion

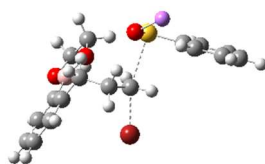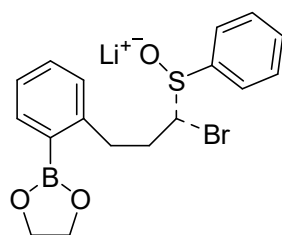

|     |             |             |             |
|-----|-------------|-------------|-------------|
| 0 1 |             |             |             |
| C   | 0.60887600  | -0.51260300 | -0.02735300 |
| H   | 1.53794100  | -0.89075300 | -0.41774900 |
| H   | 0.26406100  | 0.43674300  | -0.40205100 |
| Br  | -0.52538900 | -1.71263100 | -1.87336800 |
| S   | 2.45267800  | 1.11057800  | 1.32760300  |
| O   | 2.43483400  | 0.32924200  | 2.70403500  |
| C   | 3.85355700  | 0.48619100  | 0.40990100  |
| C   | 4.13132400  | 1.00462500  | -0.86511000 |
| C   | 4.68191000  | -0.50351400 | 0.95037600  |
| C   | 5.22418700  | 0.53259600  | -1.58520800 |
| H   | 3.49422200  | 1.77438500  | -1.29004000 |
| C   | 5.77552300  | -0.96957800 | 0.21976400  |
| H   | 4.45616600  | -0.89092100 | 1.93690000  |
| C   | 6.05413200  | -0.45746200 | -1.04788400 |
| H   | 5.43062600  | 0.93791300  | -2.57015700 |
| H   | 6.41376200  | -1.73707200 | 0.64554000  |
| H   | 6.90499000  | -0.82218000 | -1.61194900 |
| C   | 0.10076100  | -1.05001100 | 1.26125200  |
| H   | -0.04162000 | -2.13256800 | 1.18993800  |
| H   | 0.92705200  | -0.90575700 | 1.98797200  |

|    |             |             |             |
|----|-------------|-------------|-------------|
| C  | -1.14152500 | -0.35559700 | 1.86149600  |
| H  | -1.17984600 | -0.64126100 | 2.91799900  |
| H  | -0.98374600 | 0.72151400  | 1.83488800  |
| C  | -2.48179900 | -0.71371600 | 1.24553700  |
| C  | -3.22212900 | 0.15226300  | 0.40676900  |
| C  | -3.02213800 | -1.96748800 | 1.56674400  |
| C  | -4.47129000 | -0.28943900 | -0.07709300 |
| C  | -4.25223800 | -2.38636500 | 1.07107100  |
| H  | -2.46323200 | -2.62697500 | 2.22377200  |
| C  | -4.98651500 | -1.54073200 | 0.23927600  |
| H  | -5.04244800 | 0.37112200  | -0.71968900 |
| H  | -4.63883900 | -3.36438700 | 1.33754100  |
| H  | -5.94866200 | -1.85252900 | -0.15187300 |
| B  | -2.77391400 | 1.57216400  | -0.05497100 |
| O  | -3.63233400 | 2.40364000  | -0.74541800 |
| O  | -1.53782300 | 2.14668500  | 0.13458100  |
| C  | -1.57706500 | 3.50020000  | -0.37067500 |
| H  | -1.55404100 | 4.18659300  | 0.47874800  |
| H  | -0.69969000 | 3.67240400  | -0.99421000 |
| C  | -2.90023400 | 3.57772500  | -1.15653800 |
| H  | -2.74574500 | 3.53034400  | -2.23705400 |
| H  | -3.48507000 | 4.46630200  | -0.91696200 |
| Li | 4.20952759  | 0.00833801  | 3.26935199  |

Zero-point correction= 0.330215  
(Hartree/Particle)  
Thermal correction to Energy= 0.354678  
Thermal correction to Enthalpy= 0.355623  
Thermal correction to Gibbs Free Energy= 0.269902  
Sum of electronic and zero-point Energies= -3889.746665  
Sum of electronic and thermal Energies= -3889.722202  
Sum of electronic and thermal Enthalpies= -3889.721258  
Sum of electronic and thermal Free Energies= -3889.806978

Sulfoxide product formed from **1** and **4a**.

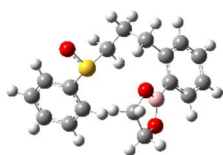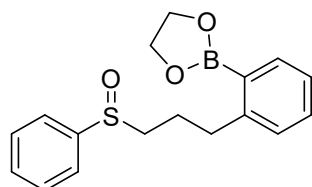

|     |            |             |             |
|-----|------------|-------------|-------------|
| 0 1 |            |             |             |
| C   | 0.69915500 | -1.75180800 | 0.61666200  |
| H   | 1.50367500 | -2.48718300 | 0.54803300  |
| H   | 0.33154600 | -1.52752400 | -0.38735800 |

|   |             |             |             |
|---|-------------|-------------|-------------|
| S | 1.50536400  | -0.19786000 | 1.22652300  |
| O | 2.24441400  | -0.58219300 | 2.51071800  |
| C | 2.75860000  | -0.07056700 | -0.09203200 |
| C | 2.39867200  | 0.45551300  | -1.33259800 |
| C | 4.06743600  | -0.45177700 | 0.18318300  |
| C | 3.37086800  | 0.57441000  | -2.32439200 |
| H | 1.37994700  | 0.77297800  | -1.52739600 |
| C | 5.03366900  | -0.32485600 | -0.81553400 |
| H | 4.31618300  | -0.83355900 | 1.16640100  |
| C | 4.68642900  | 0.18400500  | -2.06687500 |
| H | 3.10233200  | 0.97871300  | -3.29352100 |
| H | 6.05690300  | -0.62010200 | -0.61319500 |
| H | 5.44041000  | 0.28389700  | -2.83912700 |
| C | -0.41189400 | -2.22659300 | 1.55128700  |
| H | -0.68629800 | -3.23579100 | 1.22837500  |
| H | -0.00878600 | -2.33298500 | 2.56291200  |
| C | -1.67102900 | -1.33363400 | 1.60199400  |
| H | -2.35917600 | -1.78295400 | 2.32623500  |
| H | -1.41382600 | -0.35108400 | 1.99388200  |
| C | -2.38737200 | -1.19719200 | 0.26866800  |
| C | -2.50887600 | 0.02966200  | -0.42566400 |
| C | -2.93573700 | -2.35482700 | -0.30253400 |
| C | -3.15415100 | 0.02980400  | -1.68020300 |
| C | -3.58197700 | -2.32857000 | -1.53438700 |
| H | -2.85870100 | -3.29636000 | 0.23204100  |
| C | -3.68779400 | -1.12731000 | -2.23522100 |
| H | -3.24212700 | 0.96605600  | -2.21997300 |
| H | -4.00139900 | -3.24088600 | -1.94457100 |
| H | -4.18515600 | -1.09416500 | -3.19806800 |
| B | -2.02564800 | 1.42053500  | 0.09354600  |
| O | -1.79647500 | 2.46837000  | -0.77072300 |
| O | -1.83224600 | 1.77409200  | 1.40805500  |
| C | -1.31890900 | 3.12640700  | 1.44430900  |
| H | -1.86604400 | 3.69420500  | 2.19664000  |
| H | -0.26284500 | 3.08596100  | 1.72008200  |
| C | -1.53522100 | 3.65440600  | 0.01354600  |
| H | -0.65955700 | 4.16331100  | -0.38933400 |
| H | -2.40143500 | 4.31598200  | -0.05980400 |

Zero-point correction= 0.330758  
 (Hartree/Particle)  
 Thermal correction to Energy= 0.351181  
 Thermal correction to Enthalpy= 0.352125  
 Thermal correction to Gibbs Free Energy= 0.277190  
 Sum of electronic and zero-point Energies= -1307.975738  
 Sum of electronic and thermal Energies= -1307.955314  
 Sum of electronic and thermal Enthalpies= -1307.954370  
 Sum of electronic and thermal Free Energies= -1308.029306

Ethylene glycol ester of 3-bromopropyl boronic acid (reactant – 5a)

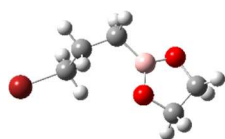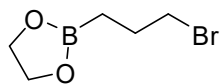

|    |   |             |             |             |
|----|---|-------------|-------------|-------------|
| 0  | 1 |             |             |             |
| B  |   | 2.00749500  | 0.53117300  | 0.08352600  |
| O  |   | 1.91739000  | -0.73395000 | 0.61065300  |
| O  |   | 3.20393600  | 0.75807700  | -0.55394800 |
| C  |   | 4.04745700  | -0.40230600 | -0.36409100 |
| C  |   | 3.11074700  | -1.46694900 | 0.24494400  |
| H  |   | 4.46140600  | -0.70219100 | -1.32690600 |
| H  |   | 4.86364500  | -0.13083000 | 0.30859600  |
| H  |   | 2.83354500  | -2.24080400 | -0.47369300 |
| H  |   | 3.52556300  | -1.93760200 | 1.13633400  |
| C  |   | 0.88865000  | 1.62244600  | 0.21896300  |
| H  |   | 0.84693000  | 2.22011100  | -0.69925400 |
| H  |   | 1.22279700  | 2.32485500  | 0.99472200  |
| C  |   | -0.52059200 | 1.12031300  | 0.59901700  |
| H  |   | -1.17060200 | 1.97182800  | 0.81711200  |
| H  |   | -0.46736000 | 0.51380200  | 1.50673400  |
| C  |   | -1.13068100 | 0.30012900  | -0.52373700 |
| H  |   | -0.56905600 | -0.60585500 | -0.73727400 |
| H  |   | -1.27113100 | 0.87675500  | -1.43538100 |
| Br |   | -2.96163700 | -0.34802100 | -0.05751000 |

|                                              |              |
|----------------------------------------------|--------------|
| Zero-point correction=                       | 0.154596     |
| (Hartree/Particle)                           |              |
| Thermal correction to Energy=                | 0.164617     |
| Thermal correction to Enthalpy=              | 0.165561     |
| Thermal correction to Gibbs Free Energy=     | 0.115611     |
| Sum of electronic and zero-point Energies=   | -2946.063827 |
| Sum of electronic and thermal Energies=      | -2946.053806 |
| Sum of electronic and thermal Enthalpies=    | -2946.052862 |
| Sum of electronic and thermal Free Energies= | -2946.102813 |

Complex of **1** with **5a** – **1.5a.C**

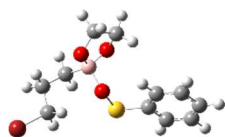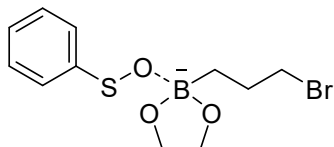

|    |   |             |            |             |
|----|---|-------------|------------|-------------|
| -1 | 1 |             |            |             |
| C  |   | -1.34737900 | 1.18347800 | -1.46269800 |

|    |             |             |             |
|----|-------------|-------------|-------------|
| H  | -1.04301800 | 0.45626700  | -2.22985500 |
| H  | -1.53091300 | 2.11915100  | -2.00815000 |
| C  | -2.70388100 | 0.74662000  | -0.85985900 |
| H  | -3.48383200 | 0.75261800  | -1.62958400 |
| H  | -3.00488200 | 1.46456300  | -0.09106900 |
| C  | -2.63495800 | -0.63861200 | -0.24838600 |
| H  | -1.95904300 | -0.70011200 | 0.59774700  |
| H  | -2.39597400 | -1.41199300 | -0.97523000 |
| Br | -4.41801600 | -1.21881800 | 0.49198300  |
| B  | -0.13839900 | 1.46327200  | -0.41214200 |
| O  | -0.53034800 | 2.27788500  | 0.75556600  |
| O  | 0.97729500  | 2.19238900  | -1.04143100 |
| O  | 0.36544700  | 0.12648300  | 0.23613000  |
| S  | 1.06004900  | -1.01946100 | -0.73406400 |
| C  | 2.74445700  | -1.07103300 | -0.16716500 |
| C  | 3.18279900  | -0.34538100 | 0.94560700  |
| C  | 3.64461200  | -1.90900800 | -0.84535400 |
| C  | 4.50824100  | -0.45331500 | 1.36726300  |
| H  | 2.48099800  | 0.29341900  | 1.46555900  |
| C  | 4.96306900  | -2.01196900 | -0.41217300 |
| H  | 3.31539800  | -2.47474500 | -1.71142800 |
| C  | 5.40577000  | -1.28390100 | 0.69612700  |
| H  | 4.83836900  | 0.11633900  | 2.22976400  |
| H  | 5.64973600  | -2.65982600 | -0.94659800 |
| H  | 6.43440600  | -1.36379100 | 1.02849900  |
| C  | 1.53107900  | 3.04647200  | -0.05165200 |
| H  | 1.98004000  | 3.92729200  | -0.52282300 |
| H  | 2.31402600  | 2.52853500  | 0.52107100  |
| C  | 0.33939200  | 3.39676200  | 0.85054600  |
| H  | -0.17039400 | 4.30402100  | 0.49121400  |
| H  | 0.63852300  | 3.56718500  | 1.89156500  |

Zero-point correction= 0.247825  
(Hartree/Particle)  
Thermal correction to Energy= 0.265511  
Thermal correction to Enthalpy= 0.266455  
Thermal correction to Gibbs Free Energy= 0.198039  
Sum of electronic and zero-point Energies= -3651.252899  
Sum of electronic and thermal Energies= -3651.235213  
Sum of electronic and thermal Enthalpies= -3651.234269  
Sum of electronic and thermal Free Energies= -3651.302686

Transition state for internal alkylation of **1.5a.C** – **1.5a.C.TS**

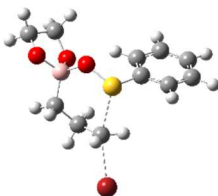

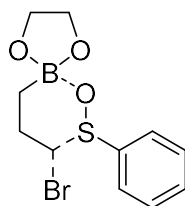

| -1 | 1 |             |             |             |
|----|---|-------------|-------------|-------------|
| C  |   | -1.61354800 | -0.55689800 | -0.31979400 |
| H  |   | -1.88050500 | -0.93831400 | -1.29181400 |
| H  |   | -1.80800900 | 0.48337700  | -0.12711900 |
| S  |   | 0.43667100  | 0.47851000  | -1.56148600 |
| O  |   | 1.74826200  | -0.42387100 | -1.22696100 |
| Br |   | -4.04431400 | -0.88860100 | 0.31371300  |
| C  |   | -0.84663500 | -1.41987000 | 0.63794300  |
| H  |   | -1.57345100 | -2.08122200 | 1.11656200  |
| H  |   | -0.43229700 | -0.79679300 | 1.43605100  |
| C  |   | 0.26310900  | -2.27535600 | -0.02700400 |
| H  |   | 0.40760100  | -3.16322900 | 0.60061400  |
| H  |   | -0.10413300 | -2.65557000 | -0.99022100 |
| C  |   | 3.67705100  | -1.34206000 | 1.06630400  |
| C  |   | 3.83813800  | -2.59111900 | 0.19243800  |
| H  |   | 4.19205900  | -0.48134900 | 0.61309000  |
| H  |   | 4.06175400  | -1.47697400 | 2.08202300  |
| H  |   | 4.78927700  | -2.60687300 | -0.35118100 |
| H  |   | 3.77748500  | -3.50447100 | 0.80351100  |
| B  |   | 1.72909200  | -1.61300400 | -0.18287600 |
| C  |   | 0.60883400  | 1.95744900  | -0.56797100 |
| C  |   | -0.15157100 | 3.07380000  | -0.94001900 |
| C  |   | 1.45357100  | 2.01459500  | 0.54367900  |
| C  |   | -0.07355200 | 4.24324200  | -0.18702600 |
| H  |   | -0.79292700 | 3.03380300  | -1.81441000 |
| C  |   | 1.53354700  | 3.19764100  | 1.27827700  |
| H  |   | 2.01885300  | 1.13483100  | 0.82776000  |
| C  |   | 0.77241400  | 4.31152300  | 0.92153200  |
| H  |   | -0.66442400 | 5.10522500  | -0.47615200 |
| H  |   | 2.19010000  | 3.24418800  | 2.14044900  |
| H  |   | 0.83812600  | 5.22570100  | 1.50030100  |
| O  |   | 2.27183100  | -1.12949300 | 1.09928000  |
| O  |   | 2.74630100  | -2.53289900 | -0.71499700 |

|                                              |              |
|----------------------------------------------|--------------|
| Zero-point correction=                       | 0.246739     |
| (Hartree/Particle)                           |              |
| Thermal correction to Energy=                | 0.264006     |
| Thermal correction to Enthalpy=              | 0.264950     |
| Thermal correction to Gibbs Free Energy=     | 0.197723     |
| Sum of electronic and zero-point Energies=   | -3651.229083 |
| Sum of electronic and thermal Energies=      | -3651.211815 |
| Sum of electronic and thermal Enthalpies=    | -3651.210871 |
| Sum of electronic and thermal Free Energies= | -3651.278099 |

Transition state for reaction of **1** and **5a** w/o precomplexation – **1.5a.TS**

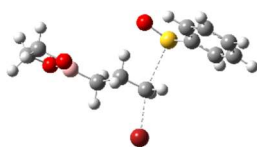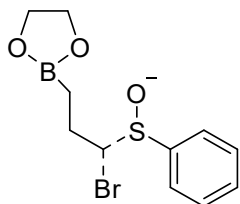

|    |   |             |             |             |
|----|---|-------------|-------------|-------------|
| -1 | 1 |             |             |             |
| C  |   | 0.18159500  | -1.01075400 | -0.45707000 |
| H  |   | 0.18652500  | -1.30970700 | -1.49282100 |
| H  |   | 1.11201500  | -1.10686700 | 0.07773400  |
| Br |   | -0.45066700 | -3.30716900 | 0.22298200  |
| S  |   | 1.57797700  | 1.18215300  | -1.53708700 |
| O  |   | 0.64000100  | 2.30814300  | -0.93842000 |
| C  |   | 2.97099100  | 1.04193500  | -0.42531900 |
| C  |   | 3.06529100  | 1.84927300  | 0.71358600  |
| C  |   | 3.98755800  | 0.11494700  | -0.70610500 |
| C  |   | 4.16545600  | 1.72662200  | 1.56292300  |
| H  |   | 2.27443400  | 2.56215500  | 0.91517600  |
| C  |   | 5.07987600  | 0.00028100  | 0.14808500  |
| H  |   | 3.92280700  | -0.51268400 | -1.58981000 |
| C  |   | 5.17662300  | 0.80516900  | 1.28837500  |
| H  |   | 4.23179700  | 2.35623400  | 2.44431600  |
| H  |   | 5.86010900  | -0.71951300 | -0.07585000 |
| H  |   | 6.02956700  | 0.71318500  | 1.95108000  |
| C  |   | -0.88854300 | -0.13285900 | 0.06977300  |
| H  |   | -0.99203500 | -0.28405600 | 1.14763900  |
| H  |   | -0.51658100 | 0.90943700  | -0.05202900 |
| C  |   | -2.24282300 | -0.25988700 | -0.64268000 |
| H  |   | -2.12209500 | -0.06823200 | -1.71589600 |
| H  |   | -2.59288800 | -1.29895100 | -0.57202000 |
| C  |   | -4.54990800 | 2.05805000  | 1.29835200  |
| C  |   | -5.39918500 | 1.72883000  | 0.05341100  |
| H  |   | -5.05839800 | 1.82183400  | 2.23352300  |
| H  |   | -4.22698000 | 3.10122000  | 1.31932100  |
| H  |   | -6.25870500 | 1.09778700  | 0.29100900  |
| H  |   | -5.74401800 | 2.61955400  | -0.47257000 |
| B  |   | -3.37706600 | 0.66351200  | -0.08765900 |
| O  |   | -3.38002300 | 1.21908900  | 1.17064600  |
| O  |   | -4.50699000 | 0.98625400  | -0.80741200 |

Zero-point correction= 0.246288  
 (Hartree/Particle)  
 Thermal correction to Energy= 0.264675  
 Thermal correction to Enthalpy= 0.265619  
 Thermal correction to Gibbs Free Energy= 0.193201  
 Sum of electronic and zero-point Energies= -3651.230231  
 Sum of electronic and thermal Energies= -3651.211843



Sum of electronic and thermal Enthalpies= -3651.210899  
 Sum of electronic and thermal Free Energies= -3651.283318

Sulfoxide product formed from **1** and **5a**.

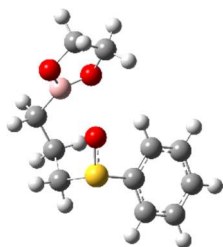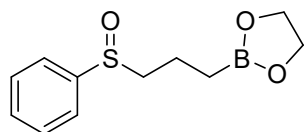

|   |   |             |             |             |
|---|---|-------------|-------------|-------------|
| 0 | 1 |             |             |             |
| C |   | -0.31785600 | -2.29504100 | 0.35282000  |
| H |   | 0.25634900  | -3.14044800 | -0.03506100 |
| H |   | -1.30244800 | -2.66474200 | 0.65024100  |
| S |   | -0.65751000 | -1.26307300 | -1.14615400 |
| O |   | 0.60484900  | -0.44001400 | -1.42035000 |
| C |   | 0.40985100  | -1.61098100 | 1.51238800  |
| H |   | 0.25540000  | -2.26504300 | 2.37726100  |
| H |   | -0.08218200 | -0.66648400 | 1.76178500  |
| C |   | 1.92731700  | -1.40580700 | 1.30906900  |
| H |   | 2.39010700  | -1.33670900 | 2.30401700  |
| H |   | 2.36273200  | -2.30089200 | 0.85194400  |
| C |   | 2.63574600  | 2.05950300  | -0.07731600 |
| C |   | 3.79494800  | 1.23288900  | -0.67128000 |
| H |   | 1.93077800  | 2.38891200  | -0.84430100 |
| H |   | 2.97847300  | 2.92578900  | 0.49001600  |
| H |   | 3.86598400  | 1.32581300  | -1.75572800 |
| H |   | 4.76000500  | 1.48934800  | -0.22701200 |
| B |   | 2.40622200  | -0.12764400 | 0.53381800  |
| C |   | -1.88747400 | -0.12129700 | -0.43069300 |
| C |   | -3.21696200 | -0.53323000 | -0.33650400 |
| C |   | -1.49736800 | 1.16161600  | -0.06056400 |
| C |   | -4.16761500 | 0.35378200  | 0.16569800  |
| H |   | -3.51357400 | -1.52704800 | -0.65473600 |
| C |   | -2.45817700 | 2.04355700  | 0.43595300  |
| H |   | -0.45795500 | 1.45051100  | -0.15604000 |
| C |   | -3.78863300 | 1.64112700  | 0.55113900  |
| H |   | -5.20314700 | 0.04358300  | 0.24466100  |
| H |   | -2.16569400 | 3.04450900  | 0.73223000  |
| H |   | -4.53192600 | 2.33093100  | 0.93406400  |
| O |   | 1.95876500  | 1.14740400  | 0.81202200  |
| O |   | 3.47932100  | -0.13330800 | -0.33020100 |

Zero-point correction= 0.249620  
 (Hartree/Particle)

|                                              |              |
|----------------------------------------------|--------------|
| Thermal correction to Energy=                | 0.265250     |
| Thermal correction to Enthalpy=              | 0.266194     |
| Thermal correction to Gibbs Free Energy=     | 0.204535     |
| Sum of electronic and zero-point Energies=   | -1076.944312 |
| Sum of electronic and thermal Energies=      | -1076.928682 |
| Sum of electronic and thermal Enthalpies=    | -1076.927737 |
| Sum of electronic and thermal Free Energies= | -1076.989397 |

Transition state for reaction of **1** and **3a** w/o precomplexation – **1.3a.TS2**

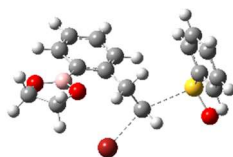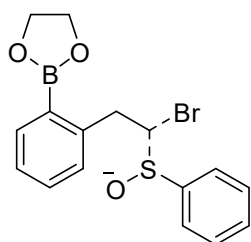

|    |   |             |             |             |
|----|---|-------------|-------------|-------------|
| -1 | 1 |             |             |             |
| C  |   | -0.96188800 | 0.21836700  | -1.20988200 |
| C  |   | -2.26293500 | 0.74244400  | -1.03203900 |
| C  |   | -0.52536400 | -0.09653100 | -2.50373100 |
| C  |   | -3.07791600 | 0.90883200  | -2.17032800 |
| C  |   | -1.34430700 | 0.08633800  | -3.61411600 |
| H  |   | 0.47556600  | -0.49042900 | -2.64455100 |
| C  |   | -2.63366000 | 0.59059700  | -3.44863800 |
| H  |   | -4.08063400 | 1.29989400  | -2.03933000 |
| H  |   | -0.97635500 | -0.16388800 | -4.60331900 |
| H  |   | -3.28259600 | 0.73375000  | -4.30546400 |
| B  |   | -2.88939500 | 1.16610600  | 0.33248300  |
| O  |   | -4.25087400 | 1.32424100  | 0.47740700  |
| O  |   | -2.20391700 | 1.46528400  | 1.48718300  |
| C  |   | -3.16734600 | 1.71854300  | 2.53550400  |
| H  |   | -2.87767400 | 2.62065700  | 3.07435300  |
| H  |   | -3.15979500 | 0.86961300  | 3.22260200  |
| C  |   | -4.50893200 | 1.86313700  | 1.79254600  |
| H  |   | -5.31583300 | 1.29730600  | 2.25847400  |
| H  |   | -4.81583900 | 2.90640600  | 1.68622000  |
| C  |   | -0.00336100 | -0.00921300 | -0.05539200 |
| H  |   | 0.83539600  | 0.69567900  | -0.15289700 |
| H  |   | -0.46780400 | 0.24373100  | 0.89471800  |
| C  |   | 0.57682200  | -1.38874700 | 0.03489500  |
| H  |   | 0.54652200  | -2.06732800 | -0.79893200 |
| H  |   | 1.23940500  | -1.63378100 | 0.84775500  |
| Br |   | -1.24732900 | -2.67504400 | 1.09484800  |
| S  |   | 3.11046300  | -1.15846300 | -0.91163800 |
| C  |   | 3.54520000  | 0.38872200  | -0.14308800 |

|   |            |             |             |
|---|------------|-------------|-------------|
| C | 3.20215200 | 1.59823300  | -0.77119500 |
| C | 4.22210800 | 0.41348900  | 1.08322000  |
| C | 3.53154200 | 2.81162000  | -0.17234600 |
| H | 2.69483000 | 1.58898400  | -1.73091400 |
| C | 4.54852700 | 1.63400400  | 1.67167800  |
| H | 4.48396900 | -0.52793000 | 1.55173200  |
| C | 4.20613600 | 2.83785600  | 1.05167500  |
| H | 3.26473100 | 3.74035200  | -0.66550600 |
| H | 5.07484000 | 1.64535800  | 2.62062800  |
| H | 4.46369200 | 3.78433000  | 1.51316400  |
| O | 3.72391500 | -2.30420600 | -0.01674100 |

|                                              |              |
|----------------------------------------------|--------------|
| Zero-point correction=                       | 0.299573     |
| (Hartree/Particle)                           |              |
| Thermal correction to Energy=                | 0.321257     |
| Thermal correction to Enthalpy=              | 0.322201     |
| Thermal correction to Gibbs Free Energy=     | 0.241964     |
| Sum of electronic and zero-point Energies=   | -3842.956054 |
| Sum of electronic and thermal Energies=      | -3842.934370 |
| Sum of electronic and thermal Enthalpies=    | -3842.933426 |
| Sum of electronic and thermal Free Energies= | -3843.013663 |

Second transition state for reaction of **1** and **4a** w/o precomplexation – **1.4a.TS2**

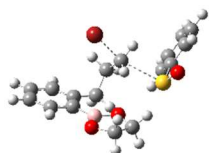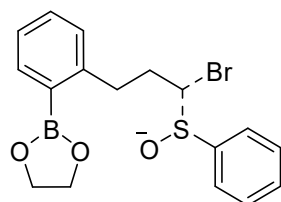

|      |             |             |             |
|------|-------------|-------------|-------------|
| -1 1 |             |             |             |
| C    | -0.57725200 | -0.44372500 | 0.60866300  |
| H    | -1.46594400 | -0.62360300 | 1.18889200  |
| H    | -0.02160500 | 0.45276500  | 0.82118200  |
| Br   | 0.72085300  | -1.69955200 | 2.24695400  |
| S    | -2.24155700 | 1.55356700  | -0.19609100 |
| O    | -2.39842200 | 2.27623700  | 1.20055200  |
| C    | -3.69270900 | 0.54115500  | -0.41588200 |
| C    | -4.63474800 | 0.40628500  | 0.61261000  |
| C    | -3.89563100 | -0.13271300 | -1.63281800 |
| C    | -5.75747800 | -0.39907600 | 0.42696000  |
| H    | -4.47105200 | 0.94138300  | 1.54067900  |
| C    | -5.01780700 | -0.93834100 | -1.80502600 |
| H    | -3.18770500 | -0.01205500 | -2.44689500 |
| C    | -5.95568200 | -1.07802900 | -0.77703300 |
| H    | -6.48269400 | -0.49685500 | 1.22839000  |
| H    | -5.16595400 | -1.45333100 | -2.74843600 |

|   |             |             |             |
|---|-------------|-------------|-------------|
| H | -6.83078000 | -1.70241000 | -0.91683600 |
| C | -0.39533000 | -1.16825500 | -0.69537300 |
| H | -0.16465800 | -2.21981600 | -0.50325700 |
| H | -1.36880200 | -1.18117600 | -1.19882900 |
| C | 0.64743500  | -0.55894400 | -1.66036300 |
| H | 0.42469800  | -0.95004500 | -2.65862700 |
| H | 0.50258200  | 0.51901500  | -1.70232900 |
| C | 2.09612600  | -0.89856500 | -1.35264800 |
| C | 3.02698900  | 0.01411400  | -0.80270600 |
| C | 2.52762000  | -2.19614500 | -1.66565800 |
| C | 4.34968700  | -0.42678900 | -0.58673400 |
| C | 3.83531300  | -2.61115300 | -1.43865700 |
| H | 1.81924800  | -2.89429100 | -2.10133500 |
| C | 4.75819400  | -1.71923300 | -0.89214800 |
| H | 5.06622500  | 0.26913800  | -0.16534300 |
| H | 4.13384500  | -3.62295500 | -1.69155700 |
| H | 5.78192000  | -2.02781300 | -0.71163400 |
| B | 2.72349400  | 1.48787600  | -0.39276000 |
| O | 3.72978800  | 2.34222600  | 0.00795300  |
| O | 1.48779600  | 2.08802600  | -0.35986400 |
| C | 1.65921000  | 3.47768600  | 0.00034900  |
| H | 1.45224100  | 4.08987000  | -0.88016400 |
| H | 0.94843300  | 3.72957000  | 0.78717900  |
| C | 3.12822500  | 3.57647300  | 0.45635300  |
| H | 3.22371700  | 3.63388300  | 1.54302500  |
| H | 3.65760900  | 4.41622300  | 0.00529800  |

|                                              |              |
|----------------------------------------------|--------------|
| Zero-point correction=                       | 0.328066     |
| (Hartree/Particle)                           |              |
| Thermal correction to Energy=                | 0.351072     |
| Thermal correction to Enthalpy=              | 0.352016     |
| Thermal correction to Gibbs Free Energy=     | 0.268506     |
| Sum of electronic and zero-point Energies=   | -3882.249537 |
| Sum of electronic and thermal Energies=      | -3882.226531 |
| Sum of electronic and thermal Enthalpies=    | -3882.225587 |
| Sum of electronic and thermal Free Energies= | -3882.309098 |

Second transition state for reaction of **1** and **5a** w/o precomplexation – **1.5a.TS2**

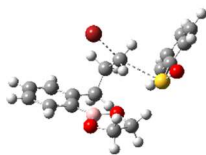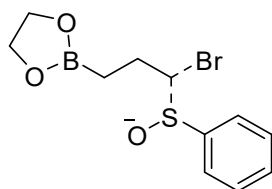

|      |            |            |            |
|------|------------|------------|------------|
| -1 1 |            |            |            |
| C    | 0.18315300 | 1.27697300 | 0.24287300 |

|    |             |             |             |
|----|-------------|-------------|-------------|
| H  | 0.12657000  | 1.73586400  | 1.21459000  |
| H  | 1.10748800  | 1.39462000  | -0.29847200 |
| Br | -0.74847500 | 3.28817300  | -0.76807200 |
| S  | 1.88076800  | -0.16074900 | 1.79461000  |
| O  | 2.79519900  | 1.02519700  | 2.29657300  |
| C  | 2.75472900  | -0.95431000 | 0.45668700  |
| C  | 3.94750600  | -0.41076200 | -0.03761100 |
| C  | 2.24511000  | -2.13581800 | -0.10817500 |
| C  | 4.61262400  | -1.03618900 | -1.09134300 |
| H  | 4.33452900  | 0.49357800  | 0.41749200  |
| C  | 2.91435800  | -2.74806800 | -1.16410700 |
| H  | 1.33821700  | -2.58245400 | 0.28720800  |
| C  | 4.10155200  | -2.20291000 | -1.66334200 |
| H  | 5.53642800  | -0.60908400 | -1.46805100 |
| H  | 2.51298000  | -3.65983100 | -1.59388100 |
| H  | 4.62264100  | -2.68592700 | -2.48208300 |
| C  | -0.79570100 | 0.21553200  | -0.16882400 |
| H  | -1.07896700 | 0.37885900  | -1.21171500 |
| H  | -0.27084000 | -0.74674800 | -0.16873200 |
| C  | -2.04131700 | 0.13581300  | 0.72254200  |
| H  | -1.74471600 | -0.03254300 | 1.76540800  |
| H  | -2.54696300 | 1.11069100  | 0.72258600  |
| C  | -4.15391500 | -2.60837700 | -0.85023800 |
| C  | -4.98775500 | -2.23329700 | 0.39262200  |
| H  | -4.71815400 | -2.52854200 | -1.77971100 |
| H  | -3.72235900 | -3.60899100 | -0.77751600 |
| H  | -5.92184800 | -1.73117800 | 0.13110000  |
| H  | -5.20855600 | -3.09021000 | 1.02967000  |
| B  | -3.09295300 | -0.95046900 | 0.31845700  |
| O  | -3.07563600 | -1.64518700 | -0.86776000 |
| O  | -4.15449200 | -1.30393000 | 1.12144400  |

Zero-point correction= 0.246442  
(Hartree/Particle)  
Thermal correction to Energy= 0.265011  
Thermal correction to Enthalpy= 0.265955  
Thermal correction to Gibbs Free Energy= 0.192280  
Sum of electronic and zero-point Energies= -3651.225521  
Sum of electronic and thermal Energies= -3651.206952  
Sum of electronic and thermal Enthalpies= -3651.206008  
Sum of electronic and thermal Free Energies= -3651.279683

#### Transition state for direct S-methylation of phenyl sulfenate (1)

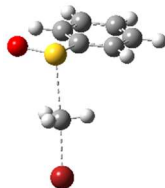

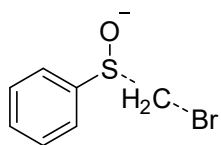

|    |             |             |             |  |
|----|-------------|-------------|-------------|--|
| -1 | 1           |             |             |  |
| C  | 1.43303400  | 0.48330100  | -0.27048100 |  |
| H  | 1.86532900  | 1.39786200  | -0.63541800 |  |
| H  | 1.08312100  | -0.24659800 | -0.97899500 |  |
| H  | 1.05893900  | 0.45432100  | 0.73762500  |  |
| Br | 3.46388700  | -0.58524000 | 0.17594500  |  |
| C  | -2.57596500 | 0.26624700  | 0.96257200  |  |
| C  | -3.38505500 | -0.83388400 | 1.24895500  |  |
| C  | -3.52000200 | -1.87536400 | 0.33029700  |  |
| C  | -2.83588700 | -1.80772400 | -0.88865000 |  |
| C  | -2.02811300 | -0.71449600 | -1.18516100 |  |
| C  | -1.89169600 | 0.33025500  | -0.25643600 |  |
| H  | -2.46354500 | 1.08394100  | 1.66492100  |  |
| H  | -3.91285500 | -0.87615300 | 2.19625700  |  |
| H  | -2.93514500 | -2.61051600 | -1.61168200 |  |
| H  | -1.50855700 | -0.66908000 | -2.13764200 |  |
| S  | -0.85678800 | 1.73579600  | -0.64181500 |  |
| O  | -0.96788400 | 2.72690900  | 0.58409100  |  |
| H  | -4.14954900 | -2.72837900 | 0.55659900  |  |

|                                              |              |
|----------------------------------------------|--------------|
| Zero-point correction=                       | 0.129526     |
| (Hartree/Particle)                           |              |
| Thermal correction to Energy=                | 0.140834     |
| Thermal correction to Enthalpy=              | 0.141778     |
| Thermal correction to Gibbs Free Energy=     | 0.088401     |
| Sum of electronic and zero-point Energies=   | -3319.204966 |
| Sum of electronic and thermal Energies=      | -3319.193658 |
| Sum of electronic and thermal Enthalpies=    | -3319.192714 |
| Sum of electronic and thermal Free Energies= | -3319.246091 |

Methyl phenyl sulfoxide, S-methylation of phenyl sulfenate (1)

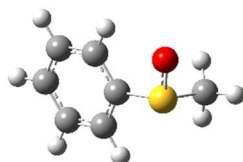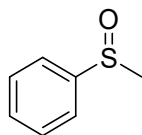

|   |             |             |             |  |
|---|-------------|-------------|-------------|--|
| 0 | 1           |             |             |  |
| C | -2.19771900 | -0.80653400 | -0.61548500 |  |
| C | -0.81587000 | -0.94519800 | -0.49691100 |  |
| C | -0.10002200 | 0.00929400  | 0.22506200  |  |
| C | -0.73614100 | 1.07689000  | 0.84846700  |  |

|   |             |             |             |
|---|-------------|-------------|-------------|
| C | -2.12033800 | 1.20467700  | 0.72609700  |
| C | -2.84899700 | 0.26779300  | -0.00626600 |
| H | -2.76470000 | -1.54051400 | -1.17626200 |
| H | -0.31210300 | -1.78901200 | -0.95617600 |
| H | -0.15040600 | 1.78525500  | 1.42242300  |
| H | -2.62747500 | 2.03362700  | 1.20635700  |
| H | -3.92443000 | 0.36843300  | -0.09614600 |
| S | 1.70500600  | -0.18084300 | 0.42700000  |
| O | 2.15093300  | 0.88019900  | 1.43270400  |
| C | 2.20269200  | 0.44031000  | -1.22237800 |
| H | 3.29197300  | 0.41623100  | -1.24657100 |
| H | 1.79460400  | -0.22086800 | -1.98711000 |
| H | 1.83256700  | 1.45858800  | -1.34039700 |

|                                              |             |
|----------------------------------------------|-------------|
| Zero-point correction=                       | 0.131943    |
| (Hartree/Particle)                           |             |
| Thermal correction to Energy=                | 0.140651    |
| Thermal correction to Enthalpy=              | 0.141595    |
| Thermal correction to Gibbs Free Energy=     | 0.097538    |
| Sum of electronic and zero-point Energies=   | -744.926577 |
| Sum of electronic and thermal Energies=      | -744.917870 |
| Sum of electronic and thermal Enthalpies=    | -744.916925 |
| Sum of electronic and thermal Free Energies= | -744.960983 |

#### Ethylene glycol ester of phenyl boronic acid (6a)

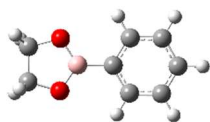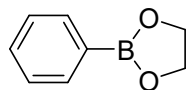

|     |             |             |             |
|-----|-------------|-------------|-------------|
| 0 1 |             |             |             |
| C   | 1.30367800  | 1.20555900  | 0.00547100  |
| C   | 0.58117300  | 0.00001200  | -0.00005200 |
| C   | 1.30366200  | -1.20554500 | -0.00553600 |
| C   | 2.69718400  | -1.20834600 | -0.00560700 |
| C   | 3.39585700  | -0.00000900 | 0.00004000  |
| C   | 2.69720000  | 1.20833800  | 0.00563600  |
| H   | 0.76706400  | 2.14815100  | 0.00913400  |
| H   | 3.23860100  | -2.14793100 | -0.00965700 |
| H   | 4.48037100  | -0.00001600 | 0.00007800  |
| H   | 3.23863000  | 2.14791500  | 0.00972300  |
| B   | -0.97161000 | 0.00002500  | -0.00002300 |
| O   | -1.73074500 | 1.14469900  | 0.05183900  |
| O   | -1.73068300 | -1.14466700 | -0.05184400 |
| C   | -3.12149200 | -0.76806400 | 0.07361400  |
| C   | -3.12153700 | 0.76801700  | -0.07356800 |
| H   | -3.69776700 | -1.26915300 | -0.70428800 |
| H   | -3.48045500 | -1.09334400 | 1.05241600  |
| H   | -3.48055200 | 1.09327400  | -1.05235900 |

|                                              |             |             |             |
|----------------------------------------------|-------------|-------------|-------------|
| H                                            | -3.69781100 | 1.26907700  | 0.70435300  |
| H                                            | 0.76703600  | -2.14813100 | -0.00923400 |
| Zero-point correction=                       |             |             | 0.160516    |
| (Hartree/Particle)                           |             |             |             |
| Thermal correction to Energy=                |             |             | 0.169671    |
| Thermal correction to Enthalpy=              |             |             | 0.170615    |
| Thermal correction to Gibbs Free Energy=     |             |             | 0.124905    |
| Sum of electronic and zero-point Energies=   |             |             | -485.648614 |
| Sum of electronic and thermal Energies=      |             |             | -485.639458 |
| Sum of electronic and thermal Enthalpies=    |             |             | -485.638514 |
| Sum of electronic and thermal Free Energies= |             |             | -485.684224 |

### Complex of phenyl sulfenate (1) and 6a

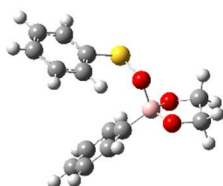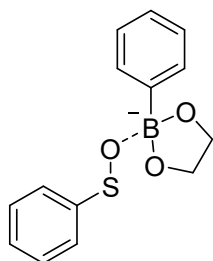

```

-1 1
C -2.20989400 -0.47749500 -1.04890300
C -3.43787400 -0.01990900 -1.52772700
C -4.56861800 -0.02069100 -0.71103200
C -4.46069700 -0.48691000 0.60255900
C -3.24142900 -0.94488600 1.09220800
C -2.10490100 -0.94047700 0.26692400
H -1.32961600 -0.47667400 -1.67788600
H -3.50774100 0.33957400 -2.54914900
H -5.33061300 -0.49297400 1.25067700
H -3.17105900 -1.30449400 2.11412200
S -0.58316000 -1.56758300 0.93978200
O 0.47293100 -1.43281400 -0.32949900
H -5.51987100 0.33591500 -1.08912200
C 0.90185000 1.82481800 -1.06394800
C 1.29103500 1.03664400 0.03332300
C 1.31086300 1.67044700 1.28672400
C 0.95357000 3.01243300 1.44441600
C 0.56835300 3.76865600 0.33688400
C 0.54639400 3.16745900 -0.92344900
H 0.88394200 1.37848800 -2.05392400
H 0.97871700 3.46889400 2.42950600

```



```

H 0.29250900 4.81183900 0.45259100
H 0.25431600 3.74657500 -1.79445400
B 1.72083200 -0.51188200 -0.16529300
O 2.48486400 -0.76548400 -1.40022000
O 2.56832300 -1.00717400 0.93253900
C 3.41647600 -1.99484300 0.36472600
C 3.65730300 -1.49688400 -1.06789800
H 4.33868400 -2.07950600 0.94847300
H 2.92186100 -2.97752100 0.35555200
H 4.53772600 -0.83779400 -1.10988000
H 3.81440400 -2.31912400 -1.77563900
H 1.61961400 1.10113200 2.15766900

```

```

Zero-point correction= 0.253353
(Hartree/Particle)
Thermal correction to Energy= 0.270380
Thermal correction to Enthalpy= 0.271324
Thermal correction to Gibbs Free Energy= 0.204934
Sum of electronic and zero-point Energies= -1190.837248
Sum of electronic and thermal Energies= -1190.820220
Sum of electronic and thermal Enthalpies= -1190.819276
Sum of electronic and thermal Free Energies= -1190.885667

```

Transition state for S- methylation of phenyl sulfenate (**1**) complexed to **6a**.

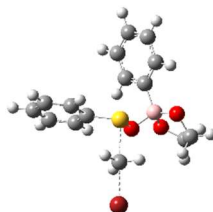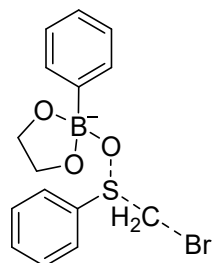

```

-1 1
C -2.64340800 -0.20006700 0.49718300
H -2.46311300 -0.14270300 -0.56154700
H -2.49721300 -1.13172400 1.01352100
H -2.87824600 0.68875100 1.05504100
Br -5.01402700 -0.68052800 0.15148300
C 0.09713900 2.18185300 -1.23056500
C 0.09607200 3.50354600 -1.67621700
C -0.18784000 4.54857800 -0.79716200
C -0.46855100 4.26852200 0.54200200
C -0.46462800 2.95397500 1.00130900
C -0.18146900 1.91165700 0.11016400

```

|   |             |             |             |
|---|-------------|-------------|-------------|
| H | 0.31756300  | 1.36294200  | -1.90268000 |
| H | 0.31683900  | 3.71439300  | -2.71681200 |
| H | -0.68531700 | 5.07493900  | 1.23354200  |
| H | -0.67290500 | 2.74327900  | 2.04516800  |
| S | -0.23318400 | 0.23988700  | 0.73860800  |
| O | 0.26720500  | -0.65311400 | -0.52673700 |
| H | -0.18773500 | 5.57339100  | -1.15005500 |
| C | 3.40363600  | 0.13162400  | -0.82671100 |
| C | 2.82056800  | -0.76047000 | 0.09030400  |
| C | 3.45035300  | -0.88512500 | 1.33890300  |
| C | 4.59833800  | -0.15702600 | 1.66344300  |
| C | 5.15568600  | 0.72043700  | 0.73330000  |
| C | 4.55232700  | 0.86150100  | -0.51842700 |
| H | 2.95092100  | 0.25660900  | -1.80596100 |
| H | 5.05894700  | -0.27616300 | 2.63946200  |
| H | 6.04829900  | 1.28658800  | 0.97857100  |
| H | 4.97891600  | 1.53901100  | -1.25178900 |
| B | 1.51661300  | -1.62698900 | -0.30286000 |
| O | 1.60354400  | -2.33027300 | -1.58127600 |
| O | 1.15708200  | -2.62847100 | 0.69676800  |
| C | 0.50642900  | -3.68122200 | -0.00672400 |
| C | 1.17911300  | -3.67636900 | -1.38784100 |
| H | 0.63811300  | -4.62558200 | 0.52957800  |
| H | -0.57042200 | -3.48050300 | -0.09639300 |
| H | 2.04992700  | -4.34715100 | -1.40489800 |
| H | 0.49530300  | -3.98285300 | -2.18674100 |
| H | 3.03368900  | -1.57160900 | 2.06882700  |

|                                              |              |
|----------------------------------------------|--------------|
| Zero-point correction=                       | 0.290773     |
| (Hartree/Particle)                           |              |
| Thermal correction to Energy=                | 0.312277     |
| Thermal correction to Enthalpy=              | 0.313221     |
| Thermal correction to Gibbs Free Energy=     | 0.233450     |
| Sum of electronic and zero-point Energies=   | -3804.859015 |
| Sum of electronic and thermal Energies=      | -3804.837511 |
| Sum of electronic and thermal Enthalpies=    | -3804.836567 |
| Sum of electronic and thermal Free Energies= | -3804.916338 |

### Dimethylphenylborane (6b)

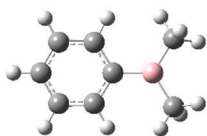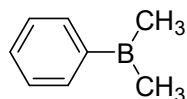

|     |             |             |             |
|-----|-------------|-------------|-------------|
| 0 1 |             |             |             |
| C   | -0.60174900 | -1.20047300 | -0.03450400 |
| C   | 0.13789500  | 0.00000000  | 0.00000000  |
| C   | -0.60174900 | 1.20047300  | 0.03450400  |

|   |             |             |             |
|---|-------------|-------------|-------------|
| C | -1.99484700 | 1.20620200  | 0.04194500  |
| C | -2.69537400 | 0.00000000  | 0.00000000  |
| C | -1.99484700 | -1.20620200 | -0.04194500 |
| H | -0.07896600 | -2.14983500 | -0.06035100 |
| H | -2.53475100 | 2.14623000  | 0.07596000  |
| H | -3.77998600 | 0.00000000  | 0.00000000  |
| H | -2.53475100 | -2.14623000 | -0.07596000 |
| B | 1.70993900  | 0.00000000  | 0.00000000  |
| H | -0.07896600 | 2.14983500  | 0.06035200  |
| C | 2.53150800  | -1.34482800 | 0.07135100  |
| H | 2.01634800  | -2.20037700 | 0.51450900  |
| H | 2.78367300  | -1.62845400 | -0.96268400 |
| H | 3.49180700  | -1.21291600 | 0.58100600  |
| C | 2.53150800  | 1.34482700  | -0.07135100 |
| H | 2.01634600  | 2.20038000  | -0.51450000 |
| H | 2.78368400  | 1.62844700  | 0.96268400  |
| H | 3.49180300  | 1.21291700  | -0.58101500 |

|                                              |             |
|----------------------------------------------|-------------|
| Zero-point correction=                       | 0.167037    |
| (Hartree/Particle)                           |             |
| Thermal correction to Energy=                | 0.176563    |
| Thermal correction to Enthalpy=              | 0.177507    |
| Thermal correction to Gibbs Free Energy=     | 0.131597    |
| Sum of electronic and zero-point Energies=   | -336.275335 |
| Sum of electronic and thermal Energies=      | -336.265809 |
| Sum of electronic and thermal Enthalpies=    | -336.264865 |
| Sum of electronic and thermal Free Energies= | -336.310776 |

### Complex of phenyl sulfenate (1) and 6b

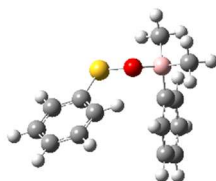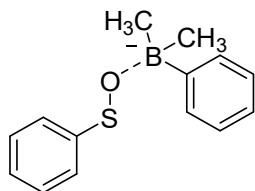

|      |            |             |             |
|------|------------|-------------|-------------|
| -1 1 |            |             |             |
| C    | 2.31163000 | -0.11791200 | 0.98180400  |
| C    | 3.43091500 | 0.60593400  | 1.39459900  |
| C    | 4.37221700 | 1.05656500  | 0.46927000  |
| C    | 4.18328700 | 0.77417800  | -0.88734500 |
| C    | 3.07084500 | 0.05510800  | -1.31197400 |
| C    | 2.12214500 | -0.39400200 | -0.37739000 |
| H    | 1.58057400 | -0.47362600 | 1.69583200  |
| H    | 3.56599400 | 0.81624800  | 2.45058400  |
| H    | 4.90537500 | 1.11875100  | -1.62001900 |

|   |             |             |             |
|---|-------------|-------------|-------------|
| H | 2.93506200  | -0.15477500 | -2.36845700 |
| S | 0.74408200  | -1.33805200 | -0.97482200 |
| O | -0.11830200 | -1.63042400 | 0.41095300  |
| H | 5.23961600  | 1.61842900  | 0.79624900  |
| C | -1.32744100 | 1.18401800  | 0.78689200  |
| C | -2.02334600 | 0.16237700  | 0.11027000  |
| C | -3.05441700 | 0.59240300  | -0.74544500 |
| C | -3.37709800 | 1.94267100  | -0.91677700 |
| C | -2.66390900 | 2.92596800  | -0.23158900 |
| C | -1.63040400 | 2.53654000  | 0.62413600  |
| H | -0.51798600 | 0.90961600  | 1.45659300  |
| H | -4.18260600 | 2.22658400  | -1.58819100 |
| H | -2.90643000 | 3.97576400  | -0.36173200 |
| H | -1.06307600 | 3.28934800  | 1.16426900  |
| B | -1.68071400 | -1.41980400 | 0.37894000  |
| H | -3.62636800 | -0.14652200 | -1.29891400 |
| C | -2.12663100 | -1.84856800 | 1.89440700  |
| H | -3.21325900 | -1.75796900 | 2.02918600  |
| H | -1.86123600 | -2.89220200 | 2.11525300  |
| H | -1.65680300 | -1.22198400 | 2.66466700  |
| C | -2.33121600 | -2.42426800 | -0.73791900 |
| H | -2.02704600 | -3.46324100 | -0.54960300 |
| H | -3.42963200 | -2.41266700 | -0.71808300 |
| H | -2.03697100 | -2.18658600 | -1.77045100 |

Zero-point correction= 0.261392  
(Hartree/Particle)  
Thermal correction to Energy= 0.278380  
Thermal correction to Enthalpy= 0.279324  
Thermal correction to Gibbs Free Energy= 0.214387  
Sum of electronic and zero-point Energies= -1041.476847  
Sum of electronic and thermal Energies= -1041.459859  
Sum of electronic and thermal Enthalpies= -1041.458915  
Sum of electronic and thermal Free Energies= -1041.523852

Transition state for S- methylation of phenyl sulfenate (**1**) complexed to **6b**.

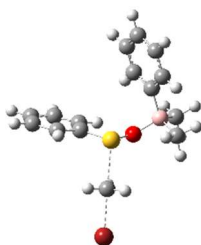

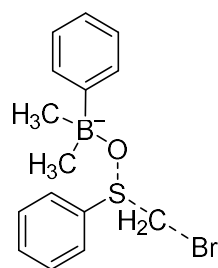

|    |             |             |             |  |
|----|-------------|-------------|-------------|--|
| -1 | 1           |             |             |  |
| C  | 2.55300000  | -0.51709200 | -0.42198300 |  |
| H  | 2.41697700  | -0.30524600 | 0.62358000  |  |
| H  | 2.36221900  | -1.50766300 | -0.79384300 |  |
| H  | 2.76786200  | 0.27998000  | -1.11108600 |  |
| Br | 4.92131400  | -0.99082900 | -0.11829600 |  |
| C  | -0.08079200 | 2.09039500  | 1.13663900  |  |
| C  | -0.02870900 | 3.45169000  | 1.43626700  |  |
| C  | 0.25077100  | 4.38741600  | 0.44042300  |  |
| C  | 0.47633200  | 3.95613300  | -0.86883200 |  |
| C  | 0.42096100  | 2.60068700  | -1.18252200 |  |
| C  | 0.14131100  | 1.66830800  | -0.17544900 |  |
| H  | -0.29643300 | 1.35482300  | 1.90041400  |  |
| H  | -0.20576800 | 3.77952500  | 2.45476500  |  |
| H  | 0.68962300  | 4.67654600  | -1.65056700 |  |
| H  | 0.58596300  | 2.27326200  | -2.20384300 |  |
| S  | 0.12561100  | -0.06041400 | -0.61987600 |  |
| O  | -0.36433500 | -0.79032700 | 0.74865600  |  |
| H  | 0.29040900  | 5.44378400  | 0.67980500  |  |
| C  | -3.35584400 | 0.05125600  | 0.65587100  |  |
| C  | -2.89095000 | -1.15430300 | 0.09335300  |  |
| C  | -3.68685100 | -1.69806300 | -0.93119800 |  |
| C  | -4.86737400 | -1.08892900 | -1.36859200 |  |
| C  | -5.29427700 | 0.10632100  | -0.79099800 |  |
| C  | -4.52716200 | 0.67699100  | 0.22752700  |  |
| H  | -2.78019300 | 0.51583900  | 1.45104600  |  |
| H  | -5.45111700 | -1.54586700 | -2.16244300 |  |
| H  | -6.20758500 | 0.58611700  | -1.12752300 |  |
| H  | -4.84561000 | 1.60791000  | 0.68773100  |  |
| B  | -1.54006900 | -1.88590400 | 0.65694000  |  |
| H  | -3.37994400 | -2.62526200 | -1.40559400 |  |
| C  | -1.01222000 | -3.11444700 | -0.27587900 |  |
| H  | -0.83890100 | -2.83376900 | -1.32466300 |  |
| H  | -0.06721200 | -3.52009900 | 0.10921000  |  |
| H  | -1.72579000 | -3.94917600 | -0.29356000 |  |
| C  | -1.71135000 | -2.33021800 | 2.21580700  |  |
| H  | -2.48991400 | -3.09816800 | 2.31848700  |  |
| H  | -0.78481000 | -2.75698200 | 2.62370300  |  |
| H  | -2.00160200 | -1.49465800 | 2.86619900  |  |

Zero-point correction= 0.298858  
 (Hartree/Particle)  
 Thermal correction to Energy= 0.320281  
 Thermal correction to Enthalpy= 0.321225

|                                              |              |
|----------------------------------------------|--------------|
| Thermal correction to Gibbs Free Energy=     | 0.243266     |
| Sum of electronic and zero-point Energies=   | -3655.499561 |
| Sum of electronic and thermal Energies=      | -3655.478138 |
| Sum of electronic and thermal Enthalpies=    | -3655.477193 |
| Sum of electronic and thermal Free Energies= | -3655.555153 |

### Difluorophenylborane (6c)

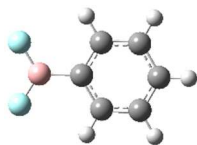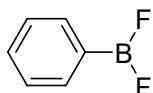

|   |             |             |             |  |
|---|-------------|-------------|-------------|--|
| 0 | 1           |             |             |  |
| C | 0.00006400  | 1.20967500  | 0.52947600  |  |
| C | 0.00000000  | 0.00000000  | -0.18853600 |  |
| C | -0.00006400 | -1.20967500 | 0.52947600  |  |
| C | 0.00000000  | -1.21057900 | 1.92122700  |  |
| C | 0.00000000  | 0.00000000  | 2.61666800  |  |
| C | 0.00000000  | 1.21057900  | 1.92122700  |  |
| H | 0.00013100  | 2.15165300  | -0.00753000 |  |
| H | 0.00001200  | -2.14854600 | 2.46440100  |  |
| H | 0.00000000  | 0.00000000  | 3.70099700  |  |
| H | -0.00001200 | 2.14854600  | 2.46440100  |  |
| B | 0.00000000  | 0.00000000  | -1.72591300 |  |
| H | -0.00013100 | -2.15165300 | -0.00753000 |  |
| F | -0.00105200 | -1.12920400 | -2.44235500 |  |
| F | 0.00105200  | 1.12920400  | -2.44235500 |  |

|                                              |             |
|----------------------------------------------|-------------|
| Zero-point correction=                       | 0.100006    |
| (Hartree/Particle)                           |             |
| Thermal correction to Energy=                | 0.107344    |
| Thermal correction to Enthalpy=              | 0.108288    |
| Thermal correction to Gibbs Free Energy=     | 0.068038    |
| Sum of electronic and zero-point Energies=   | -456.357775 |
| Sum of electronic and thermal Energies=      | -456.350437 |
| Sum of electronic and thermal Enthalpies=    | -456.349493 |
| Sum of electronic and thermal Free Energies= | -456.389743 |

### Complex of phenyl sulfenate (1) and 6c

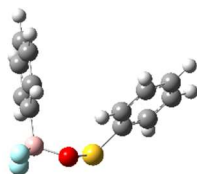

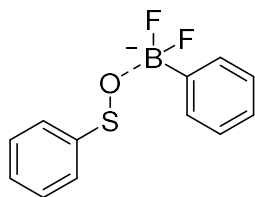

|    |             |             |             |  |
|----|-------------|-------------|-------------|--|
| -1 | 1           |             |             |  |
| C  | 1.93679100  | 0.05199400  | 1.02521000  |  |
| C  | 2.94019800  | 0.95090100  | 1.38826600  |  |
| C  | 3.97751100  | 1.25719300  | 0.50798000  |  |
| C  | 4.00538200  | 0.65208500  | -0.75154000 |  |
| C  | 3.01012800  | -0.24529200 | -1.12653300 |  |
| C  | 1.96725200  | -0.54792900 | -0.23713000 |  |
| H  | 1.13090800  | -0.18718600 | 1.70597400  |  |
| H  | 2.90706400  | 1.41357900  | 2.36901600  |  |
| H  | 4.80517100  | 0.88079900  | -1.44762900 |  |
| H  | 3.04272800  | -0.70799600 | -2.10797000 |  |
| S  | 0.74796700  | -1.73043900 | -0.76714200 |  |
| O  | -0.26492600 | -1.82025700 | 0.54614100  |  |
| H  | 4.75382600  | 1.95652200  | 0.79632100  |  |
| C  | -1.78022400 | 1.17178900  | 1.07244900  |  |
| C  | -1.87506000 | 0.20523400  | 0.05667900  |  |
| C  | -2.13778000 | 0.67301200  | -1.24075200 |  |
| C  | -2.29254400 | 2.03384600  | -1.51726200 |  |
| C  | -2.19131600 | 2.97165400  | -0.48939000 |  |
| C  | -1.93573100 | 2.53405600  | 0.81172700  |  |
| H  | -1.58705700 | 0.85089500  | 2.09185300  |  |
| H  | -2.49473600 | 2.36208000  | -2.53220800 |  |
| H  | -2.31294500 | 4.02952300  | -0.69803800 |  |
| H  | -1.86001600 | 3.25452200  | 1.62036500  |  |
| B  | -1.69129200 | -1.36738000 | 0.38706900  |  |
| H  | -2.22904500 | -0.04375900 | -2.05042500 |  |
| F  | -2.31146800 | -2.18067000 | -0.62330800 |  |
| F  | -2.27688100 | -1.70535600 | 1.64823200  |  |

|                                              |              |
|----------------------------------------------|--------------|
| Zero-point correction=                       | 0.194006     |
| (Hartree/Particle)                           |              |
| Thermal correction to Energy=                | 0.209168     |
| Thermal correction to Enthalpy=              | 0.210112     |
| Thermal correction to Gibbs Free Energy=     | 0.148693     |
| Sum of electronic and zero-point Energies=   | -1161.581783 |
| Sum of electronic and thermal Energies=      | -1161.566621 |
| Sum of electronic and thermal Enthalpies=    | -1161.565677 |
| Sum of electronic and thermal Free Energies= | -1161.627097 |

Transition state for S-methylation of phenyl sulfenate (**1**) complexed to **6c**.

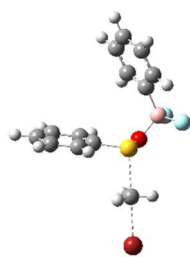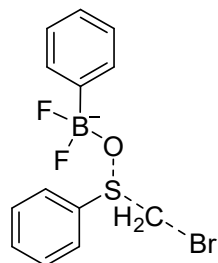

|    |   |             |             |             |
|----|---|-------------|-------------|-------------|
| -1 | 1 |             |             |             |
| C  |   | 2.62370400  | -0.41148000 | -0.40743800 |
| H  |   | 2.42788700  | -0.25707800 | 0.63898100  |
| H  |   | 2.57607100  | -1.40364900 | -0.81962200 |
| H  |   | 2.83739000  | 0.42525900  | -1.04836400 |
| Br |   | 5.03761500  | -0.68792400 | 0.05169600  |
| C  |   | -0.31255700 | 1.84885000  | 1.07583000  |
| C  |   | -0.43802100 | 3.19031900  | 1.43601800  |
| C  |   | -0.22335500 | 4.19972300  | 0.49790400  |
| C  |   | 0.11427400  | 3.86500300  | -0.81485400 |
| C  |   | 0.23591900  | 2.52962500  | -1.19068500 |
| C  |   | 0.02255400  | 1.52575900  | -0.23928600 |
| H  |   | -0.47858300 | 1.05835200  | 1.79561700  |
| H  |   | -0.70305600 | 3.44423900  | 2.45625100  |
| H  |   | 0.27714700  | 4.64338900  | -1.55155100 |
| H  |   | 0.48678800  | 2.27518000  | -2.21508800 |
| S  |   | 0.24162600  | -0.16846900 | -0.76594900 |
| O  |   | -0.22491400 | -1.02378800 | 0.54410900  |
| H  |   | -0.32160200 | 5.24011400  | 0.78519300  |
| C  |   | -3.49813800 | -0.52864500 | 1.09948000  |
| C  |   | -2.80877100 | -1.21779700 | 0.08720400  |
| C  |   | -3.38576300 | -1.21644900 | -1.19231900 |
| C  |   | -4.58881800 | -0.55643100 | -1.45562000 |
| C  |   | -5.25143000 | 0.12198900  | -0.43278500 |
| C  |   | -4.70124900 | 0.13248000  | 0.85066900  |
| H  |   | -3.08798200 | -0.51413500 | 2.10492500  |
| H  |   | -5.01019900 | -0.57431000 | -2.45582100 |
| H  |   | -6.18696200 | 0.63431200  | -0.63146000 |
| H  |   | -5.21175000 | 0.65336800  | 1.65460700  |
| B  |   | -1.41942000 | -1.97263200 | 0.40312100  |
| H  |   | -2.88737500 | -1.74803500 | -1.99658800 |
| F  |   | -1.08893100 | -2.92271300 | -0.61017800 |
| F  |   | -1.43707100 | -2.62710400 | 1.66301700  |

Zero-point correction=  
(Hartree/Particle)

0.231352



|                                              |              |
|----------------------------------------------|--------------|
| Thermal correction to Energy=                | 0.250959     |
| Thermal correction to Enthalpy=              | 0.251903     |
| Thermal correction to Gibbs Free Energy=     | 0.176792     |
| Sum of electronic and zero-point Energies=   | -3775.600892 |
| Sum of electronic and thermal Energies=      | -3775.581286 |
| Sum of electronic and thermal Enthalpies=    | -3775.580341 |
| Sum of electronic and thermal Free Energies= | -3775.655453 |

### Trimethylborane (7)

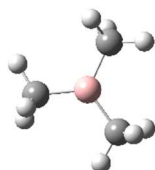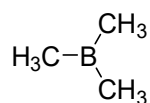

|     |             |             |             |
|-----|-------------|-------------|-------------|
| 0 1 |             |             |             |
| B   | -0.00312800 | -0.00021000 | -0.00757800 |
| C   | 0.65270800  | 1.43153000  | 0.00936600  |
| H   | 1.71244800  | 1.45174900  | 0.28016100  |
| H   | 0.57465500  | 1.83135400  | -1.01422600 |
| H   | 0.10601800  | 2.14122900  | 0.64046200  |
| C   | -1.57104100 | -0.15118000 | -0.00714300 |
| H   | -1.91444600 | -0.90304000 | -0.72720800 |
| H   | -1.86747700 | -0.53962400 | 0.97965100  |
| H   | -2.12535800 | 0.77771800  | -0.16939100 |
| C   | 0.91651000  | -1.27988600 | -0.00584500 |
| H   | 1.39323000  | -1.35563400 | 0.98302500  |
| H   | 0.40035700  | -2.22484100 | -0.19732300 |
| H   | 1.74714700  | -1.18064700 | -0.71553100 |

|                                              |             |
|----------------------------------------------|-------------|
| Zero-point correction=                       | 0.111804    |
| (Hartree/Particle)                           |             |
| Thermal correction to Energy=                | 0.118907    |
| Thermal correction to Enthalpy=              | 0.119851    |
| Thermal correction to Gibbs Free Energy=     | 0.080920    |
| Sum of electronic and zero-point Energies=   | -144.545787 |
| Sum of electronic and thermal Energies=      | -144.538685 |
| Sum of electronic and thermal Enthalpies=    | -144.537740 |
| Sum of electronic and thermal Free Energies= | -144.576671 |

### Complex of phenyl sulfenate (1) and 7

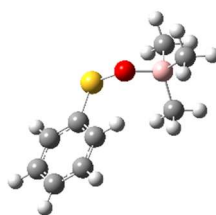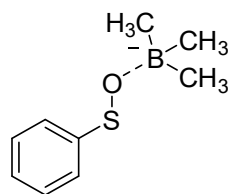

|    |   |             |             |             |
|----|---|-------------|-------------|-------------|
| -1 | 1 |             |             |             |
| C  |   | -1.38469300 | 0.93155800  | -0.35617600 |
| C  |   | -2.61731800 | 1.56497800  | -0.19606400 |
| C  |   | -3.75506500 | 0.83710700  | 0.15375400  |
| C  |   | -3.64793200 | -0.54410000 | 0.34391300  |
| C  |   | -2.42388300 | -1.18693100 | 0.18716400  |
| C  |   | -1.27918000 | -0.45034400 | -0.16179400 |
| H  |   | -0.49831800 | 1.49068300  | -0.62571600 |
| H  |   | -2.68605400 | 2.63748200  | -0.34687800 |
| H  |   | -4.52307400 | -1.12470600 | 0.61625200  |
| H  |   | -2.35529600 | -2.26018100 | 0.33680800  |
| S  |   | 0.25228100  | -1.32767700 | -0.37880400 |
| O  |   | 1.32069700  | -0.15662400 | -0.83092000 |
| H  |   | -4.71012500 | 1.33482600  | 0.27703500  |
| B  |   | 2.49722800  | 0.28272100  | 0.15268400  |
| C  |   | 3.28683100  | 1.40236700  | -0.74024900 |
| H  |   | 4.15114400  | 1.80655400  | -0.19343400 |
| H  |   | 3.67319400  | 0.98923600  | -1.68334300 |
| H  |   | 2.64868900  | 2.25906300  | -1.00113800 |
| C  |   | 3.44216800  | -1.01975200 | 0.46214600  |
| H  |   | 3.83635000  | -1.47654600 | -0.45791000 |
| H  |   | 4.31259000  | -0.74342700 | 1.07512900  |
| H  |   | 2.91409100  | -1.81186000 | 1.01284200  |
| C  |   | 1.87376100  | 0.92052600  | 1.52483300  |
| H  |   | 2.67570300  | 1.22193700  | 2.21476800  |
| H  |   | 1.26405900  | 1.81597800  | 1.33893900  |
| H  |   | 1.24069800  | 0.21072300  | 2.07627600  |

|                                              |             |
|----------------------------------------------|-------------|
| Zero-point correction=                       | 0.207102    |
| (Hartree/Particle)                           |             |
| Thermal correction to Energy=                | 0.221106    |
| Thermal correction to Enthalpy=              | 0.222050    |
| Thermal correction to Gibbs Free Energy=     | 0.166113    |
| Sum of electronic and zero-point Energies=   | -849.745116 |
| Sum of electronic and thermal Energies=      | -849.731111 |
| Sum of electronic and thermal Enthalpies=    | -849.730167 |
| Sum of electronic and thermal Free Energies= | -849.786105 |

Transition state for S-methylation of phenyl sulfenate (**1**) complexed to **7**.

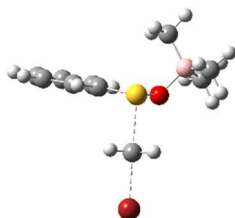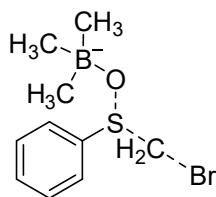

|    |             |             |             |  |
|----|-------------|-------------|-------------|--|
| -1 | 1           |             |             |  |
| C  | 1.75539000  | -0.33386700 | -0.39574900 |  |
| H  | 1.43412600  | -0.36955400 | 0.63010100  |  |
| H  | 1.82045600  | -1.24412500 | -0.96416000 |  |
| H  | 1.89515100  | 0.61260900  | -0.88659300 |  |
| Br | 4.10293600  | -0.44562000 | 0.22554100  |  |
| C  | -1.51395200 | 1.61722600  | 0.96039400  |  |
| C  | -1.75308100 | 2.92670500  | 1.37709100  |  |
| C  | -1.49963000 | 4.00047700  | 0.52348500  |  |
| C  | -1.00585200 | 3.75985900  | -0.76082400 |  |
| C  | -0.76810100 | 2.45672900  | -1.19051500 |  |
| C  | -1.02273700 | 1.38510500  | -0.32534100 |  |
| H  | -1.70794000 | 0.77512800  | 1.61193300  |  |
| H  | -2.13834400 | 3.10604500  | 2.37492900  |  |
| H  | -0.80949000 | 4.58790900  | -1.43279000 |  |
| H  | -0.39308900 | 2.27627300  | -2.19283500 |  |
| S  | -0.66786100 | -0.26921600 | -0.90575000 |  |
| O  | -1.14273000 | -1.22767800 | 0.31047800  |  |
| H  | -1.68671900 | 5.01591000  | 0.85324700  |  |
| B  | -2.41223500 | -2.22712500 | 0.11460700  |  |
| C  | -2.05375500 | -3.26289400 | -1.09522700 |  |
| H  | -1.93375800 | -2.76651100 | -2.06915300 |  |
| H  | -1.12901200 | -3.82603600 | -0.90360700 |  |
| H  | -2.85416900 | -4.00520700 | -1.22500200 |  |
| C  | -2.47240400 | -2.96082500 | 1.56736800  |  |
| H  | -3.29396200 | -3.69042100 | 1.60172000  |  |
| H  | -1.55015900 | -3.51157600 | 1.79919900  |  |
| H  | -2.64349700 | -2.25315900 | 2.39055800  |  |
| C  | -3.74241400 | -1.33558400 | -0.19666400 |  |
| H  | -4.62099000 | -1.98471600 | -0.32123000 |  |
| H  | -3.98190900 | -0.63202000 | 0.61261600  |  |
| H  | -3.66144100 | -0.74693100 | -1.12183700 |  |

Zero-point correction= 0.244612  
 (Hartree/Particle)  
 Thermal correction to Energy= 0.263060  
 Thermal correction to Enthalpy= 0.264004

Thermal correction to Gibbs Free Energy= 0.194442  
 Sum of electronic and zero-point Energies= -3463.768130  
 Sum of electronic and thermal Energies= -3463.749682  
 Sum of electronic and thermal Enthalpies= -3463.748738  
 Sum of electronic and thermal Free Energies= -3463.818300

Transition state for aryl migration from B to O.

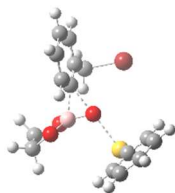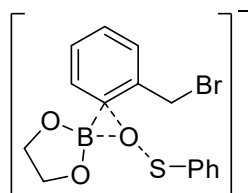

|    |             |             |             |  |
|----|-------------|-------------|-------------|--|
| -1 | 1           |             |             |  |
| C  | 0.67281900  | 1.09101200  | 2.19594000  |  |
| C  | 1.13415700  | 0.78475500  | 0.91034500  |  |
| C  | 2.40285400  | 0.19925400  | 0.74160500  |  |
| C  | 3.22026600  | 0.02907300  | 1.87044100  |  |
| C  | 2.77553600  | 0.37572800  | 3.14195800  |  |
| C  | 1.49063400  | 0.90296200  | 3.30568200  |  |
| H  | -0.32031400 | 1.50808400  | 2.31487600  |  |
| H  | 4.21240500  | -0.39372000 | 1.74413700  |  |
| H  | 3.42044300  | 0.22899800  | 4.00097200  |  |
| H  | 1.13112100  | 1.16644700  | 4.29486400  |  |
| B  | 0.15219500  | 1.52001600  | -0.46632300 |  |
| O  | -0.20749300 | 0.19301300  | -0.29741900 |  |
| S  | -1.86069000 | -0.46675900 | -1.72960700 |  |
| C  | -3.13713900 | -0.75875300 | -0.53908900 |  |
| C  | -3.22634500 | -1.98735900 | 0.14420400  |  |
| C  | -4.10300000 | 0.22453000  | -0.24832200 |  |
| C  | -4.23688000 | -2.22128100 | 1.07445100  |  |
| H  | -2.49293500 | -2.75813800 | -0.06349100 |  |
| C  | -5.11460500 | -0.01286100 | 0.67972300  |  |
| H  | -4.05100400 | 1.17905800  | -0.75940800 |  |
| C  | -5.18892200 | -1.23686500 | 1.34819100  |  |
| H  | -4.28192900 | -3.17697300 | 1.58657300  |  |
| H  | -5.84702800 | 0.76174100  | 0.88276300  |  |
| H  | -5.97566300 | -1.42028800 | 2.07143900  |  |
| O  | -0.66755000 | 2.60865200  | -0.02795100 |  |
| O  | 0.91463700  | 1.96103900  | -1.59547500 |  |
| C  | 0.84084500  | 3.38548200  | -1.64557900 |  |
| H  | 1.71355400  | 3.82224500  | -1.14285200 |  |
| H  | 0.83378700  | 3.71986300  | -2.68577400 |  |
| C  | -0.46085600 | 3.72052800  | -0.89918500 |  |

|    |             |             |             |
|----|-------------|-------------|-------------|
| H  | -1.30743300 | 3.80527900  | -1.59154200 |
| H  | -0.38880100 | 4.64612300  | -0.32134100 |
| C  | 2.91797100  | -0.20703300 | -0.59554200 |
| H  | 3.98823200  | -0.05348500 | -0.69838000 |
| H  | 2.37039200  | 0.23865400  | -1.41562900 |
| Br | 2.73612800  | -2.20692800 | -0.90725900 |

|                                              |              |
|----------------------------------------------|--------------|
| Zero-point correction=                       | 0.270019     |
| (Hartree/Particle)                           |              |
| Thermal correction to Energy=                | 0.290167     |
| Thermal correction to Enthalpy=              | 0.291111     |
| Thermal correction to Gibbs Free Energy=     | 0.215668     |
| Sum of electronic and zero-point Energies=   | -3803.644516 |
| Sum of electronic and thermal Energies=      | -3803.624368 |
| Sum of electronic and thermal Enthalpies=    | -3803.623424 |
| Sum of electronic and thermal Free Energies= | -3803.698867 |

Boronate product after aryl migration.

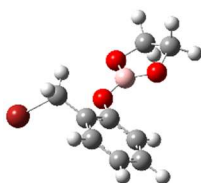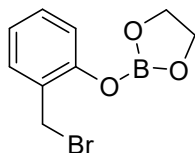

|     |             |             |             |
|-----|-------------|-------------|-------------|
| 0 1 |             |             |             |
| B   | 2.14664500  | -0.45404200 | 0.12794900  |
| O   | 2.99217200  | 0.49629400  | -0.38020800 |
| O   | 2.73903500  | -1.66338100 | 0.38059700  |
| C   | 4.15344200  | -1.50609800 | 0.12369700  |
| H   | 4.68101200  | -1.51021400 | 1.07967100  |
| H   | 4.50083700  | -2.34172700 | -0.48333900 |
| C   | 4.26971000  | -0.14800000 | -0.60464600 |
| H   | 4.41145800  | -0.26414700 | -1.68082000 |
| H   | 5.06148300  | 0.48296600  | -0.20185500 |
| O   | 0.81131800  | -0.28522300 | 0.36623600  |
| C   | 0.11122500  | 0.88902900  | 0.19794000  |
| C   | 0.55890800  | 2.08477100  | 0.75525200  |
| C   | -1.10739900 | 0.82858500  | -0.49716400 |
| C   | -0.20375800 | 3.24134700  | 0.61263700  |
| H   | 1.49713000  | 2.10463700  | 1.29504800  |
| C   | -1.85656700 | 2.00539400  | -0.62603800 |
| C   | -1.41383900 | 3.20583700  | -0.08084800 |
| H   | 0.14943400  | 4.16931100  | 1.04725800  |
| H   | -2.79792700 | 1.96948900  | -1.16379800 |
| H   | -2.00644000 | 4.10565000  | -0.19403200 |
| C   | -1.58471100 | -0.44241500 | -1.10034900 |

|                                              |             |             |              |
|----------------------------------------------|-------------|-------------|--------------|
| H                                            | -2.27802400 | -0.28040400 | -1.91892600  |
| H                                            | -0.78337400 | -1.11078700 | -1.39381100  |
| Br                                           | -2.65917400 | -1.55390800 | 0.21025600   |
| Zero-point correction=                       |             |             | 0.183567     |
| (Hartree/Particle)                           |             |             |              |
| Thermal correction to Energy=                |             |             | 0.196418     |
| Thermal correction to Enthalpy=              |             |             | 0.197362     |
| Thermal correction to Gibbs Free Energy=     |             |             | 0.140418     |
| Sum of electronic and zero-point Energies=   |             |             | -3173.777660 |
| Sum of electronic and thermal Energies=      |             |             | -3173.764810 |
| Sum of electronic and thermal Enthalpies=    |             |             | -3173.763866 |
| Sum of electronic and thermal Free Energies= |             |             | -3173.820810 |

Phenyl thiolate by-product after aryl migration.

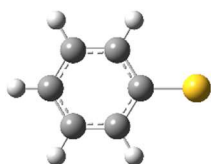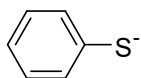

|                                              |             |             |             |
|----------------------------------------------|-------------|-------------|-------------|
| -1 1                                         |             |             |             |
| S                                            | 2.35083400  | 0.00000500  | -0.00007300 |
| C                                            | 0.58015100  | 0.00006400  | 0.00008000  |
| C                                            | -0.16428100 | -1.20172300 | 0.00012100  |
| C                                            | -0.16439300 | 1.20179200  | 0.00010600  |
| C                                            | -1.55765200 | -1.20088600 | -0.00002000 |
| H                                            | 0.37024900  | -2.14573200 | 0.00020100  |
| C                                            | -1.55776200 | 1.20082000  | -0.00000900 |
| H                                            | 0.37002600  | 2.14585800  | 0.00020800  |
| C                                            | -2.27233100 | -0.00006500 | -0.00010400 |
| H                                            | -2.08960200 | -2.14775600 | -0.00003200 |
| H                                            | -2.08979100 | 2.14764600  | -0.00002500 |
| H                                            | -3.35663000 | -0.00011000 | -0.00021900 |
| Zero-point correction=                       |             |             | 0.089620    |
| (Hartree/Particle)                           |             |             |             |
| Thermal correction to Energy=                |             |             | 0.095184    |
| Thermal correction to Enthalpy=              |             |             | 0.096128    |
| Thermal correction to Gibbs Free Energy=     |             |             | 0.059807    |
| Sum of electronic and zero-point Energies=   |             |             | -629.968246 |
| Sum of electronic and thermal Energies=      |             |             | -629.962682 |
| Sum of electronic and thermal Enthalpies=    |             |             | -629.961738 |
| Sum of electronic and thermal Free Energies= |             |             | -629.998060 |
